# Supplementary material for: Metal–organic frameworks as O2-selective adsorbents for air separations
Source: Chem Sci. 2022 Aug 11;13(35):10216–37. doi: 10.1039/d2sc03577d (PMC9473493; doi:10.1039/d2sc03577d)
Supplement: SC-013-D2SC03577D-s001 [file SC-013-D2SC03577D-s001.xlsx]

## Sheet: Qst_Mn-PCN-224
	Units = K		1/T1	1/T2	1/T3	1/T4
T1	226		0.00442478	0.003663	0.0033557								n min	0.05	mmol/g			-∆H	55.6
T2	273												Interval	0.05	mmol/g			-∆S	174.3
T3	298												Accesible sites	0.55	mmol/g			-∆S corrected	175.6
T4													Low-loading	0.3	mmol/g
n (mmol/g)	P (T1)	P (T2)	P (T3)	P (T4)	lnP (T1)	lnP (T2)	lnP (T3)	lnp (T4)	dlnP/dT	∆H	1st derivative	2nd derivative	∆H STD error	R2	Y-int	∆S	∆S STD error	1st derivative	2nd derivative	Surface coverage
0.05	4.60747e-05	0.00983005	0.0439337		-9.98525	-4.62231	-3.12507	#NUM!	-6535.62	54.3404			4.02062	0.994555	19.0192	158.135	15.4427			0.0909091
0.1	9.32176e-05	0.0228384	0.106342		-9.28057	-3.77931	-2.24109	#NUM!	-6705.98	55.7568	18.8754		4.11007	0.994596	20.4796	170.278	15.7863	181.611		0.181818
0.15	0.000148621	0.0391793	0.178352		-8.81411	-3.23961	-1.724	#NUM!	-6762.63	56.2279	4.69761	-225.566	4.42484	0.993845	21.2035	176.296	16.9953	92.49	-1359.2	0.272727
0.2	0.000217403	0.0596259	0.257452		-8.43376	-2.81967	-1.35692	#NUM!	-6762.48	56.2266	-3.68123	-158.196	4.8403	0.992644	21.592	179.527	18.591	45.6908	-828.014	0.363636
0.25	0.000307429	0.0851611	0.342329		-8.08727	-2.46321	-1.07198	#NUM!	-6718.36	55.8598	-11.1219	-161.127	5.29619	0.991091	21.753	180.865	20.342	9.68858	-728.432	0.454545
0.3	0.000433125	0.116883	0.432162		-7.74448	-2.14658	-0.838955	#NUM!	-6628.71	55.1144	-19.7939	-212.463	5.73709	0.989281	21.7085	180.495	22.0354	-27.1524	-854.679	0.545455
0.35	0.000625219	0.15587	0.526386		-7.37741	-1.85873	-0.64172	#NUM!	-6480.29	53.8804	-32.3683	-358.137	6.0911	0.987381	21.4264	178.15	23.3952	-75.7793	-1333.82	0.636364
0.4	0.000964313	0.203	0.624583		-6.94409	-1.59455	-0.470671	#NUM!	-6239.41	51.8776	-55.6076	-893.503	6.24142	0.985732	20.7971	172.918	23.9725	-160.535	-3182.29	0.727273
0.45	0.00175477	0.258791	0.726435		-6.34542	-1.35173	-0.319606	#NUM!	-5811.49	48.3196	-121.719	-1835.36	5.92876	0.985168	19.4957	162.097	22.7716	-394.008	-6452.71	0.818182
0.5	0.00574239	0.323335	0.831688		-5.15988	-1.12907	-0.184298	#NUM!	-4775.48	39.7057	-239.143	-910.523	4.11171	0.98939	16.0583	133.517	15.7926	-805.805	-3223.3	0.909091
0.55	0.0411615	0.396346	0.940135		-3.19025	-0.925468	-0.0617318	#NUM!	-2935.27	24.4053	-212.771	1496.83	0.301018	0.999848	9.80409	81.5161	1.15617	-716.338	5169.11	1
0.6	0.0957284	0.477287	1.05161		-2.34624	-0.739637	0.0503223	#NUM!	-2216.44	18.4286	-89.4607	1646.1	0.856184	0.997846	7.44276	61.8829	3.2885	-288.894	5694.57	1.09091
0.65	0.153819	0.565507	1.16596		-1.87198	-0.570033	0.153545	#NUM!	-1859.31	15.4592	-48.1606	581.979	1.19729	0.994038	6.3295	52.6267	4.59863	-146.882	1992.47	1.18182
0.7	0.214158	0.660341	1.28307		-1.54104	-0.414999	0.249256	#NUM!	-1637.21	13.6126	-31.2628	258.99	1.26752	0.991404	5.67619	47.1947	4.86838	-89.6469	871.609	1.27273
0.75	0.276406	0.761172	1.40284		-1.28588	-0.272896	0.338499	#NUM!	-1483.31	12.3329	-22.2616	144.772	1.22374	0.99025	5.2513	43.662	4.70022	-59.7207	477.473	1.36364
0.8	0.340422	0.867452	1.52516		-1.07757	-0.142195	0.422099	#NUM!	-1369.46	11.3864	-16.7855	90.8947	1.12843	0.990274	4.95792	41.2226	4.33416	-41.8996	293.036	1.45455
0.85	0.406132	0.978708	1.64997		-0.901077	-0.0215219	0.500757	#NUM!	-1281.42	10.6544	-13.1722	61.3219	1.01075	0.991081	4.74737	39.472	3.88217	-30.4171	192.808	1.54545
0.9	0.473502	1.09454	1.77718		-0.747599	0.0903342	0.575028	#NUM!	-1211.04	10.0692	-10.6533	43.4728	0.885241	0.99233	4.59209	38.1809	3.4001	-22.6189	133.015	1.63636
0.95	0.542519	1.21461	1.90674		-0.611532	0.194423	0.645395	#NUM!	-1153.29	9.58906	-8.82488	31.9737	0.759571	0.993765	4.47533	37.2101	2.91742	-17.1156	94.9939	1.72727
1	0.613182	1.33862	2.03858		-0.489093	0.291639	0.712253	#NUM!	-1104.9	9.18669	-7.45598	24.1956	0.637757	0.995204	4.38624	36.4694	2.44955	-13.1195	69.6485	1.81818
1.05	0.6855	1.46633	2.17265		-0.377607	0.382763	0.775948	#NUM!	-1063.62	8.84346	-6.40532	18.7347	0.521786	0.996531	4.31754	35.8982	2.00412	-10.1507	52.1345	1.90909
1.1	0.759491	1.59753	2.30891		-0.275107	0.468459	0.836776	#NUM!	-1027.86	8.54616	-5.58251	14.7715	0.412608	0.997674	4.26415	35.4543	1.58478	-7.90602	39.6224	2
1.15	0.835175	1.73204	2.44732		-0.180114	0.5493	0.894994	#NUM!	-996.477	8.28521	-4.92817	11.8203	0.310521	0.998597	4.22245	35.1076	1.19267	-6.18851	30.4597	2.09091
1.2	0.912581	1.8697	2.58782		-0.0914784	0.625778	0.950816	#NUM!	-968.59	8.05335	-4.40049	9.58353	0.215453	0.999285	4.18972	34.8354	0.827527	-4.86006	23.647	2.18182
1.25	0.99174	2.01037	2.7304		-0.0082943	0.698319	1.00445	#NUM!	-943.552	7.84516	-3.96982	7.85861	0.127244	0.999737	4.164	34.6216	0.488729	-3.82381	18.494	2.27273
1.3	1.07269	2.15394	2.87501		0.0701695	0.767299	1.05606	#NUM!	-920.845	7.65636	-3.61462	6.50168	0.0454866	0.999965	4.14373	34.4531	0.174708	-3.01066	14.5123	2.36364
1.35	1.15546	2.3003	3.02163		0.144499	0.83304	1.1058	#NUM!	-900.078	7.4837	-3.31965	5.41247	0.0301749	0.999984	4.12779	34.3205	0.115898	-2.37258	11.3742	2.45455
1.4	1.2401	2.44934	3.17022		0.215192	0.895819	1.1538	#NUM!	-880.919	7.3244	-3.07338	4.53855	0.100077	0.999813	4.1152	34.2158	0.384383	-1.87324	8.91684	2.54545
1.45	1.32665	2.60099	3.32076		0.282657	0.955892	1.20019	#NUM!	-863.114	7.17636	-2.8658	3.82849	0.164652	0.999474	4.10526	34.1332	0.632406	-1.4809	6.96639	2.63636
1.5	1.41516	2.75517	3.47323		0.347243	1.01348	1.24508	#NUM!	-846.451	7.03782	-2.69053	3.23429	0.224237	0.998986	4.09739	34.0677	0.861265	-1.1766	5.35845	2.72727
1.55	1.50568	2.91182	3.6276		0.409245	1.06878	1.28857	#NUM!	-830.755	6.90731	-2.54237	2.74545	0.279214	0.998369	4.09111	34.0155	1.07243	-0.945052	4.06818	2.81818
1.6	1.59827	3.07086	3.78385		0.468922	1.12196	1.33074	#NUM!	-815.874	6.78358	-2.41598	2.34371	0.329836	0.997641	4.08602	33.9732	1.26686	-0.769786	3.04235	2.90909
1.65	1.69297	3.23224	3.94196		0.526484	1.17318	1.37168	#NUM!	-801.697	6.66571	-2.308	1.997	0.376443	0.996821	4.08185	33.9385	1.44587	-0.640816	2.17345	3
1.7	1.78985	3.39591	4.10191		0.582132	1.22257	1.41145	#NUM!	-788.115	6.55278	-2.21628	1.69689	0.419295	0.995922	4.07831	33.9091	1.61046	-0.552441	1.43338	3.09091
1.75	1.88897	3.56182	4.26369		0.636032	1.27027	1.45013	#NUM!	-775.041	6.44408	-2.13831	1.44089	0.458626	0.99496	4.07521	33.8833	1.76152	-0.497478	0.818679	3.18182
1.8	1.9904	3.72993	4.42727		0.688336	1.31639	1.48778	#NUM!	-762.397	6.33895	-2.07219	1.22577	0.494683	0.993947	4.07233	33.8594	1.90002	-0.470573	0.321981	3.27273
1.85	2.09421	3.9002	4.59265		0.739176	1.36103	1.52446	#NUM!	-750.119	6.23686	-2.01573	1.03979	0.52765	0.992893	4.06955	33.8362	2.02664	-0.46528	-0.096663	3.36364
1.9	2.20046	4.07259	4.7598		0.788666	1.40428	1.56021	#NUM!	-738.153	6.13738	-1.96821	0.874255	0.557744	0.991809	4.06673	33.8129	2.14223	-0.48024	-0.463883	3.45455
1.95	2.30924	4.24706	4.92872		0.836918	1.44623	1.59508	#NUM!	-726.447	6.04004	-1.92831	0.728662	0.585091	0.990704	4.06377	33.7882	2.24726	-0.511669	-0.777373	3.54545
2	2.42061	4.42358	5.09938		0.88402	1.48695	1.62912	#NUM!	-714.961	5.94455	-1.89535	0.59863	0.609894	0.989583	4.06058	33.7617	2.34253	-0.557977	-1.0516	3.63636
2.05	2.53468	4.60212	5.27179		0.930067	1.52652	1.66237	#NUM!	-703.651	5.85051	-1.86844	0.488154	0.632242	0.988457	4.05706	33.7324	2.42836	-0.616828	-1.27187	3.72727
2.1	2.65151	4.78266	5.44591		0.975129	1.565	1.69486	#NUM!	-692.489	5.7577	-1.84653	0.38605	0.652338	0.987326	4.05316	33.7	2.50555	-0.685164	-1.47611	3.81818
2.15	2.77121	4.96517	5.62176		1.01928	1.60245	1.72664	#NUM!	-681.442	5.66585	-1.82984	0.288998	0.670241	0.986199	4.04882	33.6639	2.57432	-0.76444	-1.67552	3.90909
2.2	2.89387	5.14962	5.7993		1.06259	1.63892	1.75774	#NUM!	-670.481	5.57472	-1.81763	0.211022	0.686088	0.985079	4.04397	33.6236	2.63518	-0.852717	-1.81702	4
2.25	3.0196	5.33599	5.97854		1.10512	1.67447	1.78818	#NUM!	-659.581	5.48409	-1.80874	0.140592	0.699954	0.983971	4.03856	33.5786	2.68844	-0.946142	-1.94125	4.09091
2.3	3.14848	5.52426	6.15946		1.14692	1.70915	1.81799	#NUM!	-648.727	5.39384	-1.80357	0.067794	0.711963	0.982876	4.03259	33.5289	2.73456	-1.04684	-2.08329	4.18182
2.35	3.28065	5.71441	6.34205		1.18804	1.74299	1.8472	#NUM!	-637.89	5.30373	-1.80196	0.00513716	0.722175	0.981797	4.02597	33.4739	2.77379	-1.15447	-2.19661	4.27273
2.4	3.41621	5.90641	6.52631		1.22853	1.77604	1.87584	#NUM!	-627.055	5.21365	-1.80306	-0.0495665	0.730655	0.980738	4.0187	33.4135	2.80636	-1.2665	-2.28913	4.36364
2.45	3.55529	6.10026	6.71222		1.26844	1.80833	1.90393	#NUM!	-616.204	5.12343	-1.80691	-0.100494	0.737503	0.9797	4.01074	33.3473	2.83266	-1.38338	-2.37438	4.45455
2.5	3.69801	6.29593	6.89978		1.30779	1.8399	1.93149	#NUM!	-605.323	5.03296	-1.81311	-0.151852	0.742762	0.978685	4.00206	33.2752	2.85286	-1.50394	-2.46795	4.54545
2.55	3.84451	6.49341	7.08899		1.34665	1.87079	1.95854	#NUM!	-594.397	4.94212	-1.8221	-0.200127	0.746487	0.977694	3.99265	33.1969	2.86716	-1.63018	-2.55723	4.63636
2.6	3.99494	6.69268	7.27982		1.38503	1.90101	1.98511	#NUM!	-583.408	4.85075	-1.83312	-0.238931	0.74874	0.976729	3.98246	33.1121	2.87582	-1.75966	-2.61659	4.72727
2.65	4.14943	6.89373	7.47228		1.42297	1.93061	2.0112	#NUM!	-572.35	4.7588	-1.84599	-0.281221	0.749571	0.97579	3.97149	33.0209	2.87901	-1.89184	-2.69232	4.81818
2.7	4.30815	7.09654	7.66636		1.46051	1.95961	2.03684	#NUM!	-561.206	4.66615	-1.86124	-0.323542	0.749011	0.974881	3.9597	32.923	2.87686	-2.0289	-2.77278	4.90909
2.75	4.47127	7.30111	7.86205		1.49767	1.98803	2.06205	#NUM!	-549.964	4.57268	-1.87835	-0.358599	0.747115	0.973999	3.94709	32.818	2.86958	-2.16912	-2.83182	5
2.8	4.63896	7.50742	8.05935		1.53449	2.01589	2.08683	#NUM!	-538.615	4.47831	-1.8971	-0.393139	0.743908	0.973147	3.93362	32.706	2.85726	-2.31208	-2.89327	5.09091
2.85	4.8114	7.71546	8.25825		1.57099	2.04323	2.11121	#NUM!	-527.148	4.38297	-1.91766	-0.428911	0.739429	0.972326	3.91928	32.5868	2.84006	-2.45844	-2.96254	5.18182
2.9	4.98879	7.92521	8.45875		1.60719	2.07005	2.1352	#NUM!	-515.551	4.28655	-1.94	-0.463999	0.73369	0.971538	3.90405	32.4602	2.81801	-2.60833	-3.03132	5.27273
2.95	5.17133	8.13667	8.66083		1.64313	2.09638	2.15881	#NUM!	-503.815	4.18897	-1.96406	-0.496385	0.726741	0.970781	3.88791	32.326	2.79132	-2.76158	-3.09337	5.36364
3	5.35925	8.34984	8.8645		1.67882	2.12224	2.18205	#NUM!	-491.929	4.09014	-1.98963	-0.527918	0.718598	0.970057	3.87083	32.184	2.76005	-2.91767	-3.15663	5.45455
3.05	5.55276	8.56468	9.06975		1.7143	2.14765	2.20494	#NUM!	-479.885	3.99001	-2.01685	-0.559346	0.709264	0.969369	3.85282	32.0342	2.72419	-3.07724	-3.22047	5.54545
3.1	5.75212	8.78121	9.27657		1.74957	2.17261	2.22749	#NUM!	-467.672	3.88846	-2.04557	-0.590338	0.698779	0.968716	3.83382	31.8763	2.68393	-3.23972	-3.28466	5.63636
3.15	5.95757	8.99941	9.48497		1.78466	2.19716	2.24971	#NUM!	-455.283	3.78545	-2.07589	-0.623602	0.687147	0.9681	3.81385	31.7103	2.63925	-3.40571	-3.36037	5.72727
3.2	6.1694	9.21928	9.69493		1.8196	2.2213	2.2716	#NUM!	-442.705	3.68087	-2.10793	-0.658566	0.674389	0.967523	3.79286	31.5358	2.59024	-3.57575	-3.44596	5.81818
3.25	6.38789	9.4408	9.90646		1.8544	2.24504	2.29319	#NUM!	-429.93	3.57466	-2.14174	-0.686997	0.660499	0.966986	3.77084	31.3527	2.5369	-3.7503	-3.50557	5.90909
3.3	6.61335	9.66397	10.1195		1.88909	2.2684	2.31446	#NUM!	-416.946	3.46669	-2.17663	-0.713045	0.645526	0.966489	3.74776	31.1607	2.47939	-3.92631	-3.55747	6
3.35	6.84611	9.88878	10.3342		1.92368	2.2914	2.33546	#NUM!	-403.752	3.35699	-2.21305	-0.753519	0.629379	0.966044	3.72362	30.9601	2.41737	-4.10605	-3.67148	6.09091
3.4	7.0865	10.1152	10.5504		1.95819	2.31404	2.35616	#NUM!	-390.329	3.24539	-2.25198	-0.790952	0.612143	0.965645	3.69837	30.7501	2.35117	-4.29346	-3.77032	6.18182
3.45	7.33491	10.3433	10.7681		1.99265	2.33634	2.37659	#NUM!	-376.667	3.13179	-2.29214	-0.819738	0.593871	0.96529	3.67198	30.5307	2.28099	-4.48308	-3.83704	6.27273
3.5	7.59173	10.573	10.9874		2.02706	2.3583	2.39675	#NUM!	-362.761	3.01617	-2.33395	-0.85172	0.574445	0.964997	3.64445	30.3018	2.20637	-4.67716	-3.91762	6.36364
3.55	7.85737	10.8043	11.2082		2.06145	2.37994	2.41665	#NUM!	-348.596	2.8984	-2.37731	-0.886951	0.553924	0.964763	3.61573	30.063	2.12756	-4.87484	-4.01138	6.45455
3.6	8.13229	11.0373	11.4306		2.09584	2.40128	2.43629	#NUM!	-334.168	2.77844	-2.42265	-0.929295	0.532328	0.964592	3.58582	29.8143	2.04461	-5.0783	-4.13861	6.54545
3.65	8.41696	11.2718	11.6545		2.13025	2.4223	2.45569	#NUM!	-319.458	2.65613	-2.47024	-0.966138	0.509554	0.964504	3.55465	29.5552	1.95714	-5.2887	-4.24047	6.63636
3.7	8.71189	11.508	11.8799		2.16469	2.44304	2.47485	#NUM!	-304.458	2.53142	-2.51926	-1.00037	0.485748	0.964487	3.52221	29.2855	1.8657	-5.50235	-4.33016	6.72727
3.75	9.01764	11.7457	12.1069		2.19918	2.46349	2.49378	#NUM!	-289.158	2.40421	-2.57028	-1.04585	0.460699	0.964581	3.48848	29.0049	1.76949	-5.72172	-4.46839	6.81818
3.8	9.33479	11.9851	12.3354		2.23375	2.48366	2.51247	#NUM!	-273.545	2.27439	-2.62385	-1.0893	0.434596	0.964774	3.4534	28.7133	1.66923	-5.94919	-4.59666	6.90909
3.85	9.66398	12.226	12.5654		2.26841	2.50356	2.53095	#NUM!	-257.601	2.14182	-2.67921	-1.12373	0.407279	0.965103	3.41692	28.41	1.56431	-6.18139	-4.6905	7
3.9	10.0059	12.4686	12.797		2.30317	2.52321	2.54921	#NUM!	-241.322	2.00647	-2.73622	-1.17446	0.378823	0.965581	3.37905	28.0951	1.45501	-6.41824	-4.85246	7.09091
3.95	10.3612	12.7127	13.0301		2.33807	2.5426	2.56726	#NUM!	-224.692	1.8682	-2.79666	-1.238	0.34914	0.966252	3.33973	27.7682	1.34101	-6.66663	-5.05709	7.18182
4	10.7308	12.9584	13.2647		2.37312	2.56174	2.58511	#NUM!	-207.686	1.7268	-2.86002	-1.28877	0.318247	0.96715	3.29887	27.4285	1.22235	-6.92394	-5.21397	7.27273
4.05	11.1155	13.2057	13.5008		2.40834	2.58065	2.60275	#NUM!	-190.294	1.5822	-2.92553	-1.33023	0.286133	0.968331	3.25645	27.0758	1.099	-7.18803	-5.33596	7.36364
4.1	11.5162	13.4545	13.7384		2.44375	2.59931	2.62019	#NUM!	-172.5	1.43425	-2.99304	-1.38087	0.252712	0.969889	3.21242	26.7097	0.970636	-7.45754	-5.48815	7.45455
4.15	11.9339	13.705	13.9776		2.47938	2.61776	2.63746	#NUM!	-154.296	1.28289	-3.06362	-1.4527	0.218038	0.971925	3.16676	26.33	0.837458	-7.73684	-5.7295	7.54545
4.2	12.3697	13.957	14.2183		2.51525	2.63598	2.65453	#NUM!	-135.653	1.12789	-3.13831	-1.51974	0.181995	0.974624	3.11937	25.936	0.69902	-8.03049	-5.94978	7.63636
4.25	12.8248	14.2105	14.4605		2.55138	2.65398	2.67142	#NUM!	-116.551	0.969063	-3.21559	-1.57558	0.144545	0.978236	3.07018	25.527	0.555179	-8.33182	-6.12309	7.72727
4.3	13.3004	14.4657	14.7042		2.58779	2.67178	2.68813	#NUM!	-96.9787	0.80633	-3.29587	-1.64924	0.105785	0.98308	3.01916	25.1028	0.406305	-8.6428	-6.36652	7.81818
4.35	13.7979	14.7224	14.9494		2.62452	2.68937	2.70467	#NUM!	-76.9109	0.639476	-3.38052	-1.73438	0.0655507	0.989602	2.96623	24.6627	0.251772	-8.96847	-6.64729	7.90909
4.4	14.3189	14.9807	15.1961		2.66158	2.70676	2.72104	#NUM!	-56.3206	0.468278	-3.46931	-1.81066	0.0238425	0.997414	2.9113	24.206	0.0915762	-9.30753	-6.89851	8
4.45	14.8651	15.2405	15.4444		2.69902	2.72396	2.73725	#NUM!	-35.1849	0.292544	-3.56159	-1.89241	0.0194903	0.995581	2.85429	23.732	0.07486	-9.65832	-7.17035	8.09091
4.5	15.4381	15.5019	15.6941		2.73684	2.74096	2.75328	#NUM!	-13.4848	0.112119	-3.65855	-1.98935	0.0643298	0.75233	2.79513	23.2401	0.247083	-10.0246	-7.49154	8.18182
4.55	16.0402	15.7649	15.9454		2.7751	2.75779	2.76917	#NUM!	8.81722	-0.0733108	-3.76052	-2.0867	0.110861	0.304252	2.73372	22.7295	0.425802	-10.4075	-7.82	8.27273
4.6	16.6734	16.0294	16.1982		2.81381	2.77442	2.7849	#NUM!	31.7437	-0.263933	-3.86722	-2.19136	0.159129	0.733404	2.66996	22.1994	0.611194	-10.8066	-8.17306	8.36364
4.65	17.3402	16.2955	16.4525		2.85303	2.79089	2.80048	#NUM!	55.329	-0.460033	-3.97966	-2.30979	0.20916	0.828694	2.60375	21.6488	0.803358	-11.2248	-8.57349	8.45455
4.7	18.0433	16.5632	16.7083		2.89277	2.80718	2.81591	#NUM!	79.6077	-0.661899	-4.0982	-2.43591	0.261032	0.865406	2.53496	21.0769	1.00259	-11.6639	-9.0025	8.54545
4.75	18.7857	16.8324	16.9656		2.9331	2.82331	2.83119	#NUM!	104.619	-0.869853	-4.22325	-2.56946	0.31488	0.884143	2.46346	20.4825	1.20942	-12.125	-9.45445	8.63636
4.8	19.5708	17.1031	17.2245		2.97404	2.83926	2.84633	#NUM!	130.402	-1.08422	-4.35515	-2.71142	0.370837	0.895268	2.38913	19.8644	1.42434	-12.6094	-9.93888	8.72727
4.85	20.4022	17.3755	17.4848		3.01564	2.85506	2.86133	#NUM!	156.999	-1.30537	-4.49439	-2.86981	0.428816	0.902597	2.31181	19.2215	1.64703	-13.1189	-10.4821	8.81818
4.9	21.2841	17.6493	17.7467		3.05796	2.8707	2.8762	#NUM!	184.456	-1.53366	-4.64213	-3.04198	0.48915	0.907668	2.23134	18.5525	1.87876	-13.6576	-11.0698	8.90909
4.95	22.2212	17.9248	18.01		3.10105	2.88619	2.89093	#NUM!	212.831	-1.76958	-4.79859	42.8464	0.551745	0.911398	2.14754	17.8558	2.11918	-14.2259	172.648	9
5	23.2187	18.2018	18.2749		3.14496	2.90152	2.90553	#NUM!	242.17	-2.01352	-0.357491	-0.969412	0.61689	0.91419	2.06025	17.1299	2.3694	3.60722	-2.87392	9.09091

## Sheet: Qst_Cu_MFU-4l
	Units = K		1/T1	1/T2	1/T3	1/T4
T1	203		0.00492611	0.00469484	0.0044843	0.00429185							n min	0.05				-∆H	53.2
T2	213												Interval	0.05				-∆S	156.9
T3	223												Accesible sites	1.55	mmol/g			-∆S corrected	157.9
T4	233												Low-loading	1.5	mmol/g
n (mmol/g)	P (T1)	P (T2)	P (T3)	P (T4)	lnP (T1)	lnP (T2)	lnP (T3)	lnp (T4)	dlnP/dT	∆H	1st derivative	2nd derivative	Qst std error	R2	Y-int	∆S	∆S error	1st derivative	2nd derivative	Surface coverage
0.05	6.25317e-08	2.69617e-07	1.06845e-06	3.42957e-06	-16.5876	-15.1263	-13.7493	-12.5831	-6338.29	52.6997			0.530778	0.999901	15.0431	125.076	2.49742			0.0322581
0.1	1.40517e-07	6.06461e-07	2.4069e-06	7.75423e-06	-15.7779	-14.3156	-12.9372	-11.7673	-6347.6	52.7771	1.25529		0.537572	0.999899	15.8801	132.035	2.52939	111.723		0.0645161
0.15	2.29274e-07	9.90113e-07	3.93328e-06	1.27006e-05	-15.2883	-13.8254	-12.446	-11.2739	-6353.39	52.8253	0.846536	-5.88003	0.542334	0.999897	16.3868	136.248	2.5518	73.0801	-558.759	0.0967742
0.2	3.28402e-07	1.41881e-06	5.64047e-06	1.82444e-05	-14.929	-13.4657	-12.0855	-10.9117	-6357.78	52.8617	0.667288	-2.79128	0.546243	0.999896	16.7591	139.343	2.57019	55.8475	-270.712	0.129032
0.25	4.38269e-07	1.89413e-06	7.53487e-06	2.44063e-05	-14.6404	-13.1768	-11.796	-10.6207	-6361.42	52.892	0.567409	-1.62048	0.549851	0.999894	17.0585	141.833	2.58717	46.0089	-161.76	0.16129
0.3	5.59636e-07	2.41937e-06	9.62974e-06	3.12301e-05	-14.396	-12.932	-11.5507	-10.3741	-6364.6	52.9185	0.505239	-1.0236	0.553257	0.999893	17.3124	143.944	2.60319	39.6716	-107.086	0.193548
0.35	6.93557e-07	2.9991e-06	1.19435e-05	3.87767e-05	-14.1814	-12.7172	-11.3353	-10.1577	-6367.49	52.9425	0.465048	-0.668144	0.556563	0.999892	17.5356	145.8	2.61875	35.3002	-75.3253	0.225806
0.4	8.4137e-07	3.63912e-06	1.44997e-05	4.71238e-05	-13.9882	-12.5238	-11.1414	-9.96273	-6370.2	52.965	0.438425	-0.44546	0.559977	0.999891	17.737	147.474	2.63481	32.139	-55.18	0.258065
0.45	1.00471e-06	4.34654e-06	1.73268e-05	5.63665e-05	-13.8108	-12.3461	-10.9633	-9.78364	-6372.77	52.9864	0.420502	-0.27273	0.563297	0.999889	17.9222	149.014	2.65043	29.7823	-41.2287	0.290323
0.5	1.18557e-06	5.12996e-06	2.04598e-05	6.66206e-05	-13.6453	-12.1804	-10.797	-9.6165	-6375.25	53.007	0.411152	-0.128324	0.566867	0.999888	18.0952	150.452	2.66723	28.0162	-30.983	0.322581
0.55	1.38633e-06	5.9998e-06	2.39407e-05	7.80261e-05	-13.4889	-12.0238	-10.6399	-9.45847	-6377.71	53.0275	0.40767	-0.0315627	0.570447	0.999887	18.2591	151.815	2.68407	26.6839	-23.3862	0.354839
0.6	1.60991e-06	6.96867e-06	2.78207e-05	9.0753e-05	-13.3393	-11.8741	-10.4897	-9.30737	-6380.16	53.0478	0.407996	0.0540611	0.574293	0.999885	18.4161	153.121	2.70217	25.6776	-17.3376	0.387097
0.65	1.85985e-06	8.0519e-06	3.21619e-05	0.000105009	-13.195	-11.7296	-10.3447	-9.16146	-6382.62	53.0683	0.413076	0.151151	0.578468	0.999884	18.5679	154.383	2.72181	24.9502	-12.1339	0.419355
0.7	2.14047e-06	9.26834e-06	3.70407e-05	0.000121048	-13.0545	-11.5889	-10.2035	-9.01932	-6385.12	53.0891	0.423111	0.249168	0.582866	0.999882	18.7162	155.616	2.74251	24.4642	-7.65915	0.451613
0.75	2.45713e-06	1.06412e-05	4.25516e-05	0.000139186	-12.9165	-11.4508	-10.0648	-8.8797	-6387.71	53.1106	0.437993	0.35326	0.587699	0.99988	18.8622	156.83	2.76525	24.1843	-3.68298	0.483871
0.8	2.81653e-06	1.21997e-05	4.88129e-05	0.000159819	-12.78	-11.3141	-9.92752	-8.74147	-6390.39	53.1329	0.458437	0.46406	0.592786	0.999878	19.0071	158.034	2.78918	24.0959	0.102607	0.516129
0.85	3.22714e-06	1.39804e-05	5.59743e-05	0.000183449	-12.6439	-11.1779	-9.79062	-8.60357	-6393.22	53.1564	0.484399	0.590935	0.598612	0.999876	19.152	159.239	2.8166	24.1945	3.96386	0.548387
0.9	3.69981e-06	1.60306e-05	6.42279e-05	0.00021072	-12.5072	-11.041	-9.65307	-8.46498	-6396.22	53.1814	0.51753	0.748469	0.604958	0.999873	19.2981	160.454	2.84646	24.4923	8.0511	0.580645
0.95	4.24864e-06	1.84114e-05	7.38243e-05	0.000242474	-12.3689	-10.9025	-9.51382	-8.32462	-6399.45	53.2082	0.559246	0.929428	0.612235	0.99987	19.4465	161.688	2.8807	24.9996	12.4513	0.612903
1	4.89233e-06	2.12042e-05	8.50957e-05	0.000279829	-12.2278	-10.7613	-9.37173	-8.18133	-6402.94	53.2373	0.610473	1.16832	0.620353	0.999867	19.5987	162.954	2.91889	25.7374	17.4686	0.645161
1.05	5.65615e-06	2.45187e-05	9.84924e-05	0.000324303	-12.0828	-10.6161	-9.22553	-8.03383	-6406.79	53.2692	0.676077	1.49588	0.629658	0.999863	19.7561	164.262	2.96267	26.7465	23.5197	0.677419
1.1	6.57508e-06	2.85067e-05	0.000114639	0.000378009	-11.9322	-10.4654	-9.07372	-7.88059	-6411.08	53.3049	0.760061	1.92216	0.640572	0.999858	19.9204	165.628	3.01403	28.0894	31.0687	0.709677
1.15	7.69887e-06	3.33844e-05	0.000134427	0.000443965	-11.7744	-10.3074	-8.91449	-7.71976	-6415.93	53.3452	0.868293	2.50575	0.65348	0.999853	20.0939	167.071	3.07476	29.8534	40.8739	0.741935
1.2	9.1007e-06	3.94696e-05	0.000159171	0.000526638	-11.6072	-10.14	-8.74553	-7.549	-6421.52	53.3917	1.01064	3.32719	0.66901	0.999846	20.2795	168.614	3.14783	32.1767	54.0993	0.774194
1.25	1.08926e-05	4.72488e-05	0.000190893	0.000632908	-11.4274	-9.96008	-8.5638	-7.36519	-6428.08	53.4463	1.20101	4.52503	0.688198	0.999837	20.4809	170.289	3.23812	35.2633	72.7705	0.806452
1.3	1.32549e-05	5.75046e-05	0.000232858	0.000773929	-11.2311	-9.76365	-8.36508	-7.16403	-6435.96	53.5118	1.46314	6.34752	0.712499	0.999825	20.7036	172.14	3.35246	39.4538	101.023	0.83871
1.35	1.64965e-05	7.15773e-05	0.000290692	0.000968967	-11.0124	-9.54473	-8.14325	-6.93928	-6445.68	53.5926	1.83576	9.09365	0.744352	0.99981	20.9554	174.234	3.50233	45.3656	146.501	0.870968
1.4	2.11925e-05	9.19605e-05	0.000374939	0.0012542	-10.7619	-9.29415	-7.88875	-6.68126	-6458.04	53.6954	2.3725	12.6827	0.788038	0.999787	21.2492	176.677	3.70789	54.1039	225.532	0.903226
1.45	2.85439e-05	0.000123853	0.000507776	0.00170573	-10.4641	-8.99642	-7.58547	-6.37376	-6474.22	53.8299	3.10403	11.1425	0.851639	0.999753	21.6062	179.644	4.00714	67.9187	374.263	0.935484
1.5	4.15227e-05	0.000180076	0.000744527	0.00251197	-10.0893	-8.62213	-7.20276	-5.98669	-6495.38	54.0058	3.48676	-99.0466	0.952722	0.999692	22.0661	183.468	4.48276	91.5302	521.189	0.967742
1.55	6.98842e-05	0.000302356	0.00126729	0.0042709	-9.56867	-8.10391	-6.67087	-5.45593	-6516.15	54.1785	-6.80062	-2448.21	1.13256	0.999568	22.707	188.797	5.32895	120.038	-9470.88	1
1.6	0.000171943	0.000730487	0.00309348	0.00972611	-8.66835	-7.2218	-5.77846	-4.63294	-6413.58	53.3257	-241.334	-3528.75	1.43826	0.9993	23.5098	195.472	6.76731	-855.558	-15057.6	1.03226
1.65	0.00324356	0.00703415	0.0165952	0.0310636	-5.73108	-4.95698	-4.09864	-3.47172	-3613.58	30.0451	-359.675	937.84	1.74666	0.996768	12.4171	103.242	8.21838	-1385.73	3594.46	1.06452
1.7	0.0197577	0.0328	0.051892	0.0736256	-3.92421	-3.41733	-2.95859	-2.60876	-2087.7	17.3582	-147.55	3310.99	0.0305612	0.999997	6.8434	56.8995	0.143797	-496.112	13509	1.09677
1.75	0.0391861	0.0629712	0.0933309	0.125118	-3.23943	-2.76508	-2.3716	-2.0785	-1838.97	15.2901	-28.5763	1354.13	0.435801	0.99929	6.45023	53.6304	2.05054	-34.8311	4975.41	1.12903
1.8	0.0601156	0.0950536	0.137427	0.180985	-2.81149	-2.35331	-1.98466	-1.70934	-1744.01	14.5006	-12.1367	216.193	0.55049	0.998752	6.42448	53.4164	2.59017	1.42914	433.169	1.16129
1.85	0.0822588	0.128645	0.183518	0.239992	-2.49788	-2.0507	-1.69544	-1.42715	-1693	14.0765	-6.95698	74.8987	0.589091	0.998484	6.46742	53.7734	2.7718	8.48588	86.2652	1.19355
1.9	0.105492	0.163596	0.231375	0.301677	-2.24912	-1.81036	-1.46372	-1.1984	-1660.34	13.8049	-4.64685	35.5294	0.599891	0.998359	6.52655	54.265	2.82261	10.0557	16.4601	1.22581
1.95	0.129751	0.199839	0.280902	0.365832	-2.04214	-1.61024	-1.26975	-1.00558	-1637.11	13.6118	-3.40404	19.9419	0.598664	0.99831	6.58836	54.7789	2.81684	10.1319	-3.15117	1.25806
2	0.155005	0.237343	0.332055	0.432356	-1.8643	-1.43825	-1.10245	-0.838506	-1619.4	13.4645	-2.65266	12.4565	0.591594	0.998304	6.6484	55.2782	2.78357	9.74054	-9.00001	1.29032
2.05	0.181238	0.276098	0.384822	0.501204	-1.70794	-1.287	-0.954974	-0.690742	-1605.21	13.3465	-2.15839	8.39186	0.581623	0.998322	6.70551	55.753	2.73666	9.23188	-10.2872	1.32258
2.1	0.208447	0.316108	0.43921	0.572366	-1.56807	-1.15167	-0.822778	-0.557977	-1593.44	13.2486	-1.81347	5.96629	0.57018	0.998354	6.75944	56.2013	2.68282	8.71181	-10.1065	1.35484
2.15	0.236636	0.357386	0.495236	0.645854	-1.44123	-1.02894	-0.702721	-0.437182	-1583.4	13.1652	-1.56176	4.41257	0.55811	0.998394	6.81029	56.6242	2.62602	8.22123	-9.45122	1.3871
2.2	0.265816	0.399952	0.552928	0.721694	-1.32495	-0.916411	-0.592527	-0.326154	-1574.65	13.0925	-1.37221	3.36403	0.545813	0.998438	6.85832	57.0235	2.56816	7.76669	-8.68557	1.41935
2.25	0.296004	0.443832	0.612319	0.799927	-1.21738	-0.812309	-0.490502	-0.223235	-1566.9	13.028	-1.22536	2.63764	0.533535	0.998484	6.9037	57.4008	2.51039	7.35268	-7.84114	1.45161
2.3	0.32722	0.489056	0.673451	0.880601	-1.11712	-0.715278	-0.39534	-0.127151	-1559.92	12.9699	-1.10845	2.12246	0.521369	0.998532	6.94675	57.7587	2.45315	6.98258	-7.02746	1.48387
2.35	0.359487	0.53566	0.736368	0.963775	-1.02308	-0.624256	-0.306025	-0.0368974	-1553.56	12.9171	-1.01311	1.72275	0.509505	0.998579	6.98768	58.0991	2.39733	6.64993	-6.31619	1.51613
2.4	0.392833	0.583682	0.801123	1.04952	-0.934371	-0.538399	-0.221741	0.0483329	-1547.73	12.8686	-0.936175	1.41313	0.497887	0.998626	7.02673	58.4237	2.34266	6.35096	-5.71137	1.54839
2.45	0.427288	0.633166	0.867771	1.13789	-0.850297	-0.457023	-0.141827	0.129176	-1542.3	12.8235	-0.871798	1.20174	0.486605	0.998672	7.06407	58.7342	2.28958	6.07879	-5.19845	1.58065
2.5	0.462886	0.684158	0.936371	1.22899	-0.770274	-0.379566	-0.0657435	0.206193	-1537.25	12.7814	-0.816001	1.02694	0.47565	0.998717	7.09984	59.0316	2.23803	5.83111	-4.66966	1.6129
2.55	0.499664	0.736708	1.00699	1.3229	-0.693819	-0.305564	0.00696568	0.279826	-1532.49	12.7419	-0.769104	0.857349	0.464977	0.998761	7.1342	59.3173	2.18782	5.61183	-4.27561	1.64516
2.6	0.53766	0.79087	1.0797	1.41971	-0.620529	-0.234622	0.0766832	0.350453	-1528	12.7045	-0.730266	0.731497	0.454594	0.998803	7.16733	59.5928	2.13896	5.40355	-3.95982	1.67742
2.65	0.576917	0.846702	1.15456	1.51951	-0.550057	-0.166406	0.143719	0.418388	-1523.71	12.6689	-0.695955	0.652013	0.444644	0.998844	7.19919	59.8577	2.09214	5.21585	-3.47847	1.70968
2.7	0.617481	0.904266	1.23167	1.62243	-0.482107	-0.100632	0.208371	0.483925	-1519.63	12.6349	-0.665065	0.55763	0.434903	0.998883	7.23006	60.1144	2.04631	5.05571	-3.23424	1.74194
2.75	0.659401	0.963627	1.31111	1.72857	-0.416423	-0.037051	0.270874	0.547294	-1515.71	12.6024	-0.640192	0.475197	0.425393	0.998921	7.25999	60.3632	2.00156	4.89242	-3.09662	1.77419
2.8	0.702729	1.02486	1.39295	1.83805	-0.352784	0.024556	0.331424	0.608705	-1511.93	12.5709	-0.617545	0.436608	0.41638	0.998957	7.28891	60.6036	1.95916	4.74604	-2.73659	1.80645
2.85	0.74752	1.08803	1.47731	1.95101	-0.290994	0.0843687	0.390223	0.668347	-1508.28	12.5406	-0.596531	0.387118	0.407445	0.998993	7.31708	60.8378	1.91711	4.61876	-2.51801	1.83871
2.9	0.793835	1.15322	1.56428	2.06759	-0.23088	0.142558	0.447426	0.726384	-1504.75	12.5113	-0.578833	0.32821	0.398737	0.999027	7.34446	61.0655	1.87614	4.49424	-2.37886	1.87097
2.95	0.841737	1.22051	1.65397	2.18793	-0.172288	0.199269	0.503178	0.782956	-1501.32	12.4827	-0.56371	#NUM!	0.39016	0.99906	7.37113	61.2873	1.83578	4.38088	#NUM!	1.90323
3	0.891292	1.29001	1.74649	2.31219	-0.115083	0.25465	0.557608	0.838195	-1497.97	12.4549	#NUM!	#NUM!	0.382109	0.999091	7.39715	61.5036	1.7979	#NUM!	#NUM!	1.93548
3.05					#NUM!	#NUM!	#NUM!	#NUM!	#NUM!	#NUM!	#NUM!	#NUM!	#VALUE!	#VALUE!	#NUM!	#NUM!	#VALUE!	#NUM!	#NUM!	1.96774
3.1					#NUM!	#NUM!	#NUM!	#NUM!	#NUM!	#NUM!	#NUM!	#NUM!	#VALUE!	#VALUE!	#NUM!	#NUM!	#VALUE!	#NUM!	#NUM!	2
3.15	1.05063	1.51265	2.07035	2.74488	0.04939	0.413863	0.727718	1.00974	-1512.83	12.5784	#NUM!	#NUM!	0.203817	0.999745	7.619	63.3481	0.959003	#NUM!	#NUM!	2.03226
3.2	1.10757	1.59194	2.17776	2.89	0.102168	0.464953	0.778297	1.06126	-1510.69	12.5606	-0.353532	#NUM!	0.19216	0.999772	7.6469	63.5801	0.904151	4.59995	#NUM!	2.06452
3.25	1.16658	1.67397	2.28883	3.04019	0.154076	0.515198	0.828041	1.11192	-1508.58	12.5431	-0.348108	0.113718	0.18064	0.999797	7.67432	63.8081	0.849948	4.52617	-1.36862	2.09677
3.3	1.22775	1.75887	2.40372	3.1957	0.205183	0.564672	0.877018	1.16181	-1506.5	12.5258	-0.34216	0.109313	0.169385	0.999821	7.70133	64.0327	0.796993	4.46309	-1.22005	2.12903
3.35	1.29119	1.84679	2.52263	3.3568	0.255564	0.613449	0.925302	1.21099	-1504.46	12.5089	-0.337177	0.0947691	0.158395	0.999842	7.728	64.2545	0.745282	4.40416	-1.13186	2.16129
3.4	1.35702	1.93786	2.64576	3.52376	0.305291	0.661584	0.972958	1.25953	-1502.45	12.4921	-0.332683	0.0793548	0.14737	0.999863	7.7543	64.4731	0.693407	4.3499	-1.07425	2.19355
3.45	1.42535	2.03225	2.77331	3.69687	0.354417	0.709144	1.02004	1.30749	-1500.46	12.4756	-0.329241	0.0662933	0.136567	0.999881	7.78032	64.6894	0.642577	4.29674	-1.01412	2.22581
3.5	1.49633	2.13013	2.90552	3.87646	0.403015	0.756183	1.06661	1.35492	-1498.49	12.4592	-0.326054	0.0747424	0.125766	0.999899	7.80598	64.9028	0.591757	4.24849	-0.813883	2.25806
3.55	1.57008	2.23168	3.04262	4.06286	0.451127	0.802755	1.11272	1.40189	-1496.54	12.443	-0.321767	0.0718757	0.115122	0.999915	7.83141	65.1143	0.541675	4.21535	-0.670366	2.29032
3.6	1.64675	2.33711	3.18488	4.25645	0.498804	0.848915	1.15841	1.44844	-1494.62	12.427	-0.318866	0.0467973	0.104713	0.999929	7.85668	65.3244	0.492696	4.18145	-0.695525	2.32258
3.65	1.72652	2.44661	3.33259	4.45761	0.546108	0.894703	1.20375	1.49461	-1492.71	12.4111	-0.317087	0.0446701	0.0941772	0.999942	7.8817	65.5324	0.443123	4.1458	-0.605905	2.35484
3.7	1.80955	2.56042	3.48603	4.66676	0.593078	0.940171	1.24876	1.54047	-1490.81	12.3953	-0.314399	0.0496974	0.0837925	0.999954	7.90654	65.7389	0.394261	4.12086	-0.445148	2.3871
3.75	1.89602	2.67878	3.64553	4.88436	0.639757	0.985361	1.2935	1.58604	-1488.92	12.3797	-0.312118	0.032978	0.0735263	0.999964	7.93127	65.9445	0.345957	4.10128	-0.41483	2.41935
3.8	1.98615	2.80196	3.81146	5.11091	0.686198	1.03032	1.33801	1.63138	-1487.05	12.3641	-0.311101	0.0204476	0.063259	0.999973	7.95587	66.1491	0.297647	4.07938	-0.396501	2.45161
3.85	2.08015	2.93024	3.98417	5.34692	0.73244	1.07508	1.38233	1.67652	-1485.18	12.3486	-0.310073	0.0259695	0.0530758	0.999981	7.98033	66.3525	0.249733	4.06163	-0.264772	2.48387
3.9	2.17825	3.06392	4.16407	5.59296	0.778522	1.1197	1.42649	1.72151	-1483.32	12.3331	-0.308505	0.0227669	0.042934	0.999988	8.00472	66.5552	0.202014	4.0529	-0.182758	2.51613
3.95	2.28071	3.20333	4.35162	5.84967	0.824487	1.16419	1.47055	1.76639	-1481.47	12.3177	-0.307796	0.00535505	0.0327382	0.999993	8.02908	66.7577	0.15404	4.04336	-0.17108	2.54839
4	2.38781	3.34884	4.54727	6.1177	0.870377	1.20861	1.51453	1.81119	-1479.62	12.3023	-0.307969	0.00191405	0.0226112	0.999997	8.05335	66.9596	0.10639	4.0358	-0.0850545	2.58065
4.05	2.49985	3.50084	4.75156	6.39778	0.916231	1.253	1.55847	1.85595	-1477.77	12.2869	-0.307605	0.00518751	0.0124855	0.999999	8.07761	67.1613	0.0587467	4.03485	0.0209038	2.6129
4.1	2.61715	3.65974	4.96503	6.69071	0.962086	1.29739	1.60242	1.90072	-1475.92	12.2715	-0.30745	-0.00217394	0.00234882	1	8.10188	67.363	0.0110517	4.03789	0.100857	2.64516
4.15	2.74007	3.82602	5.18831	6.99734	1.00798	1.34183	1.64641	1.94553	-1474.07	12.2562	-0.307822	-0.00762474	0.00775517	1	8.12618	67.5651	0.0364897	4.04494	0.178911	2.67742
4.2	2.869	4.00016	5.42206	7.31861	1.05396	1.38633	1.69048	1.99042	-1472.22	12.2408	-0.308213	-0.0136902	0.0179565	0.999998	8.15052	67.7675	0.0844889	4.05578	0.238181	2.70968
4.25	3.00436	4.18273	5.66701	7.65555	1.10006	1.43096	1.73466	2.03543	-1470.36	12.2253	-0.309191	-0.0232358	0.0281339	0.999994	8.17496	67.9707	0.132376	4.06875	0.273336	2.74194
4.3	3.14663	4.37433	5.92396	8.00929	1.14633	1.47575	1.77901	2.0806	-1468.5	12.2098	-0.310536	-0.0278322	0.0383638	0.99999	8.19946	68.1744	0.18051	4.08311	0.348076	2.77419
4.35	3.29631	4.57562	6.19377	8.38106	1.1928	1.52074	1.82354	2.12597	-1466.63	12.1943	-0.311975	-0.0311837	0.0485915	0.999983	8.22407	68.379	0.228633	4.10356	0.449436	2.80645
4.4	3.45397	4.78732	6.47742	8.77221	1.23952	1.56597	1.86832	2.17159	-1464.75	12.1786	-0.313655	-0.037404	0.0589135	0.999975	8.24881	68.5848	0.277201	4.12805	0.517828	2.83871
4.45	3.62023	5.01023	6.77596	9.18425	1.28654	1.61148	1.91338	2.21749	-1462.86	12.1629	-0.315715	-0.0440378	0.0693165	0.999965	8.27372	68.7918	0.326149	4.15534	0.575111	2.87097
4.5	3.79578	5.24524	7.09056	9.61882	1.33389	1.65732	1.95876	2.26372	-1460.95	12.1471	-0.318058	-0.0543293	0.0797921	0.999954	8.29879	69.0003	0.375439	4.18556	0.67928	2.90323
4.55	3.98139	5.49334	7.42252	10.0778	1.38163	1.70354	2.00452	2.31033	-1459.03	12.1311	-0.321148	-0.0651324	0.0903369	0.999941	8.32406	69.2104	0.425054	4.22327	0.795634	2.93548
4.6	4.17789	5.7556	7.77328	10.5631	1.42981	1.75017	2.05069	2.35737	-1457.09	12.115	-0.324572	-0.0665253	0.100991	0.999925	8.34959	69.4226	0.475183	4.26513	0.860082	2.96774
4.65	4.38624	6.03324	8.14443	11.0771	1.47847	1.79728	2.09733	2.40488	-1455.13	12.0987	-0.3278	-0.0616336	0.111754	0.999908	8.37535	69.6369	0.525824	4.30928	0.958557	3
4.7	4.60749	6.32762	8.53776	11.6223	1.52768	1.84492	2.1445	2.45293	-1453.15	12.0822	-0.330735	-0.0662163	0.122603	0.999888	8.40141	69.8536	0.576871	4.36098	1.08552	3.03226
4.75	4.84282	6.64023	8.95527	12.2016	1.5775	1.89315	2.19224	2.50157	-1451.15	12.0656	-0.334422	-0.0985856	0.133627	0.999867	8.4278	70.073	0.628745	4.41783	1.17444	3.06452
4.8	5.09357	6.9728	9.39921	12.8181	1.62798	1.94202	2.24063	2.55086	-1449.12	12.0487	-0.340594	-0.111848	0.144769	0.999842	8.45455	70.2953	0.681169	4.47843	1.27074	3.09677
4.85	5.36125	7.32724	9.87211	13.4753	1.6792	1.9916	2.28971	2.60086	-1447.05	12.0315	-0.345607	-0.0962239	0.156083	0.999815	8.48167	70.5208	0.734404	4.54491	1.41592	3.12903
4.9	5.64754	7.70571	10.3768	14.1775	1.73122	2.04196	2.33957	2.65166	-1444.97	12.0142	-0.350216	-0.113866	0.167536	0.999786	8.50921	70.7498	0.788292	4.62002	1.60234	3.16129
4.95	5.95441	8.11069	10.9166	14.9292	1.78413	2.09318	2.39028	2.70332	-1442.84	11.9965	-0.356993	27.7375	0.179242	0.999753	8.53723	70.9828	0.84337	4.70514	97.1995	3.19355
5	6.28405	8.54498	11.4952	15.7356	1.83801	2.14534	2.44193	2.75593	-1440.67	11.9785	2.42354	-0.0721199	0.19119	0.999717	8.5658	71.2203		14.34	0.950533	3.22581

## Sheet: Qst_Fe-BTTri
	Units = K		1/T1	1/T2	1/T3	1/T4
T1	195		0.00512821	0.00471698	0.00446429								n min	0.05				-∆H	50.5
T2	212												Interval	0.05				-∆S	175.2
T3	224																	-∆S corrected	176.4
T4																		Accesible sites	2.3	mmol/g
																		Low-loading	1.8	mmol/g
n (mmol/g)	P (T1)	P (T2)	P (T3)	P (T4)	lnP (T1)	lnP (T2)	lnP (T3)	lnp (T4)	dlnP/dT	∆H	1st derivative	2nd derivative	Qst std error	R2	Y-int	∆S	∆S std erro	1st derivative	2nd derivative	Surface coverage
0.05	5.78255e-07	7.11415e-06	3.32488e-05		-14.3633	-11.8534	-10.3115	#NUM!	-6102.84	50.742			0.00302956	1	16.9334	140.793	0.0144742			0.0217391
0.1	1.50573e-06	1.85229e-05	8.65446e-05		-13.4062	-10.8965	-9.35485	#NUM!	-6102.3	50.7376	-0.0831902		0.00497887	1	17.8877	148.727	0.0237874	126.779		0.0434783
0.15	2.67011e-06	3.28442e-05	0.000153419		-12.8334	-10.3237	-8.78234	#NUM!	-6101.84	50.7337	-0.0760659	0.0751996	0.00681372	1	18.4582	153.471	0.0325537	81.8312	-651.044	0.0652174
0.2	4.04753e-06	4.97835e-05	0.000232489		-12.4174	-9.90783	-8.36667	#NUM!	-6101.39	50.73	-0.0756703	-0.0145781	0.00848284	1	18.8719	156.911	0.0405282	61.6747	-317.585	0.0869565
0.25	5.6322e-06	6.9269e-05	0.000323407		-12.087	-9.57751	-8.0366	#NUM!	-6100.93	50.7262	-0.0775237	-0.0545061	0.0102089	1	19.2	159.638	0.0487749	50.0727	-191.616	0.108696
0.3	7.42654e-06	9.13297e-05	0.000426298		-11.8105	-9.30103	-7.76037	#NUM!	-6100.45	50.7222	-0.0811209	-0.0958896	0.0119802	1	19.4741	161.918	0.0572373	42.5131	-128.77	0.130435
0.35	9.43808e-06	0.000116057	0.000541572		-11.5708	-9.06143	-7.52103	#NUM!	-6099.95	50.718	-0.0871127	-0.121882	0.0138657	1	19.7113	163.889	0.0662456	37.1956	-92.4748	0.152174
0.4	1.16782e-05	0.000143589	0.000669857		-11.3578	-8.84856	-7.30845	#NUM!	-6099.41	50.7135	-0.0933091	-0.128684	0.0158464	1	19.9215	165.637	0.0757087	33.2657	-69.431	0.173913
0.45	1.41615e-05	0.000174105	0.000811967		-11.165	-8.65585	-7.11605	#NUM!	-6098.83	50.7087	-0.0999811	-0.155988	0.018016	1	20.1114	167.216	0.0860746	30.2525	-53.9509	0.195652
0.5	1.69059e-05	0.000207824	0.000968893		-10.9878	-8.47882	-6.93936	#NUM!	-6098.2	50.7035	-0.108908	-0.200159	0.0204371	1	20.2854	168.663	0.0976414	27.8706	-43.0678	0.217391
0.55	1.99327e-05	0.000245003	0.00114181		-10.8231	-8.31424	-6.77514	#NUM!	-6097.52	50.6978	-0.119997	-0.230579	0.02298	1	20.4466	170.003	0.109791	25.9458	-35.0165	0.23913
0.6	2.32667e-05	0.000285946	0.00133208		-10.6685	-8.15971	-6.62101	#NUM!	-6096.76	50.6915	-0.131966	-0.261543	0.0258484	1	20.5974	171.257	0.123495	24.3689	-28.9098	0.26087
0.65	2.69366e-05	0.000331001	0.00154129		-10.522	-8.01339	-6.47514	#NUM!	-6095.93	50.6846	-0.146151	-0.30015	0.0289388	1	20.7397	172.44	0.13826	23.0548	-24.1856	0.282609
0.7	3.09758e-05	0.000380574	0.00177125		-10.3823	-7.87383	-6.33607	#NUM!	-6095	50.6769	-0.161981	-0.345083	0.0324062	1	20.8747	173.563	0.154826	21.9504	-20.4564	0.304348
0.75	3.54226e-05	0.000435131	0.00202407		-10.2482	-7.73986	-6.20264	#NUM!	-6093.98	50.6684	-0.18066	-0.408984	0.0362099	0.999999	21.0037	174.635	0.172999	21.0091	-17.5246	0.326087
0.8	4.03216e-05	0.000495211	0.00230213		-10.1186	-7.61053	-6.07392	#NUM!	-6092.83	50.6588	-0.202879	-0.468659	0.0405095	0.999999	21.1274	175.664	0.193541	20.1979	-15.0928	0.347826
0.85	4.57242e-05	0.000561437	0.00260822		-9.99288	-7.48501	-5.94909	#NUM!	-6091.54	50.6481	-0.227525	-0.543639	0.0452938	0.999999	21.2466	176.655	0.216399	19.4998	-13.1278	0.369565
0.9	5.16903e-05	0.000634533	0.00294553		-9.87024	-7.36262	-5.82747	#NUM!	-6090.09	50.6361	-0.257243	-0.642387	0.0506877	0.999999	21.3619	177.614	0.242169	18.8851	-11.5759	0.391304
0.95	5.82898e-05	0.00071534	0.00331775		-9.75008	-7.24275	-5.70847	#NUM!	-6088.45	50.6224	-0.291764	-0.753014	0.0567827	0.999999	21.4737	178.543	0.271289	18.3423	-10.3053	0.413043
1	6.56044e-05	0.000804843	0.00372918		-9.63187	-7.12486	-5.59157	#NUM!	-6086.59	50.6069	-0.332545	-0.891109	0.0637019	0.999998	21.5825	179.448	0.304346	17.8546	-9.33419	0.434783
1.05	7.37306e-05	0.000904198	0.0041848		-9.51509	-7.00846	-5.4763	#NUM!	-6084.45	50.5892	-0.380875	-1.05773	0.0716194	0.999998	21.6885	180.329	0.342174	17.4088	-8.62655	0.456522
1.1	8.27824e-05	0.00101477	0.00469047		-9.3993	-6.89309	-5.36222	#NUM!	-6082	50.5688	-0.438318	-1.26305	0.080687	0.999997	21.7919	181.189	0.385496	16.9919	-8.19449	0.478261
1.15	9.28956e-05	0.00113817	0.00525302		-9.28403	-6.77833	-5.24895	#NUM!	-6079.18	50.5453	-0.50718	-1.50835	0.0910717	0.999997	21.8928	182.028	0.43511	16.5894	-8.00294	0.5
1.2	0.000104233	0.00127633	0.00588055		-9.16888	-6.66377	-5.1361	#NUM!	-6075.9	50.5181	-0.589153	-1.82763	0.103027	0.999996	21.9914	182.848	0.49223	16.1916	-8.19135	0.521739
1.25	0.000116991	0.00143159	0.00658262		-9.05341	-6.54897	-5.02332	#NUM!	-6072.09	50.4864	-0.689943	-2.24761	0.117108	0.999995	22.0876	183.647	0.559501	15.7702	-8.86619	0.543478
1.3	0.00013141	0.00160673	0.00737061		-8.93719	-6.43355	-4.91025	#NUM!	-6067.61	50.4491	-0.813913	-2.7425	0.133369	0.999993	22.1811	184.425	0.637193	15.305	-9.8753	0.565217
1.35	0.000147784	0.0018052	0.00825813		-8.81976	-6.31708	-4.79656	#NUM!	-6062.3	50.405	-0.964193	-3.37555	0.152559	0.999991	22.2717	185.178	0.728876	14.7827	-11.496	0.586957
1.4	0.000166476	0.0020312	0.00926153		-8.70066	-6.19913	-4.68189	#NUM!	-6056.01	50.3527	-1.15147	-4.2153	0.175248	0.999988	22.3589	185.903	0.837274	14.1554	-14.0196	0.608696
1.45	0.000187945	0.00228997	0.0104005		-8.57936	-6.07922	-4.5659	#NUM!	-6048.45	50.2899	-1.38572	-5.29474	0.202281	0.999984	22.4419	186.593	0.966429	13.3808	-17.5812	0.630435
1.5	0.00021277	0.00258806	0.0116991		-8.4553	-5.95685	-4.44824	#NUM!	-6039.34	50.2141	-1.68094	-6.7423	0.234554	0.999978	22.5198	187.241	1.12062	12.3973	-22.7693	0.652174
1.55	0.000241696	0.00293378	0.0131863		-8.32783	-5.83146	-4.32858	#NUM!	-6028.24	50.1218	-2.05995	-8.67004	0.273536	0.99997	22.591	187.833	1.30686	11.1038	-30.0672	0.673913
1.6	0.000275696	0.00333776	0.0148976		-8.19621	-5.70246	-4.20656	#NUM!	-6014.57	50.0081	-2.54795	-11.2254	0.320849	0.999959	22.6534	188.351	1.53291	9.39059	-40.1334	0.695652
1.65	0.00031606	0.0038138	0.0168766		-8.05958	-5.56913	-4.08183	#NUM!	-5997.59	49.867	-3.1825	-14.7132	0.378563	0.999942	22.704	188.772	1.80865	7.09049	-54.3811	0.717391
1.7	0.000364531	0.00438002	0.0191765		-7.9169	-5.4307	-3.95407	#NUM!	-5976.29	49.6899	-4.01926	-19.5226	0.449379	0.999918	22.7386	189.06	2.14698	3.95248	-74.6047	0.73913
1.75	0.000423517	0.00506055	0.0218621		-7.76692	-5.28628	-3.823	#NUM!	-5949.25	49.4651	-5.13475	-26.1935	0.536716	0.999882	22.7515	189.167	2.56425	-0.369976	-103.297	0.76087
1.8	0.000496427	0.00588796	0.0250121		-7.60807	-5.13485	-3.6884	#NUM!	-5914.54	49.1764	-6.63862	-35.5447	0.644626	0.999828	22.7342	189.023	3.07981	-6.37723	-144.268	0.782609
1.85	0.00058823	0.00690685	0.0287206		-7.43839	-4.97524	-3.55014	#NUM!	-5869.41	48.8012	-8.68923	-48.7776	0.777849	0.999746	22.6748	188.53	3.7163	-14.7968	-203.132	0.804348
1.9	0.000706418	0.00817893	0.0330984		-7.2553	-4.80619	-3.40827	#NUM!	-5810.03	48.3075	-11.5164	-67.6814	0.94089	0.999621	22.5562	187.544	4.49526	-26.6904	-288.263	0.826087
1.95	0.000862741	0.00979038	0.0382713		-7.0554	-4.62636	-3.26306	#NUM!	-5730.9	47.6496	-15.4574	-94.931	1.13683	0.999431	22.3538	185.86	5.43138	-43.6231	-412.191	0.847826
2	0.00107654	0.0118616	0.0443763		-6.834	-4.43445	-3.11505	#NUM!	-5624.12	46.7617	-21.0095	-134.418	1.36344	0.999151	22.0316	183.181	6.51405	-67.9094	-593.174	0.869565
2.05	0.00138153	0.0145584	0.0515529		-6.58456	-4.22959	-2.96515	#NUM!	-5478.21	45.5486	-28.8992	-191.408	1.60574	0.998759	21.537	179.07	7.67168	-102.94	-855.948	0.891304
2.1	0.0018405	0.0181004	0.0599293		-6.29772	-4.01182	-2.81459	#NUM!	-5276.54	43.8718	-40.1503	-269.925	1.82337	0.998276	20.7935	172.887	8.71145	-153.504	-1219.68	0.913043
2.15	0.0025796	0.0227549	0.0696066		-5.96012	-3.78297	-2.6649	#NUM!	-4995.32	41.5336	-55.8917	-356.221	1.93171	0.997842	19.6908	163.719	9.22906	-224.908	-1622.15	0.934783
2.2	0.00386847	0.0287982	0.0806433		-5.5549	-3.54744	-2.51772	#NUM!	-4604.32	38.2827	-75.7724	-372.129	1.79178	0.997814	18.0885	150.397	8.56055	-315.719	-1706.21	0.956522
2.25	0.00626886	0.0364373	0.0930467		-5.07216	-3.31216	-2.37465	#NUM!	-4083.99	33.9563	-93.1045	-190.194	1.26575	0.998612	15.8936	132.147	6.04734	-395.529	-888.443	0.978261
2.3	0.0106127	0.0457265	0.106774		-4.5457	-3.08508	-2.23704	#NUM!	-3484.54	28.9722	-94.7919	147.673	0.435203	0.999774	13.3314	110.844	2.07925	-404.563	642.785	1
2.35	0.0171844	0.0565459	0.121742		-4.06375	-2.8727	-2.10585	#NUM!	-2943.91	24.4771	-78.3372	381.452	0.307252	0.999842	11.0278	91.6909	1.46795	-331.25	1703.34	1.02174
2.4	0.0252836	0.0686611	0.137843		-3.6776	-2.67857	-1.98164	#NUM!	-2542.36	21.1385	-56.6467	387.677	0.729855	0.998809	9.34736	77.7186	3.487	-234.229	1730.14	1.04348
2.45	0.0341612	0.0818109	0.154959		-3.37666	-2.50334	-1.86459	#NUM!	-2262.61	18.8125	-39.5695	286.016	0.897422	0.99773	8.21072	68.268	4.28758	-158.236	1267.82	1.06522
2.5	0.0434241	0.0957655	0.172977		-3.13674	-2.34585	-1.7546	#NUM!	-2066.45	17.1815	-28.0451	191.529	0.9252	0.997109	7.44423	61.895	4.4203	-107.447	839.753	1.08696
2.55	0.0528994	0.110347	0.191792		-2.93936	-2.20413	-1.65134	#NUM!	-1925.31	16.008	-20.4166	127.788	0.887598	0.996935	6.91843	57.5233	4.24064	-74.2606	552.467	1.1087
2.6	0.0625111	0.125424	0.211314		-2.77241	-2.07606	-1.55441	#NUM!	-1820.9	15.1399	-15.2664	87.2525	0.823929	0.997047	6.55108	54.469	3.93646	-52.2007	371.023	1.13043
2.65	0.0722257	0.140908	0.231465		-2.62796	-1.95965	-1.46333	#NUM!	-1741.7	14.4813	-11.6914	61.249	0.752817	0.997305	6.2906	52.3032	3.59671	-37.1583	255.593	1.15217
2.7	0.0820284	0.156733	0.252185		-2.50069	-1.85321	-1.37759	#NUM!	-1680.29	13.9707	-9.14145	44.1284	0.683374	0.997613	6.10417	50.7531	3.26493	-26.6413	180.32	1.17391
2.75	0.0919139	0.172858	0.273422		-2.3869	-1.75528	-1.29674	#NUM!	-1631.75	13.5672	-7.27851	32.5398	0.618968	0.997923	5.97018	49.6391	2.95722	-19.1263	129.918	1.19565
2.8	0.101881	0.189251	0.295136		-2.28395	-1.66468	-1.22032	#NUM!	-1592.75	13.2429	-5.88747	24.4859	0.560998	0.998209	5.87414	48.8405	2.68026	-13.6495	95.3084	1.21739
2.85	0.111932	0.205894	0.317297		-2.18986	-1.58039	-1.14792	#NUM!	-1560.94	12.9784	-4.82992	18.7631	0.509455	0.998461	5.80602	48.2741	2.43401	-9.59548	71.0351	1.23913
2.9	0.12207	0.222773	0.339879		-2.10316	-1.5016	-1.07917	#NUM!	-1534.66	12.7599	-4.01116	14.6261	0.463933	0.99868	5.75873	47.881	2.21652	-6.54603	53.7393	1.26087
2.95	0.132298	0.239881	0.362865		-2.0227	-1.42761	-1.01372	#NUM!	-1512.7	12.5773	-3.3673	82.7465	0.423755	0.998866	5.72729	47.6195	2.02456	-4.22155	226.882	1.28261
3	0.14262	0.257211	0.38624		-1.94757	-1.35786	-0.951296	#NUM!	-1494.16	12.4232	4.2635	-2.54521	0.388384	0.999024	5.70796	47.4588	1.85557	16.1422	-6.79361	1.30435
											4.14106	#DIV/0!						15.8196	#DIV/0!	0
											#DIV/0!	#DIV/0!						#DIV/0!	#DIV/0!	0
											#DIV/0!	#DIV/0!						#DIV/0!	#DIV/0!	0
											#DIV/0!	#DIV/0!						#DIV/0!	#DIV/0!	0
											#DIV/0!	#DIV/0!						#DIV/0!	#DIV/0!	0
											#DIV/0!	#DIV/0!						#DIV/0!	#DIV/0!	0
											#DIV/0!	#DIV/0!						#DIV/0!	#DIV/0!	0
											#DIV/0!	#DIV/0!						#DIV/0!	#DIV/0!	0
											#DIV/0!	#DIV/0!						#DIV/0!	#DIV/0!	0
											#DIV/0!	#DIV/0!						#DIV/0!	#DIV/0!	0
											#DIV/0!	#DIV/0!						#DIV/0!	#DIV/0!	0
											#DIV/0!	#DIV/0!						#DIV/0!	#DIV/0!	0
											#DIV/0!	#DIV/0!						#DIV/0!	#DIV/0!	0
											#DIV/0!	#DIV/0!						#DIV/0!	#DIV/0!	0
											#DIV/0!	#DIV/0!						#DIV/0!	#DIV/0!	0
											#DIV/0!	#DIV/0!						#DIV/0!	#DIV/0!	0
											#DIV/0!	#DIV/0!						#DIV/0!	#DIV/0!	0
											#DIV/0!	#DIV/0!						#DIV/0!	#DIV/0!	0
											#DIV/0!	#DIV/0!						#DIV/0!	#DIV/0!	0
											#DIV/0!	#DIV/0!						#DIV/0!	#DIV/0!	0
											#DIV/0!	#DIV/0!						#DIV/0!	#DIV/0!	0
											#DIV/0!	#DIV/0!						#DIV/0!	#DIV/0!	0
											#DIV/0!	#DIV/0!						#DIV/0!	#DIV/0!	0
											#DIV/0!	#DIV/0!						#DIV/0!	#DIV/0!	0
											#DIV/0!	#DIV/0!						#DIV/0!	#DIV/0!	0
											#DIV/0!	#DIV/0!						#DIV/0!	#DIV/0!	0
											#DIV/0!	#DIV/0!						#DIV/0!	#DIV/0!	0
											#DIV/0!	#DIV/0!						#DIV/0!	#DIV/0!	0
											#DIV/0!	#DIV/0!						#DIV/0!	#DIV/0!	0
											#DIV/0!	#DIV/0!						#DIV/0!	#DIV/0!	0
											#DIV/0!	#DIV/0!						#DIV/0!	#DIV/0!	0
											#DIV/0!	#DIV/0!						#DIV/0!	#DIV/0!	0
											#DIV/0!	#DIV/0!						#DIV/0!	#DIV/0!	0
											#DIV/0!	#DIV/0!						#DIV/0!	#DIV/0!	0
											#DIV/0!	#DIV/0!						#DIV/0!	#DIV/0!	0
											#DIV/0!	#DIV/0!						#DIV/0!	#DIV/0!	0
											#DIV/0!	#DIV/0!						#DIV/0!	#DIV/0!	0
											#DIV/0!	#DIV/0!						#DIV/0!	#DIV/0!	0
											#DIV/0!	#DIV/0!						#DIV/0!	#DIV/0!	0
											#DIV/0!	#DIV/0!						#DIV/0!	#DIV/0!	0

## Sheet: Qst_Cobbta
	Units = K		1/T1	1/T2	1/T3	1/T4
T1	195		0.00512821	0.00469484	0.0044843								n min	0.05				-∆H	47.2
T2	213												Interval	0.05				-∆S	179.5
T3	223																	-∆S corrected	180.7
T4																		Accesible sites	2.45	mmol/g
																		Low-loading	1.8	mmol/g
n (mmol/g)	P (T1)	P (T2)	P (T3)	P (T4)	lnP (T1)	lnP (T2)	lnP (T3)	lnp (T4)	dlnP/dT	∆H	1st derivative	2nd derivative	Qst std error	R2	Y-int	∆S	∆S std erro	1st derivative	2nd derivative	Surface coverage
0.05	2.3467e-05	0.000260668	0.00104671		-10.6599	-8.25226	-6.8621	#NUM!	-5847	48.6149			2.12804	0.998088	19.2936	160.416	10.1649			0.0204082
0.1	4.79169e-05	0.000531699	0.00213172		-9.94604	-7.53943	-6.15083	#NUM!	-5843.21	48.5834	-0.64869		2.11794	0.998103	19.9882	166.192	10.1167	91.5254		0.0408163
0.15	7.34125e-05	0.000813703	0.003257		-9.51942	-7.11392	-5.72695	#NUM!	-5839.2	48.55	-0.686386	-0.769165	2.10731	0.99812	20.3944	169.569	10.0658	57.6948	-491.137	0.0612245
0.2	0.000100022	0.00110734	0.00442468		-9.21012	-6.80579	-5.42056	#NUM!	-5834.95	48.5147	-0.725607	-0.834629	2.09613	0.998137	20.6821	171.961	10.0125	42.4117	-241.886	0.0816327
0.25	0.000127818	0.0014133	0.00563697		-8.9649	-6.56183	-5.17841	#NUM!	-5830.47	48.4774	-0.769849	-0.91501	2.08445	0.998155	20.9045	173.81	9.95667	33.5062	-147.989	0.102041
0.3	0.000156884	0.00173237	0.00689627		-8.76	-6.35826	-4.97677	#NUM!	-5825.7	48.4377	-0.817108	-0.977111	2.0721	0.998173	21.0851	175.312	9.89768	27.6128	-101.202	0.122449
0.35	0.000187305	0.00206536	0.00820511		-8.58277	-6.18245	-4.803	#NUM!	-5820.64	48.3957	-0.86756	-1.05868	2.05908	0.998193	21.2366	176.571	9.83549	23.386	-74.4144	0.142857
0.4	0.00021918	0.00241317	0.00956619		-8.42562	-6.02681	-4.64952	#NUM!	-5815.26	48.351	-0.922976	-1.14746	2.04537	0.998214	21.3663	177.65	9.76998	20.1714	-57.6387	0.163265
0.45	0.000252613	0.00277676	0.0109824		-8.28365	-5.88647	-4.51146	#NUM!	-5809.54	48.3034	-0.982306	-1.24014	2.03092	0.998235	21.4792	178.589	9.70099	17.6222	-46.4702	0.183673
0.5	0.000287721	0.00315718	0.0124568		-8.15352	-5.75808	-4.38549	#NUM!	-5803.45	48.2528	-1.04699	-1.34886	2.0157	0.998258	21.5783	179.413	9.62829	15.5244	-38.7619	0.204082
0.55	0.000324632	0.00355557	0.0139927		-8.03282	-5.63924	-4.26922	#NUM!	-5796.95	48.1987	-1.11719	-1.46147	1.99967	0.998282	21.6659	180.141	9.55172	13.746	-33.2469	0.22449
0.6	0.000363486	0.00397316	0.0155935		-7.91977	-5.52819	-4.1609	#NUM!	-5790.01	48.141	-1.19314	-1.57893	1.98273	0.998307	21.7436	180.787	9.47081	12.1997	-29.209	0.244898
0.65	0.000404439	0.00441131	0.017263		-7.81301	-5.42358	-4.05919	#NUM!	-5782.6	48.0794	-1.27508	-1.72407	1.96484	0.998333	21.8126	181.361	9.38534	10.8251	-26.3222	0.265306
0.7	0.000447664	0.00487149	0.0190052		-7.71147	-5.32436	-3.96304	#NUM!	-5774.67	48.0135	-1.36554	-1.89001	1.94596	0.99836	21.8738	181.87	9.29514	9.56746	-24.267	0.285714
0.75	0.000493354	0.00535528	0.0208242		-7.61428	-5.22967	-3.87164	#NUM!	-5766.18	47.9429	-1.46409	-2.05742	1.92603	0.998389	21.9277	182.318	9.19995	8.39838	-22.7554	0.306122
0.8	0.000541723	0.00586446	0.0227247		-7.52076	-5.13884	-3.7843	#NUM!	-5757.07	47.8671	-1.57129	-2.24241	1.905	0.998419	21.9748	182.71	9.09952	7.29192	-21.7339	0.326531
0.85	0.000593009	0.00640092	0.0247113		-7.4303	-5.05131	-3.70049	#NUM!	-5747.28	47.7857	-1.68833	-2.45448	1.88278	0.99845	22.0154	183.047	8.99337	6.225	-21.1495	0.346939
0.9	0.000647481	0.00696677	0.0267894		-7.34242	-4.9666	-3.61975	#NUM!	-5736.76	47.6983	-1.81673	-2.69671	1.85938	0.998483	22.0497	183.332	8.88162	5.17698	-20.9498	0.367347
0.95	0.000705441	0.0075643	0.0289642		-7.25669	-4.88432	-3.54169	#NUM!	-5725.43	47.6041	-1.958	-2.95917	1.83468	0.998517	22.0777	183.565	8.76362	4.13002	-21.0359	0.387755
1	0.000767229	0.00819605	0.0312417		-7.17273	-4.8041	-3.466	#NUM!	-5713.21	47.5025	-2.11265	-3.2514	1.80865	0.998552	22.0993	183.745	8.63926	3.07339	-21.4144	0.408163
1.05	0.00083323	0.00886478	0.033628		-7.0902	-4.72567	-3.3924	#NUM!	-5700.02	47.3928	-2.28314	-3.58272	1.78123	0.998589	22.1146	183.872	8.5083	1.98858	-22.1004	0.428571
1.1	0.000903882	0.00957355	0.0361297		-7.00881	-4.64875	-3.32064	#NUM!	-5685.75	47.2742	-2.47092	-3.95167	1.75238	0.998628	22.1233	183.944	8.37049	0.863343	-23.0603	0.44898
1.15	0.000979684	0.0103257	0.0387538		-6.92828	-4.57312	-3.25053	#NUM!	-5670.3	47.1457	-2.6783	-4.36246	1.7221	0.998668	22.125	183.958	8.22584	-0.317449	-24.3015	0.469388
1.2	0.00106121	0.011125	0.0415077		-6.84835	-4.49856	-3.18188	#NUM!	-5653.54	47.0063	-2.90717	-4.82343	1.69028	0.998709	22.1194	183.912	8.07386	-1.56681	-25.8485	0.489796
1.25	0.00114911	0.0119754	0.0443992		-6.76877	-4.4249	-3.11453	#NUM!	-5635.33	46.855	-3.16065	-5.35205	1.65706	0.998751	22.1062	183.802	7.9152	-2.9023	-27.764	0.510204
1.3	0.00124415	0.0128815	0.0474366		-6.6893	-4.35196	-3.04836	#NUM!	-5615.52	46.6903	-3.44237	-5.93576	1.62238	0.998794	22.0845	183.622	7.74953	-4.34321	-29.9846	0.530612
1.35	0.00134721	0.0138482	0.0506286		-6.60972	-4.2796	-2.98324	#NUM!	-5593.93	46.5107	-3.75422	-6.58746	1.58636	0.998838	22.0539	183.367	7.57746	-5.90076	-32.5638	0.55102
1.4	0.00145931	0.014881	0.0539845		-6.52979	-4.20767	-2.91906	#NUM!	-5570.37	46.3149	-4.10112	-7.33467	1.54907	0.998883	22.0136	183.032	7.39934	-7.59959	-35.6237	0.571429
1.45	0.00158166	0.015986	0.0575137		-6.44928	-4.13604	-2.85573	#NUM!	-5544.61	46.1006	-4.48769	-8.18486	1.5106	0.998927	21.9625	182.607	7.21559	-9.46313	-39.1938	0.591837
1.5	0.00171567	0.0171697	0.0612265		-6.36795	-4.06461	-2.79318	#NUM!	-5516.4	45.8661	-4.91961	-9.14372	1.47134	0.998972	21.8998	182.086	7.02805	-11.519	-43.2959	0.612245
1.55	0.00186304	0.0184395	0.0651333		-6.28555	-3.99326	-2.73132	#NUM!	-5485.44	45.6087	-5.40206	-10.213	1.43156	0.999016	21.824	181.455	6.83807	-13.7927	-47.935	0.632653
1.6	0.00202575	0.0198033	0.0692449		-6.20182	-3.92191	-2.67011	#NUM!	-5451.43	45.3259	-5.94091	-11.4325	1.39174	0.999058	21.7339	180.706	6.64783	-16.3125	-53.2901	0.653061
1.65	0.00220622	0.0212701	0.0735726		-6.11647	-3.85045	-2.60948	#NUM!	-5413.99	45.0146	-6.54531	-12.8094	1.35232	0.999098	21.6278	179.824	6.45956	-19.1217	-59.4004	0.673469
1.7	0.00240735	0.0228493	0.0781279		-6.02923	-3.77883	-2.54941	#NUM!	-5372.7	44.6713	-7.22184	-14.3422	1.31419	0.999135	21.5039	178.794	6.27742	-22.2525	-66.2531	0.693878
1.75	0.00263265	0.0245513	0.0829227		-5.93976	-3.70699	-2.48985	#NUM!	-5327.13	44.2924	-7.97953	-16.0741	1.27826	0.999168	21.3602	177.599	6.10581	-25.747	-74.0453	0.714286
1.8	0.00288643	0.0263875	0.087969		-5.84773	-3.63486	-2.43077	#NUM!	-5276.73	43.8734	-8.82925	-18.014	1.24564	0.999195	21.1942	176.219	5.94998	-29.657	-82.8242	0.734694
1.85	0.00317398	0.0283698	0.0932788		-5.75277	-3.56243	-2.37216	#NUM!	-5220.94	43.4095	-9.78094	-20.1401	1.21784	0.999214	21.0035	174.633	5.81719	-34.0295	-92.4837	0.755102
1.9	0.00350185	0.0305112	0.0988644		-5.65446	-3.48966	-2.31401	#NUM!	-5159.1	42.8953	-10.8433	-22.4431	1.19655	0.999222	20.7849	172.816	5.71548	-38.9054	-102.988	0.77551
1.95	0.00387814	0.0328252	0.104738		-5.5524	-3.41656	-2.25629	#NUM!	-5090.52	42.3252	-12.0252	-24.8981	1.18381	0.999218	20.5355	170.743	5.65462	-44.3282	-114.227	0.795918
2	0.00431296	0.035326	0.110911		-5.44613	-3.34314	-2.19903	#NUM!	-5014.47	41.6928	-13.3331	-27.3887	1.18187	0.999197	20.2518	168.384	5.6454	-50.3281	-125.663	0.816327
2.05	0.0048189	0.0380281	0.117395		-5.33521	-3.26943	-2.14221	#NUM!	-4930.16	40.9918	-14.7641	-29.7205	1.19335	0.999153	19.9302	165.71	5.70021	-56.8946	-136.405	0.836735
2.1	0.00541153	0.0409462	0.124201		-5.21922	-3.1955	-2.08585	#NUM!	-4836.9	40.2164	-16.3051	-31.6516	1.22088	0.999079	19.5675	162.694	5.83169	-63.9686	-145.353	0.857143
2.15	0.00611001	0.0440949	0.131341		-5.09783	-3.12141	-2.02996	#NUM!	-4734.06	39.3613	-17.9293	-32.7708	1.26714	0.998965	19.1609	159.313	6.05269	-71.4299	-150.633	0.877551
2.2	0.0069374	0.0474882	0.138823		-4.97083	-3.04727	-1.97456	#NUM!	-4621.26	38.4234	-19.5822	-32.4871	1.33417	0.998796	18.7084	155.551	6.37285	-79.0318	-149.525	0.897959
2.25	0.00792062	0.0511394	0.146658		-4.83829	-2.9732	-1.91965	#NUM!	-4498.54	37.4031	-21.178	-30.1913	1.42327	0.998554	18.2103	151.41	6.79847	-86.3824	-139.252	0.918367
2.3	0.00908955	0.0550606	0.154854		-4.70063	-2.89932	-1.86527	#NUM!	-4366.55	36.3056	-22.6013	-25.3452	1.53408	0.998218	17.6695	146.913	7.32777	-92.957	-117.35	0.938776
2.35	0.0104749	0.0592623	0.163418		-4.55877	-2.82578	-1.81144	#NUM!	-4226.71	35.143	-23.7125	-17.7157	1.66415	0.997763	17.0923	142.114	7.94904	-98.1174	-82.7413	0.959184
2.4	0.0121048	0.063753	0.172358		-4.41415	-2.75274	-1.75818	#NUM!	-4081.35	33.9344	-24.3729	-7.74539	1.80882	0.997167	16.4894	137.101	8.64007	-101.231	-37.4473	0.979592
2.45	0.0140001	0.0685393	0.181678		-4.26869	-2.68035	-1.70552	#NUM!	-3933.57	32.7057	-24.487	3.45137	1.96099	0.996418	15.8748	131.991	9.36694	-101.862	13.4592	1
2.5	0.0161713	0.0736255	0.191383		-4.12452	-2.60876	-1.65348	#NUM!	-3786.84	31.4857	-24.0278	14.3413	2.11269	0.995518	15.2643	126.915	10.0916	-99.8852	62.9799	1.02041
2.55	0.018616	0.0790136	0.201478		-3.98373	-2.53814	-1.60208	#NUM!	-3644.59	30.3029	-23.0529	23.4196	2.25605	0.994488	14.6735	122.003	10.7764	-95.5642	104.236	1.04082
2.6	0.0213212	0.0847036	0.211965		-3.84805	-2.4686	-1.55133	#NUM!	-3509.58	29.1804	-21.6858	29.8178	2.38473	0.993366	14.1149	117.359	11.391	-89.4617	133.272	1.06122
2.65	0.0242659	0.0906934	0.222846		-3.71868	-2.40027	-1.50127	#NUM!	-3383.77	28.1343	-20.0711	33.354	2.49463	0.992199	13.5975	113.056	11.916	-82.237	149.259	1.08163
2.7	0.0274257	0.0969793	0.234123		-3.59627	-2.33326	-1.45191	#NUM!	-3268.18	27.1733	-18.3504	34.4001	2.58403	0.991038	13.1258	109.135	12.343	-74.5357	153.9	1.10204
2.75	0.0307764	0.103556	0.245795		-3.48101	-2.26764	-1.40326	#NUM!	-3163.06	26.2993	-16.6311	33.6564	2.6531	0.989926	12.701	105.603	12.6729	-66.847	150.398	1.12245
2.8	0.0342955	0.110418	0.257863		-3.37274	-2.20348	-1.35533	#NUM!	-3068.15	25.5102	-14.9848	31.756	2.70324	0.988896	12.3219	102.45	12.9124	-59.496	141.641	1.14286
2.85	0.0379638	0.117557	0.270327		-3.27112	-2.14083	-1.30812	#NUM!	-2982.84	24.8008	-13.4555	29.2272	2.73687	0.987969	11.9855	99.6532	13.073	-52.6829	130.041	1.16327
2.9	0.0417654	0.124968	0.283184		-3.17569	-2.0797	-1.26166	#NUM!	-2906.32	24.1646	-12.0621	26.4829	2.7561	0.987158	11.6882	97.1819	13.1649	-46.4918	117.482	1.18367
2.95	0.0456873	0.132642	0.296433		-3.08593	-2.0201	-1.21593	#NUM!	-2837.77	23.5946	-10.8072	23.7479	2.76361	0.986466	11.4263	95.004	13.2008	-40.9347	104.993	1.20408
3	0.0497191	0.140571	0.310074		-3.00137	-1.96204	-1.17094	#NUM!	-2776.34	23.0839	-9.68727	21.1449	2.76177	0.985888	11.1959	93.0884	13.192	-35.9926	93.1309	1.22449
3.05	0.0538529	0.14875	0.324103		-2.9215	-1.90549	-1.12669	#NUM!	-2721.25	22.6259	-8.69275	18.7585	2.75233	0.985418	10.9934	91.4048	13.1469	-31.6216	82.2722	1.2449
3.1	0.0580823	0.157171	0.33852		-2.84589	-1.85042	-1.08317	#NUM!	-2671.79	22.2146	-7.81142	16.6115	2.73719	0.985045	10.8156	89.9262	13.0746	-27.7653	72.5222	1.26531
3.15	0.0624024	0.165828	0.353322		-2.77415	-1.7968	-1.04038	#NUM!	-2627.31	21.8447	-7.0316	14.6949	2.71775	0.984758	10.6595	88.6282	12.9817	-24.3694	63.8366	1.28571
3.2	0.0668095	0.174716	0.368508		-2.70591	-1.74459	-0.998293	#NUM!	-2587.22	21.5115	-6.34193	13.0045	2.69517	0.984545	10.5225	87.4893	12.8739	-21.3817	56.1945	1.30612
3.25	0.0713008	0.183829	0.384075		-2.64085	-1.69375	-0.956917	#NUM!	-2551.03	21.2105	-5.73115	11.5205	2.67045	0.984396	10.4023	86.4901	12.7558	-18.7499	49.5042	1.32653
3.3	0.0758743	0.193164	0.400024		-2.57868	-1.64422	-0.916231	#NUM!	-2518.29	20.9383	-5.18988	10.2152	2.64432	0.984301	10.297	85.6143	12.631	-16.4312	43.6316	1.34694
3.35	0.0805285	0.202716	0.416351		-2.51914	-1.59595	-0.876227	#NUM!	-2488.61	20.6915	-4.70963	9.07623	2.61741	0.984251	10.2047	84.8469	12.5024	-14.3868	38.524	1.36735
3.4	0.0852625	0.212482	0.433058		-2.46202	-1.5489	-0.836884	#NUM!	-2461.65	20.4674	-4.28226	8.07602	2.59024	0.984236	10.124	84.1756	12.3727	-12.5788	34.0525	1.38776
3.45	0.0900756	0.22246	0.450142		-2.40711	-1.50301	-0.798192	#NUM!	-2437.11	20.2633	-3.90202	7.1992	2.56308	0.984253	10.0534	83.5891	12.2429	-10.9815	30.1451	1.40816
3.5	0.0949678	0.232647	0.467604		-2.35422	-1.45823	-0.760133	#NUM!	-2414.72	20.0772	-3.56234	6.42742	2.5363	0.984292	9.99188	83.0775	12.115	-9.56433	26.7187	1.42857
3.55	0.099939	0.243042	0.485445		-2.3032	-1.41452	-0.722689	#NUM!	-2394.26	19.9071	-3.25928	5.75467	2.51009	0.98435	9.93838	82.6326	11.9898	-8.30966	23.7412	1.44898
3.6	0.10499	0.253644	0.503663		-2.25389	-1.37182	-0.685848	#NUM!	-2375.52	19.7513	-2.98687	5.17403	2.48456	0.984423	9.89194	82.2465	11.8678	-7.19022	21.1854	1.46939
3.65	0.11012	0.264452	0.522261		-2.20618	-1.3301	-0.649588	#NUM!	-2358.34	19.6084	-2.74188	4.64661	2.45981	0.984507	9.8519	81.9136	11.7496	-6.19112	18.8718	1.4898
3.7	0.115331	0.275466	0.54124		-2.15995	-1.28929	-0.613892	#NUM!	-2342.54	19.4771	-2.52221	4.1749	2.43597	0.984599	9.81747	81.6274	11.6358	-5.30304	16.8081	1.5102
3.75	0.120623	0.286687	0.560601		-2.11509	-1.24936	-0.578746	#NUM!	-2328	19.3562	-2.32439	3.76377	2.41299	0.984697	9.78812	81.3833	11.526	-4.51031	15.0174	1.53061
3.8	0.125998	0.298114	0.580347		-2.07149	-1.21028	-0.544129	#NUM!	-2314.59	19.2446	-2.14583	3.40771	2.39102	0.984798	9.76323	81.1764	11.421	-3.8013	13.4788	1.55102
3.85	0.131456	0.309749	0.600479		-2.02908	-1.17199	-0.510028	#NUM!	-2302.19	19.1416	-1.98362	3.07731	2.36995	0.984902	9.7424	81.0032	11.3204	-3.16243	12.0546	1.57143
3.9	0.136999	0.321594	0.621002		-1.98778	-1.13447	-0.476421	#NUM!	-2290.73	19.0463	-1.8381	2.79092	2.3498	0.985007	9.72519	80.8601	11.2242	-2.59584	10.8249	1.59184
3.95	0.142629	0.333649	0.641917		-1.94751	-1.09767	-0.443296	#NUM!	-2280.09	18.9578	-1.70452	2.55418	2.33062	0.985111	9.71118	80.7436	11.1325	-2.07994	9.82202	1.61224
4	0.148345	0.345917	0.663229		-1.90821	-1.06156	-0.410635	#NUM!	-2270.23	18.8758	-1.58268	2.3213	2.31228	0.985216	9.70018	80.6521	11.0449	-1.61364	8.83584	1.63265
4.05	0.154151	0.3584	0.684942		-1.86982	-1.02611	-0.378421	#NUM!	-2261.05	18.7995	-1.47239	2.11226	2.29483	0.985318	9.69177	80.5822	10.9616	-1.19636	7.95333	1.65306
4.1	0.160047	0.371101	0.707061		-1.83229	-0.991281	-0.346638	#NUM!	-2252.52	18.7286	-1.37146	1.92555	2.27818	0.985419	9.68579	80.5325	10.8821	-0.818302	7.16799	1.67347
4.15	0.166036	0.384022	0.72959		-1.79555	-0.957055	-0.315273	#NUM!	-2244.56	18.6624	-1.27984	1.7627	2.26236	0.985517	9.68193	80.5004	10.8065	-0.479559	6.4909	1.69388
4.2	0.172119	0.397166	0.752534		-1.75957	-0.923401	-0.284309	#NUM!	-2237.13	18.6006	-1.19519	1.62295	2.2473	0.985613	9.68002	80.4845	10.7345	-0.169212	5.91933	1.71429
4.25	0.178298	0.410537	0.7759		-1.7243	-0.890289	-0.253732	#NUM!	-2230.18	18.5429	-1.11754	1.48082	2.23296	0.985706	9.67989	80.4835	10.6661	0.112374	5.33153	1.73469
4.3	0.184575	0.424139	0.799693		-1.6897	-0.857694	-0.223527	#NUM!	-2223.69	18.4888	-1.04711	1.35452	2.21929	0.985797	9.68137	80.4958	10.6007	0.363941	4.81303	1.7551
4.35	0.190953	0.437974	0.82392		-1.65573	-0.825596	-0.193682	#NUM!	-2217.59	18.4381	-0.982093	1.26013	2.20633	0.985883	9.68427	80.5199	10.5388	0.593677	4.44045	1.77551
4.4	0.197433	0.452048	0.848588		-1.62236	-0.793967	-0.164181	#NUM!	-2211.87	18.3906	-0.921093	1.16793	2.19396	0.985968	9.68851	80.5551	10.4798	0.807986	4.07394	1.79592
4.45	0.204017	0.466364	0.873705		-1.58955	-0.762789	-0.135012	#NUM!	-2206.51	18.346	-0.8653	1.07009	2.18219	0.986049	9.69399	80.6007	10.4236	1.00107	3.67788	1.81633
4.5	0.210708	0.480927	0.899277		-1.55728	-0.73204	-0.106164	#NUM!	-2201.47	18.3041	-0.814083	0.982558	2.17098	0.986128	9.70055	80.6552	10.37	1.17577	3.33014	1.83673
4.55	0.217508	0.495741	0.925313		-1.52552	-0.701702	-0.0776232	#NUM!	-2196.72	18.2646	-0.767044	0.911638	2.16032	0.986203	9.70813	80.7182	10.3191	1.33408	3.05653	1.85714
4.6	0.224421	0.510813	0.951823		-1.49423	-0.671752	-0.0493762	#NUM!	-2192.24	18.2274	-0.722919	0.854773	2.15016	0.986276	9.7166	80.7886	10.2705	1.48143	2.84388	1.87755
4.65	0.231447	0.526146	0.978814		-1.4634	-0.642177	-0.0214136	#NUM!	-2188.03	18.1923	-0.681567	0.782173	2.14046	0.986346	9.72595	80.8664	10.2242	1.61847	2.55543	1.89796
4.7	0.238591	0.541747	1.0063		-1.433	-0.612956	0.00628024	#NUM!	-2184.04	18.1592	-0.644702	0.715108	2.13126	0.986413	9.73606	80.9505	10.1803	1.73697	2.28757	1.91837
4.75	0.245855	0.557621	1.03428		-1.40301	-0.584076	0.0337055	#NUM!	-2180.27	18.1279	-0.610056	0.678056	2.12243	0.986477	9.74684	81.0401	10.1381	1.84723	2.16482	1.93878
4.8	0.253241	0.573775	1.06277		-1.37341	-0.555518	0.0608787	#NUM!	-2176.71	18.0982	-0.576896	0.638449	2.11395	0.98654	9.75828	81.1352	10.0976	1.95345	2.02969	1.95918
4.85	0.260754	0.590214	1.09179		-1.34418	-0.52727	0.0878186	#NUM!	-2173.33	18.0702	-0.546211	0.596999	2.10596	0.9866	9.77033	81.2354	10.0594	2.0502	1.87648	1.97959
4.9	0.268395	0.606945	1.12134		-1.3153	-0.499317	0.114524	#NUM!	-2170.14	18.0436	-0.517197	0.559472	2.09828	0.986657	9.78294	81.3402	10.0227	2.1411	1.74397	2
4.95	0.276168	0.623975	1.15144		-1.28675	-0.471645	0.141013	#NUM!	-2167.11	18.0185	-0.490264	41.5729	2.09098	0.986712	9.79608	81.4495	9.98785	2.22459	143.134	2.02041
5	0.284077	0.641311	1.1821		-1.25851	-0.444241	0.167293	#NUM!	-2164.24	17.9946	3.64009	-0.0990432	2.08402	0.986765	9.80969	81.5627	9.95462	16.4545	0.449413	2.04082

## Sheet: Qst_CoBTTriP
	Units = K		1/T1	1/T2	1/T3	1/T4
T1	195		0.00512821	0.00469484	0.0044843								n min	0.05				-∆H	35.5
T2	213												Interval	0.05				-∆S	108.3
T3	223																	-∆S corrected	109.5
T4																		Accesible sites	2.1	mmol/g
																		Low-loading	1.6	mmol/g
n (mmol/g)	P (T1)	P (T2)	P (T3)	P (T4)	lnP (T1)	lnP (T2)	lnP (T3)	lnp (T4)	dlnP/dT	∆H	1st derivative	2nd derivative	Qst std error	R2	Y-int	∆S	∆S std erro	1st derivative	2nd derivative	Surface coverage
0.05	2.00134e-07	2.21747e-06	7.16897e-06		-15.4243	-13.0191	-11.8457	#NUM!	-5556.43	46.1989			0.0480684	0.999999	13.0695	108.667	0.229605			0.0238095
0.1	5.20921e-07	5.68152e-06	1.81759e-05		-14.4677	-12.0783	-10.9154	#NUM!	-5516.28	45.8652	-10.3026		0.0204555	1	13.8207	114.912	0.0977084	89.0766		0.047619
0.15	1.10189e-06	1.16169e-05	3.64058e-05		-13.7185	-11.363	-10.2208	#NUM!	-5432.52	45.1687	-22.3338	-324.933	0.0193191	1	14.1409	117.574	0.0922805	10.5663	-1780.3	0.0714286
0.2	2.34334e-06	2.28282e-05	6.87152e-05		-12.9639	-10.6875	-9.58554	#NUM!	-5247.67	43.6318	-42.7959	-303.544	0.0377316	0.999999	13.9478	115.969	0.18023	-88.9533	-1521.69	0.0952381
0.25	5.30102e-06	4.45012e-05	0.000125891		-12.1476	-10.02	-8.98009	#NUM!	-4917.81	40.8891	-52.6882	44.9058	0.0608396	0.999998	13.071	108.679	0.290609	-141.603	-10.9958	0.119048
0.3	1.10342e-05	8.07542e-05	0.000215795		-11.4145	-9.4241	-8.44118	#NUM!	-4613.98	38.3629	-38.3053	335.379	0.154188	0.999984	12.2447	101.808	0.736502	-90.0529	1234.58	0.142857
0.35	1.90804e-05	0.00013052	0.000337262		-10.8668	-8.94398	-7.99465	#NUM!	-4457.1	37.0586	-19.1503	289.519	0.146742	0.999984	11.9879	99.6737	0.700932	-18.1446	1045.49	0.166667
0.4	2.88874e-05	0.000191729	0.000486816		-10.4521	-8.55943	-7.62762	#NUM!	-4383.66	36.4479	-9.35344	138.512	0.119092	0.999989	12.0264	99.9939	0.56886	14.4961	428.46	0.190476
0.45	4.04141e-05	0.00026408	0.000663925		-10.1163	-8.23926	-7.31734	#NUM!	-4344.6	36.1232	-5.29907	57.6018	0.0968415	0.999993	12.1623	101.123	0.462577	24.7014	123.863	0.214286
0.5	5.38803e-05	0.000348665	0.000870973		-9.82875	-7.9614	-7.0459	#NUM!	-4319.92	35.918	-3.59326	24.0602	0.0805092	0.999995	12.3235	102.464	0.384564	26.8823	15.6139	0.238095
0.55	6.96649e-05	0.00044754	0.00111255		-9.57181	-7.71174	-6.8011	#NUM!	-4301.39	35.7639	-2.89306	9.03119	0.0677709	0.999996	12.4856	103.811	0.323717	26.2628	-23.006	0.261905
0.6	8.82986e-05	0.000563627	0.00139521		-9.33479	-7.48112	-6.57471	#NUM!	-4285.13	35.6287	-2.69014	1.08665	0.0568958	0.999997	12.6394	105.09	0.271771	24.5817	-38.7409	0.285714
0.65	0.000110494	0.00070082	0.00172765		-9.11055	-7.26326	-6.36099	#NUM!	-4269.03	35.4949	-2.78439	-4.03976	0.0468355	0.999998	12.7812	106.27	0.223717	22.3887	-47.6315	0.309524
0.7	0.0001372	0.000864181	0.002121		-8.89407	-7.05373	-6.15587	#NUM!	-4251.64	35.3503	-3.09411	-7.95719	0.0368905	0.999999	12.9087	107.329	0.176213	19.8186	-55.0475	0.333333
0.75	0.000169672	0.00106021	0.00258932		-8.68164	-6.84929	-5.95636	#NUM!	-4231.82	35.1855	-3.58011	-11.2769	0.0267374	0.999999	13.0196	108.252	0.127715	16.8839	-62.7266	0.357143
0.8	0.000209561	0.00129716	0.00315004		-8.4705	-6.64758	-5.76034	#NUM!	-4208.58	34.9923	-4.2218	-14.0482	0.0160675	1	13.1117	109.018	0.0767487	13.5459	-70.4186	0.380952
0.85	0.000259008	0.00158526	0.00382422		-8.25865	-6.44701	-5.5664	#NUM!	-4181.04	34.7633	-4.98493	-15.7775	0.00491771	1	13.1825	109.606	0.0234902	9.84207	-75.6677	0.404762
0.9	0.000320704	0.00193679	0.00463653		-8.04499	-6.24672	-5.37379	#NUM!	-4148.63	34.4938	-5.79955	-15.7604	0.00640855	1	13.2301	110.002	0.0306113	5.97913	-75.1605	0.428571
0.95	0.000397876	0.0023659	0.00561459		-7.82937	-6.0466	-5.18239	#NUM!	-4111.29	34.1833	-6.56097	-13.4351	0.0179557	1	13.2544	110.204	0.0857682	2.32602	-66.1457	0.452381
1	0.00049414	0.00288788	0.00678758		-7.61269	-5.84723	-4.99266	#NUM!	-4069.72	33.8377	-7.14306	-8.7997	0.029796	0.999999	13.2581	110.234	0.142325	-0.635433	-48.1314	0.47619
1.05	0.000613211	0.00351819	0.00818449		-7.3968	-5.64981	-4.80551	#NUM!	-4025.38	33.469	-7.44094	-2.82671	0.0424054	0.999998	13.2468	110.14	0.202555	-2.48712	-24.7876	0.5
1.1	0.000758585	0.00427151	0.00983247		-7.18406	-5.45579	-4.62207	#NUM!	-3980.22	33.0936	-7.42573	2.84439	0.0566376	0.999997	13.2282	109.986	0.270538	-3.1142	-2.70721	0.52381
1.15	0.000933375	0.00516119	0.0117559		-6.9767	-5.26659	-4.4434	#NUM!	-3936.07	32.7265	-7.15651	6.76206	0.0731996	0.999995	13.2093	109.829	0.349648	-2.75784	12.2488	0.547619
1.2	0.00114043	0.00619966	0.0139771		-6.77635	-5.08326	-4.27034	#NUM!	-3894.15	32.3779	-6.74952	8.23116	0.0924113	0.999992	13.195	109.71	0.441416	-1.88932	17.3049	0.571429
1.25	0.00138268	0.0073994	0.0165175		-6.58373	-4.90636	-4.10333	#NUM!	-3854.89	32.0515	-6.33339	7.45448	0.114322	0.999987	13.1866	109.64	0.546076	-1.02735	13.4188	0.595238
1.3	0.00166363	0.00877431	0.0193996		-6.39875	-4.73593	-3.9425	#NUM!	-3817.98	31.7446	-6.00408	5.16417	0.138729	0.999981	13.1827	109.607	0.66266	-0.547433	3.71287	0.619048
1.35	0.00198777	0.010341	0.0226492		-6.22074	-4.57164	-3.78763	#NUM!	-3782.68	31.4511	-5.81697	2.01241	0.165264	0.999972	13.18	109.585	0.789407	-0.656067	-9.17371	0.642857
1.4	0.002361	0.01212	0.0262965		-6.04867	-4.4129	-3.63832	#NUM!	-3748.02	31.1629	-5.80284	-1.59981	0.193757	0.999961	13.1748	109.542	0.925509	-1.4648	-23.7407	0.666667
1.45	0.00279112	0.0141369	0.0303776		-5.88131	-4.25897	-3.49405	#NUM!	-3712.89	30.8708	-5.97695	-5.44547	0.224051	0.999947	13.1624	109.439	1.07021	-3.03013	-39.2139	0.690476
1.5	0.00328834	0.0164228	0.034935		-5.71737	-4.10908	-3.35427	#NUM!	-3676.13	30.5652	-6.34738	-9.48073	0.2556	0.99993	13.1383	109.239	1.22091	-5.3862	-55.5684	0.714286
1.55	0.00386598	0.0190162	0.0400179		-5.55554	-3.96246	-3.21843	#NUM!	-3636.55	30.2361	-6.92503	-13.7933	0.288343	0.999909	13.0976	108.9	1.37731	-8.58697	-73.331	0.738095
1.6	0.00454153	0.0219631	0.0456828		-5.39449	-3.81839	-3.08603	#NUM!	-3592.84	29.8727	-7.72671	-18.4892	0.321447	0.999884	13.035	108.38	1.53544	-12.7193	-93.0714	0.761905
1.65	0.00533799	0.0253184	0.0519931		-5.23291	-3.67622	-2.95664	#NUM!	-3543.62	29.4634	-8.77395	-23.6585	0.35373	0.999856	12.9447	107.628	1.68964	-17.8941	-115.257	0.785714
1.7	0.00628584	0.0291469	0.0590184		-5.06946	-3.53541	-2.82991	#NUM!	-3487.32	28.9953	-10.0926	-29.3252	0.383488	0.999825	12.8198	106.59	1.83179	-24.245	-140.042	0.809524
1.75	0.00742568	0.0335234	0.0668336		-4.90281	-3.39551	-2.70555	#NUM!	-3422.23	28.4541	-11.7065	-35.3584	0.408033	0.999794	12.6531	105.204	1.94903	-31.8983	-166.864	0.833333
1.8	0.00881182	0.0385329	0.0755174		-4.73166	-3.25624	-2.58339	#NUM!	-3346.52	27.8246	-13.6284	43.7303	0.423702	0.999768	12.4362	103.401	2.02387	-40.9314	89.9953	0.857143
1.85	0.0105167	0.0442692	0.0851494		-4.55479	-3.11747	-2.46335	#NUM!	-3258.32	27.0913	-7.33344	-46.3921	0.425889	0.999753	12.1608	101.111	2.03432	-22.8988	-216.995	0.880952
1.9	0.0105167	0.0442692	0.0851494		-4.55479	-3.11747	-2.46335	#NUM!	-3258.32	27.0913	-18.2676	-219.152	0.425889	0.999753	12.1608	101.111	2.03432	-62.6309	-797.12	0.904762
1.95	0.0152905	0.058321	0.107564		-4.18052	-2.84179	-2.22967	#NUM!	-3038.61	25.2645	-29.2486	72.866	0.368929	0.999787	11.4075	94.8476	1.76224	-102.611	226.509	0.928571
2	0.0186277	0.0668312	0.120482		-3.98311	-2.70559	-2.11625	#NUM!	-2906.54	24.1664	-10.981	210.471	0.301934	0.999844	10.9266	90.8496	1.44223	-39.98	742.09	0.952381
2.05	0.0186277	0.0668312	0.120482		-3.98311	-2.70559	-2.11625	#NUM!	-2906.54	24.1664	-8.2015	-35.9035	0.301934	0.999844	10.9266	90.8496	1.44223	-28.4019	-93.5267	0.97619
2.1	0.0219649	0.0753414	0.1334		-3.81831	-2.58573	-2.0144	#NUM!	-2807.9	23.3463	-14.5714	18.3165	0.265052	0.999871	10.5851	88.0094	1.26606	-49.3327	74.7106	1
2.15	0.0253021	0.0838516	0.146318		-3.67687	-2.47871	-1.92197	#NUM!	-2731.29	22.7093	-6.36986	94.7578	0.244458	0.999884	10.3333	85.9164	1.16769	-20.9308	334.888	1.02381
2.2	0.0253021	0.0838516	0.146318		-3.67687	-2.47871	-1.92197	#NUM!	-2731.29	22.7093	-5.09559	-28.9751	0.244458	0.999884	10.3333	85.9164	1.16769	-15.8439	-71.4936	1.04762
2.25	0.0286393	0.0923618	0.159236		-3.55298	-2.38204	-1.83737	#NUM!	-2670	22.1997	-9.26736	9.23806	0.233194	0.99989	10.1428	84.332	1.11388	-28.0802	36.0754	1.07143
2.3	0.0319765	0.100872	0.172154		-3.44275	-2.2939	-1.75937	#NUM!	-2619.83	21.7826	-4.17178	57.8743	0.227493	0.999891	9.99559	83.1083	1.08665	-12.2363	184.854	1.09524
2.35	0.0319765	0.100872	0.172154		-3.44275	-2.2939	-1.75937	#NUM!	-2619.83	21.7826	-3.47993	-22.5612	0.227493	0.999891	9.99559	83.1083	1.08665	-9.5948	-49.6854	1.11905
2.4	0.0353137	0.109382	0.185072		-3.34348	-2.21291	-1.68701	#NUM!	-2577.98	21.4346	-6.4279	5.31963	0.225204	0.99989	9.88019	82.1489	1.07572	-17.2049	19.8474	1.14286
2.45	0.0386509	0.117892	0.19799		-3.25319	-2.13798	-1.61954	#NUM!	-2542.52	21.1398	-2.94797	38.9798	0.225044	0.999887	9.78867	81.3879	1.07496	-7.61006	111.181	1.16667
2.5	0.0386509	0.117892	0.19799		-3.25319	-2.13798	-1.61954	#NUM!	-2542.52	21.1398	-2.52992	-17.7723	0.225044	0.999887	9.78867	81.3879	1.07496	-6.08674	-33.7324	1.19048
2.55	0.0419881	0.126403	0.210908		-3.17037	-2.06828	-1.55633	#NUM!	-2512.09	20.8868	-4.7252	3.34631	0.226224	0.999883	9.71546	80.7792	1.08059	-10.9833	11.9018	1.21429
2.6	0.0453253	0.134913	0.223826		-3.09389	-2.00313	-1.49689	#NUM!	-2485.69	20.6673	-2.19528	28.0202	0.228242	0.999878	9.65657	80.2895	1.09023	-4.89656	70.3081	1.2381
2.65	0.0453253	0.134913	0.223826		-3.09389	-2.00313	-1.49689	#NUM!	-2485.69	20.6673	-1.92318	-14.2678	0.228242	0.999878	9.65657	80.2895	1.09023	-3.95249	-22.4978	1.2619
2.7	0.0486625	0.143423	0.236744		-3.02285	-1.94196	-1.44078	#NUM!	-2462.56	20.4749	-3.62207	2.24293	0.230776	0.999873	9.60903	79.8943	1.10234	-7.14634	7.58635	1.28571
2.75	0.0519997	0.151933	0.249662		-2.95652	-1.88431	-1.38765	#NUM!	-2442.13	20.3051	-1.69889	21.1028	0.233614	0.999868	9.57062	79.5749	1.11589	-3.19385	45.69	1.30952
2.8	0.0519997	0.151933	0.249662		-2.95652	-1.88431	-1.38765	#NUM!	-2442.13	20.3051	-1.51179	-11.6698	0.233614	0.999868	9.57062	79.5749	1.11589	-2.57734	-14.5489	1.33333
2.85	0.0553369	0.160443	0.26258		-2.89432	-1.82981	-1.3372	#NUM!	-2423.94	20.1539	-2.86587	1.57717	0.236615	0.999862	9.53962	79.3172	1.13023	-4.64874	5.05945	1.35714
2.9	0.0586741	0.168954	0.275498		-2.83576	-1.77813	-1.28917	#NUM!	-2407.66	20.0185	-1.35407	16.4599	0.239686	0.999857	9.51471	79.11	1.14489	-2.0714	29.9614	1.38095
2.95	0.0586741	0.168954	0.275498		-2.83576	-1.77813	-1.28917	#NUM!	-2407.66	20.0185	-1.21988	-9.70535	0.239686	0.999857	9.51471	79.11	1.14489	-1.65261	-8.84524	1.40476
3	0.0620113	0.177464	0.288416		-2.78044	-1.72899	-1.24335	#NUM!	-2392.99	19.8965	-2.32461	1.15144	0.242763	0.999851	9.49483	78.9448	1.15959	-2.95592	3.49288	1.42857
3.05	0.0653485	0.185974	0.301334		-2.72802	-1.68215	-1.19954	#NUM!	-2379.7	19.786	-1.10473	13.1942	0.245805	0.999846	9.47915	78.8144	1.17412	-1.30332	19.4588	1.45238
3.1	0.0653485	0.185974	0.301334		-2.72802	-1.68215	-1.19954	#NUM!	-2379.7	19.786	-1.00519	-8.19008	0.245805	0.999846	9.47915	78.8144	1.17412	-1.01004	-4.69053	1.47619
3.15	0.0686857	0.194484	0.314252		-2.67821	-1.6374	-1.15756	#NUM!	-2367.61	19.6855	-1.92374	0.866419	0.248784	0.99984	9.46701	78.7134	1.18835	-1.77237	2.47712	1.5
3.2	0.0720229	0.202994	0.32717		-2.63077	-1.59458	-1.11728	#NUM!	-2356.56	19.5936	-0.918549	10.8107	0.251684	0.999835	9.45784	78.6372	1.2022	-0.762329	12.2037	1.52381
3.25	0.0720229	0.202994	0.32717		-2.63077	-1.59458	-1.11728	#NUM!	-2356.56	19.5936	-0.842667	-6.99947	0.251684	0.999835	9.45784	78.6372	1.2022	-0.551998	-1.62239	1.54762
3.3	0.0753601	0.211505	0.340088		-2.58548	-1.55351	-1.07855	#NUM!	-2346.43	19.5094	-1.6185	0.66837	0.254493	0.99983	9.4512	78.582	1.21562	-0.924567	1.79428	1.57143
3.35	0.0786973	0.220015	0.353006		-2.54215	-1.51406	-1.04127	#NUM!	-2337.1	19.4318	-0.77583	9.01843	0.257206	0.999825	9.44672	78.5447	1.22858	-0.37257	7.05697	1.59524
3.4	0.0786973	0.220015	0.353006		-2.54215	-1.51406	-1.04127	#NUM!	-2337.1	19.4318	-0.716654	-6.04833	0.257206	0.999825	9.44672	78.5447	1.22858	-0.21887	0.669713	1.61905
3.45	0.0820345	0.228525	0.365924		-2.50062	-1.47611	-1.00533	#NUM!	-2328.48	19.3601	-1.38066	0.526448	0.259821	0.99982	9.44409	78.5228	1.24107	-0.305599	1.32142	1.64286
3.5	0.0853717	0.237035	0.378842		-2.46074	-1.43955	-0.970636	#NUM!	-2320.49	19.2937	-0.664009	7.63695	0.262336	0.999815	9.44304	78.5142	1.25308	-0.0867281	3.32845	1.66667
3.55	0.0853717	0.237035	0.378842		-2.46074	-1.43955	-0.970636	#NUM!	-2320.49	19.2937	-0.616967	-5.27718	0.262336	0.999815	9.44304	78.5142	1.25308	0.027246	2.39799	1.69048
3.6	0.0887089	0.245545	0.39176		-2.4224	-1.40427	-0.937106	#NUM!	-2313.07	19.232	-1.19173	0.422075	0.264753	0.999811	9.44337	78.5169	1.26463	0.153071	0.985791	1.71429
3.65	0.0920461	0.254056	0.404678		-2.38547	-1.3702	-0.904664	#NUM!	-2306.16	19.1745	-0.574759	6.54982	0.267074	0.999806	9.44488	78.5295	1.27572	0.125825	0.582234	1.7381
3.7	0.0920461	0.254056	0.404678		-2.38547	-1.3702	-0.904664	#NUM!	-2306.16	19.1745	-0.536745	-4.64371	0.267074	0.999806	9.44488	78.5295	1.27572	0.211294	3.71018	1.7619
3.75	0.0953833	0.262566	0.417596		-2.34985	-1.33725	-0.873241	#NUM!	-2299.7	19.1209	-1.03913	0.343597	0.269303	0.999802	9.44742	78.5506	1.28636	0.496843	0.742542	1.78571
3.8	0.0987205	0.271076	0.430514		-2.31546	-1.30536	-0.842775	#NUM!	-2293.66	19.0706	-0.502385	5.67904	0.271442	0.999797	9.45086	78.5792	1.29658	0.285549	-1.46675	1.80952
3.85	0.0987205	0.271076	0.430514		-2.31546	-1.30536	-0.842775	#NUM!	-2293.66	19.0706	-0.471226	-4.11722	0.271442	0.999797	9.45086	78.5792	1.29658	0.350168	4.71097	1.83333
3.9	0.102058	0.279586	0.443432		-2.28222	-1.27444	-0.813211	#NUM!	-2287.99	19.0235	-0.914107	53.4905	0.273496	0.999793	9.45507	78.6142	1.30639	0.756645	198.073	1.85714
3.95	0.105395	0.288096	0.45635		-2.25004	-1.24446	-0.784495	#NUM!	-2282.66	18.9792	4.87782	-0.234386	0.275468	0.999789	9.45996	78.6548	1.31581	20.1575	0.194012	1.88095
	0.105395	0.288096	0.45635
	0.108732	0.296607	0.469268
	0.112069	0.305117	0.482186
	0.112069	0.305117	0.482186
	0.115406	0.313627	0.495104
	0.118744	0.322137	0.508022
	0.118744	0.322137	0.508022
	0.122081	0.330647	0.52094
	0.125418	0.339158	0.533858
	0.125418	0.339158	0.533858
	0.128755	0.347668	0.546776
	0.132093	0.356178	0.559694
	0.132093	0.356178	0.559694
	0.13543	0.364688	0.572612
	0.138767	0.373198	0.58553
	0.138767	0.373198	0.58553
	0.142104	0.381709	0.598448
	0.145441	0.390219	0.611366
	0.145441	0.390219	0.611366
	0.148779	0.398729	0.624284
	0.152116	0.407239	0.637202

## Sheet: Qst_CoBTTri
	Units = K		1/T1	1/T2	1/T3	1/T4
T1	195		0.00512821	0.00469484	0.0044843								n min	0.05				-∆H	33.1
T2	213												Interval	0.05				-∆S	117.5
T3	223																	-∆S corrected	123.1
T4																		Accesible sites	2.8	mmol/g
																		Low-loading	1.8	mmol/g
n (mmol/g)	P (T1)	P (T2)	P (T3)	P (T4)	lnP (T1)	lnP (T2)	lnP (T3)	lnp (T4)	dlnP/dT	∆H	1st derivative	2nd derivative	Qst std error	R2	Y-int	∆S	∆S std erro	1st derivative	2nd derivative	Surface coverage
0.05	8.37118e-05	0.000491016	0.0011508		-9.38813	-7.61903	-6.7673	#NUM!	-4072.03	33.8569			0.0742155	0.999995	11.4952	95.5765	0.354501			0.0178571
0.1	0.000170516	0.000999535	0.00234066		-8.67668	-6.90822	-6.05732	#NUM!	-4069.86	33.8389	-0.368135		0.0793207	0.999995	12.1956	101.4	0.378887	92.54		0.0357143
0.15	0.000260585	0.00152649	0.00357153		-8.25258	-6.48478	-5.63476	#NUM!	-4067.6	33.8201	-0.387145	-0.407772	0.0846517	0.999994	12.6082	104.831	0.404351	5477.11	3.56075e+06	0.0535714
0.2	0.000354107	0.00207287	0.00484543		-7.94591	-6.17882	-5.32972	#NUM!	-4065.21	33.8002	-0.408912	-0.441611	0.0902276	0.999993	12.9026	107.279	0.430985	3914.41	-2.21712e+06	0.0714286
0.25	0.000451283	0.00263974	0.00616456		-7.70342	-5.93707	-5.08894	#NUM!	-4062.68	33.7792	-0.431306	-0.462384	0.0960328	0.999992	13.1323	109.188	0.458714	3008.9	-1.29827e+06	0.0892857
0.3	0.00055233	0.00322826	0.00753122		-7.50136	-5.73581	-4.8887	#NUM!	-4060.02	33.757	-0.45515	-0.496208	0.102206	0.999991	13.3207	110.755	0.4882	2414.41	-846846	0.107143
0.35	0.000657481	0.00383964	0.00894789		-7.32709	-5.56238	-4.71634	#NUM!	-4057.21	33.7337	-0.480927	-0.533773	0.108662	0.99999	13.4807	112.085	0.519039	1992.77	-590924	0.125
0.4	0.000766992	0.00447521	0.0104172		-7.17303	-5.4092	-4.5643	#NUM!	-4054.24	33.7089	-0.508528	-0.569528	0.115453	0.999988	13.6196	113.24	0.55148	1677.56	-431946	0.142857
0.45	0.000881137	0.00513639	0.011942		-7.0343	-5.2714	-4.42769	#NUM!	-4051.09	33.6828	-0.53788	-0.631351	0.12257	0.999987	13.7423	114.261	0.585474	1432.65	-327343	0.160714
0.5	0.00100021	0.00582471	0.0135252		-6.90755	-5.14565	-4.3032	#NUM!	-4047.77	33.6552	-0.571663	-0.680632	0.130127	0.999985	13.8521	115.174	0.62157	1235.81	-254483	0.178571
0.55	0.00112455	0.00654182	0.01517		-6.79037	-5.02954	-4.18844	#NUM!	-4044.22	33.6257	-0.605943	-0.710626	0.138067	0.999983	13.9512	115.997	0.659496	1074.99	-201547	0.196429
0.6	0.00125449	0.0072895	0.01688		-6.68103	-4.92132	-4.08163	#NUM!	-4040.48	33.5946	-0.642725	-0.778249	0.14639	0.999981	14.0415	116.748	0.699254	940.582	-162972	0.214286
0.65	0.00139043	0.00806967	0.0186586		-6.57814	-4.81964	-3.98145	#NUM!	-4036.49	33.5614	-0.683768	-0.847873	0.15521	0.999979	14.1241	117.435	0.741381	825.99	-133643	0.232143
0.7	0.00153278	0.00888443	0.0205099		-6.48067	-4.72345	-3.88685	#NUM!	-4032.26	33.5262	-0.727513	-0.913521	0.164515	0.999976	14.2	118.066	0.785827	727.431	-110759	0.25
0.75	0.00168202	0.00973604	0.0224381		-6.38776	-4.63192	-3.79699	#NUM!	-4027.74	33.4886	-0.77512	-0.992719	0.174279	0.999973	14.2699	118.647	0.832471	641.424	-92875.1	0.267857
0.8	0.00183863	0.0106269	0.0244476		-6.29873	-4.54437	-3.71122	#NUM!	-4022.93	33.4487	-0.826784	-1.07564	0.184583	0.99997	14.3344	119.183	0.881686	565.599	-78518.5	0.285714
0.85	0.00200319	0.0115598	0.0265432		-6.21301	-4.46022	-3.62898	#NUM!	-4017.79	33.406	-0.882684	-1.16712	0.195567	0.999966	14.3939	119.678	0.934155	498.225	-66887.8	0.303571
0.9	0.00217629	0.0125375	0.0287302		-6.13013	-4.37903	-3.54981	#NUM!	-4012.32	33.3604	-0.943497	-1.2803	0.207092	0.999961	14.4489	120.135	0.989205	437.803	-57511.6	0.321429
0.95	0.00235863	0.0135633	0.031014		-6.04967	-4.30039	-3.47332	#NUM!	-4006.45	33.3116	-1.01071	-1.39609	0.219361	0.999957	14.4994	120.555	1.04781	383.001	-49678.9	0.339286
1	0.00255095	0.0146405	0.0334007		-5.97129	-4.22396	-3.39918	#NUM!	-4000.16	33.2593	-1.08311	-1.51673	0.232228	0.999951	14.5458	120.941	1.10927	333.328	-43078.5	0.357143
1.05	0.00275408	0.015773	0.0358966		-5.89467	-4.14946	-3.32711	#NUM!	-3993.42	33.2033	-1.16239	-1.66533	0.245905	0.999945	14.588	121.292	1.1746	287.81	-37654.4	0.375
1.1	0.00296894	0.0169648	0.0385085		-5.81955	-4.07661	-3.25688	#NUM!	-3986.18	33.1431	-1.24964	-1.8313	0.260348	0.999938	14.6262	121.61	1.24359	245.808	-33069.4	0.392857
1.15	0.00319658	0.0182205	0.0412439		-5.74567	-4.00521	-3.18825	#NUM!	-3978.39	33.0783	-1.34552	-2.00388	0.275621	0.999931	14.6604	121.894	1.31654	206.873	-29082.8	0.410714
1.2	0.00343815	0.0195451	0.0441106		-5.67282	-3.93503	-3.12106	#NUM!	-3970	33.0085	-1.45003	-2.19661	0.291843	0.999922	14.6904	122.143	1.39403	170.766	-25664.7	0.428571
1.25	0.00369494	0.020944	0.0471173		-5.60079	-3.8659	-3.05512	#NUM!	-3960.95	32.9333	-1.56518	-2.42547	0.308992	0.999912	14.7163	122.359	1.47594	136.975	-22798.3	0.446429
1.3	0.00396842	0.0224231	0.050273		-5.52939	-3.79766	-2.99029	#NUM!	-3951.17	32.852	-1.69257	-2.68076	0.327079	0.999901	14.7378	122.538	1.56234	105.152	-20312.8	0.464286
1.35	0.00426024	0.0239891	0.0535876		-5.45843	-3.73016	-2.92644	#NUM!	-3940.59	32.7641	-1.83325	-2.95801	0.346211	0.999888	14.7548	122.679	1.65372	75.1204	-18108.9	0.482143
1.4	0.00457228	0.0256492	0.0570716		-5.38774	-3.66324	-2.86345	#NUM!	-3929.12	32.6687	-1.98837	-3.26796	0.366385	0.999874	14.767	122.78	1.75009	46.7314	-16177.6	0.5
1.45	0.00490666	0.0274116	0.0607365		-5.31716	-3.59679	-2.80121	#NUM!	-3916.68	32.5652	-2.16005	-3.62613	0.387717	0.999858	14.774	122.839	1.85198	19.7526	-14517.8	0.517857
1.5	0.00526582	0.029285	0.0645943		-5.24652	-3.53068	-2.73963	#NUM!	-3903.15	32.4527	-2.35099	-4.02892	0.410153	0.99984	14.7756	122.852	1.95916	-6.05256	-13053.8	0.535714
1.55	0.00565256	0.0312794	0.0686582		-5.17565	-3.4648	-2.67861	#NUM!	-3888.4	32.3301	-2.56294	-4.4815	0.433767	0.99982	14.7712	122.815	2.07195	-30.737	-11754.3	0.553571
1.6	0.00607009	0.0334056	0.0729421		-5.10438	-3.39903	-2.61809	#NUM!	-3872.32	32.1964	-2.79914	-4.9978	0.458529	0.999797	14.7604	122.725	2.19023	-54.4872	-10615.6	0.571429
1.65	0.00652214	0.0356757	0.0774609		-5.03255	-3.33329	-2.55798	#NUM!	-3854.74	32.0502	-3.06272	-5.58082	0.484428	0.999772	14.7424	122.576	2.31394	-77.4062	-9598.73	0.589286
1.7	0.00701304	0.038103	0.0822306		-4.95998	-3.26746	-2.49823	#NUM!	-3835.48	31.8901	-3.35722	-6.23833	0.511371	0.999743	14.7166	122.362	2.44264	-99.5763	-8685.63	0.607143
1.75	0.00754786	0.0407025	0.0872682		-4.88649	-3.20147	-2.43877	#NUM!	-3814.36	31.7145	-3.68656	-6.98695	0.539319	0.999711	14.6822	122.075	2.57614	-121.067	-7875.41	0.625
1.8	0.00813253	0.0434906	0.0925918		-4.81188	-3.13521	-2.37955	#NUM!	-3791.15	31.5215	-4.05591	-7.84005	0.568106	0.999675	14.6382	121.709	2.71364	-142.006	-7155.25	0.642857
1.85	0.0087741	0.0464855	0.0982206		-4.73595	-3.06861	-2.32054	#NUM!	-3765.58	31.3089	-4.47056	-8.80654	0.597486	0.999636	14.5834	121.254	2.85398	-162.446	-6505.18	0.660714
1.9	0.0094809	0.0497075	0.104175		-4.65848	-3.0016	-2.26168	#NUM!	-3737.38	31.0744	-4.93657	-9.91034	0.627188	0.999593	14.5167	120.699	2.99585	-182.448	-5928.47	0.678571
1.95	0.0102629	0.053179	0.110476		-4.57922	-2.93409	-2.20296	#NUM!	-3706.21	30.8153	-5.46159	-11.1792	0.656854	0.999546	14.4366	120.033	3.13756	-202.128	-5423.32	0.696429
2	0.0111321	0.0569245	0.117146		-4.49792	-2.86603	-2.14433	#NUM!	-3671.69	30.5283	-6.05449	-12.5888	0.685899	0.999495	14.3413	119.241	3.2763	-221.588	-4945.02	0.714286
2.05	0.0121031	0.0609713	0.124208		-4.41429	-2.79735	-2.0858	#NUM!	-3633.39	30.2098	-6.72048	-14.1598	0.713667	0.999442	14.2289	118.306	3.40893	-240.661	-4498.9	0.732143
2.1	0.0131934	0.0653489	0.131688		-4.32804	-2.72801	-2.02732	#NUM!	-3590.86	29.8562	-7.47046	-15.9702	0.739151	0.999387	14.0974	117.213	3.53066	-259.488	-4120.13	0.75
2.15	0.0144247	0.0700899	0.139609		-4.23881	-2.65798	-1.96891	#NUM!	-3543.54	29.4628	-8.31749	-17.9905	0.761411	0.999333	13.9443	115.94	3.63699	-278.231	-3772.44	0.767857
2.2	0.0158237	0.0752293	0.147998		-4.14625	-2.58721	-1.91056	#NUM!	-3490.83	29.0245	-9.26951	-20.1923	0.778938	0.99928	13.7668	114.464	3.72071	-296.762	-3437.55	0.785714
2.25	0.0174233	0.0808048	0.15688		-4.04995	-2.51572	-1.85227	#NUM!	-3432.05	28.5358	-10.3367	-22.5562	0.790165	0.999234	13.5619	112.76	3.77433	-315.064	-3112.69	0.803571
2.3	0.0192645	0.0868563	0.166282		-3.94949	-2.4435	-1.79407	#NUM!	-3366.5	27.9908	-11.5251	-25.0247	0.793032	0.999198	13.3262	110.801	3.78803	-332.953	-2789.52	0.821429
2.35	0.0213981	0.0934262	0.176231		-3.84445	-2.37058	-1.73596	#NUM!	-3293.44	27.3833	-12.8392	-27.4848	0.78533	0.999178	13.0565	108.558	3.75124	-350.272	-2459.31	0.839286
2.4	0.0238874	0.100558	0.186752		-3.7344	-2.29702	-1.67797	#NUM!	-3212.08	26.7069	-14.2736	-29.6952	0.764601	0.999181	12.749	106.002	3.65223	-366.65	-2096.57	0.857143
2.45	0.0268101	0.108296	0.197871		-3.61898	-2.22289	-1.62014	#NUM!	-3121.77	25.9559	-15.8087	-31.3248	0.728309	0.999213	12.4007	103.106	3.47887	-381.447	-1684.46	0.875
2.5	0.0302609	0.116685	0.209612		-3.4979	-2.14828	-1.5625	#NUM!	-3021.95	25.126	-17.4061	-31.9117	0.6742	0.999281	12.0091	99.85	3.22041	-393.815	-1210.66	0.892857
2.55	0.034352	0.125768	0.222		-3.3711	-2.07332	-1.50508	#NUM!	-2912.42	24.2153	-18.9999	-30.8821	0.60044	0.999386	11.5732	96.2251	2.86809	-402.6	-668.672	0.910714
2.6	0.0392114	0.135586	0.235056		-3.23879	-1.99815	-1.44793	#NUM!	-2793.43	23.226	-20.4943	-27.6167	0.50647	0.999525	11.0939	92.2404	2.41923	-406.453	-59.0848	0.928571
2.65	0.0449765	0.146175	0.2488		-3.10162	-1.92295	-1.39111	#NUM!	-2665.93	22.1659	-21.7616	-21.6949	0.393236	0.999685	10.5756	87.9307	1.87835	-403.806	589.022	0.946429
2.7	0.0517814	0.15757	0.263251		-2.96072	-1.84789	-1.33465	#NUM!	-2531.7	21.0499	-22.6638	-13.2187	0.264202	0.999842	10.0262	83.3632	1.262	-393.504	1211.17	0.964286
2.75	0.0597398	0.169796	0.278425		-2.81776	-1.77316	-1.27861	#NUM!	-2393.35	19.8995	-23.0834	-2.91868	0.124629	0.999961	9.45766	78.6357	0.595309	-375.197	1737.84	0.982143
2.8	0.0689265	0.182874	0.294337		-2.67471	-1.69896	-1.22303	#NUM!	-2254.08	18.7415	-22.9557	7.90119	0.0183897	0.999999	8.88438	73.8692	0.0878412	-349.53	2107.19	1
2.85	0.0793644	0.196817	0.310998		-2.53371	-1.62548	-1.16797	#NUM!	-2117.26	17.6039	-22.2933	17.7271	0.157265	0.99992	8.32173	69.191	0.751198	-318.258	2284.65	1.01786
2.9	0.0910238	0.211633	0.328418		-2.39663	-1.5529	-1.11347	#NUM!	-1985.95	16.5122	-21.1829	25.3666	0.285142	0.999702	7.78356	64.7164	1.36202	-283.826	2279.14	1.03571
2.95	0.103833	0.227321	0.346605		-2.26497	-1.48139	-1.05957	#NUM!	-1862.49	15.4857	-19.7566	30.2829	0.397193	0.999343	7.28044	60.5332	1.89725	-248.735	2134.43	1.05357
3	0.117695	0.243876	0.365564		-2.13966	-1.4111	-1.00631	#NUM!	-1748.33	14.5365	-18.1547	32.5786	0.490658	0.998862	6.81898	56.6964	2.3437	-215.005	1905.89	1.07143
3.05	0.132505	0.261288	0.3853		-2.02113	-1.34213	-0.953733	#NUM!	-1644.14	13.6702	-16.4988	32.7631	0.564905	0.998295	6.40208	53.2301	2.69835	-183.998	1643.32	1.08929
3.1	0.148162	0.279543	0.405813		-1.90945	-1.2746	-0.901863	#NUM!	-1549.9	12.8866	-14.8783	31.4949	0.620748	0.997685	6.02968	50.1338	2.96509	-156.393	1383	1.10714
3.15	0.164577	0.298625	0.427105		-1.80438	-1.20857	-0.850725	#NUM!	-1465.19	12.1824	-13.3493	29.3679	0.660028	0.997073	5.69979	47.3909	3.15272	-132.361	1145.74	1.125
3.2	0.181674	0.318514	0.449176		-1.70554	-1.14409	-0.80034	#NUM!	-1389.35	11.5517	-11.9416	26.8178	0.685098	0.996495	5.40929	44.9756	3.27247	-111.743	940.176	1.14286
3.25	0.199391	0.339192	0.472025		-1.61249	-1.08119	-0.750723	#NUM!	-1321.57	10.9882	-10.6675	24.1395	0.69828	0.995978	5.15459	42.8578	3.33543	-94.2205	767.179	1.16071
3.3	0.217679	0.360641	0.495649		-1.52473	-1.01987	-0.701887	#NUM!	-1261.05	10.485	-9.52761	21.5333	0.701778	0.99554	4.93191	41.0063	3.35214	-79.4236	624.647	1.17857
3.35	0.2365	0.382841	0.520047		-1.44181	-0.960136	-0.653836	#NUM!	-1206.98	10.0354	-8.51419	19.1085	0.697726	0.995189	4.73763	39.3911	3.33279	-66.9553	508.924	1.19643
3.4	0.255824	0.405776	0.545217		-1.36327	-0.901954	-0.606571	#NUM!	-1158.64	9.63354	-7.61675	16.9033	0.687826	0.994928	4.56844	37.9843	3.2855	-56.4533	415.335	1.21429
3.45	0.275628	0.42943	0.571156		-1.2887	-0.845297	-0.560093	#NUM!	-1115.37	9.27376	-6.82385	14.9243	0.673537	0.994753	4.42131	36.7609	3.21724	-47.6052	339.718	1.23214
3.5	0.295895	0.453789	0.597863		-1.21775	-0.790123	-0.514394	#NUM!	-1076.57	8.95116	-6.12432	13.1631	0.656081	0.994656	4.29354	35.6986	3.13386	-40.1424	278.576	1.25
3.55	0.316614	0.478842	0.625337		-1.15007	-0.736385	-0.469465	#NUM!	-1041.71	8.66133	-5.50754	11.6142	0.636423	0.99463	4.18274	34.7774	3.03997	-33.8402	229.14	1.26786
3.6	0.337777	0.504579	0.653577		-1.08537	-0.684031	-0.425295	#NUM!	-1010.33	8.4004	-4.9629	10.2594	0.615338	0.994663	4.08682	33.9799	2.93925	-28.5044	189.131	1.28571
3.65	0.359378	0.530991	0.682582		-1.02338	-0.63301	-0.381873	#NUM!	-982.024	8.16504	-4.4816	9.07901	0.593432	0.994745	4.00396	33.291	2.83461	-23.9772	156.711	1.30357
3.7	0.381416	0.558073	0.712354		-0.963865	-0.583266	-0.33918	#NUM!	-956.431	7.95224	-4.055	8.0453	0.571184	0.994867	3.93256	32.6973	2.72834	-20.1213	130.215	1.32143
3.75	0.403888	0.585821	0.742894		-0.906618	-0.534741	-0.297202	#NUM!	-933.254	7.75954	-3.67707	7.13411	0.548904	0.995021	3.87127	32.1877	2.62192	-16.8376	108.395	1.33929
3.8	0.426799	0.614231	0.774205		-0.851442	-0.487384	-0.255919	#NUM!	-912.206	7.58454	-3.34159	6.34411	0.52695	0.995196	3.81883	31.7517	2.51705	-14.034	90.5711	1.35714
3.85	0.450149	0.643304	0.80629		-0.798177	-0.441138	-0.215312	#NUM!	-893.064	7.42538	-3.04266	5.65108	0.505434	0.995388	3.77425	31.381	2.41428	-11.6313	75.8447	1.375
3.9	0.473944	0.67304	0.839153		-0.746666	-0.395951	-0.175362	#NUM!	-875.611	7.28027	-2.77648	5.04175	0.484532	0.99559	3.73657	31.0677	2.31444	-9.57367	63.629	1.39286
3.95	0.498189	0.703442	0.8728		-0.696776	-0.35177	-0.136049	#NUM!	-859.671	7.14773	-2.53848	4.5141	0.464329	0.995798	3.705	30.8052	2.21794	-7.80473	53.5713	1.41071
4	0.522891	0.734514	0.907238		-0.648382	-0.308546	-0.0973505	#NUM!	-845.081	7.02642	-2.32507	4.04652	0.444897	0.996007	3.67886	30.5879	2.12511	-6.28043	45.1381	1.42857
4.05	0.548056	0.766261	0.942475		-0.601378	-0.266232	-0.0592459	#NUM!	-831.707	6.91522	-2.13383	3.63195	0.426268	0.996215	3.65755	30.4107	2.03613	-4.9692	38.062	1.44643
4.1	0.573694	0.798689	0.978518		-0.555659	-0.224784	-0.0217161	#NUM!	-819.417	6.81304	-1.96187	3.27002	0.408467	0.996418	3.64051	30.269	1.9511	-3.8378	32.1763	1.46429
4.15	0.599813	0.831808	1.01538		-0.511137	-0.184154	0.0152629	#NUM!	-808.111	6.71904	-1.80683	2.93616	0.391479	0.996617	3.6273	30.1592	1.86996	-2.86014	27.0719	1.48214
4.2	0.626424	0.865625	1.05307		-0.467728	-0.144303	0.0517097	#NUM!	-797.686	6.63236	-1.66826	2.64913	0.375323	0.996808	3.61748	30.0775	1.79278	-2.02571	22.8624	1.5
4.25	0.653537	0.900152	1.09159		-0.425356	-0.105192	0.0876353	#NUM!	-788.046	6.55221	-1.54192	2.41897	0.359858	0.996993	3.61065	30.0207	1.71892	-1.29763	19.5625	1.51786
4.3	0.681162	0.935399	1.13097		-0.383955	-0.0667821	0.123076	#NUM!	-779.141	6.47816	-1.42636	2.19343	0.345229	0.997168	3.60659	29.987	1.64904	-0.660756	16.5623	1.53571
4.35	0.709313	0.97138	1.17122		-0.343458	-0.0290375	0.158046	#NUM!	-770.891	6.40957	-1.32257	1.98086	0.33136	0.997334	3.60499	29.9737	1.58279	-0.117933	13.9002	1.55357
4.4	0.738002	1.00811	1.21235		-0.303809	0.00807729	0.192561	#NUM!	-763.234	6.34591	-1.22828	1.79911	0.318151	0.997493	3.60556	29.9784	1.5197	0.34994	11.7138	1.57143
4.45	0.767242	1.0456	1.25438		-0.264953	0.0445909	0.226641	#NUM!	-756.118	6.28675	-1.14266	1.63869	0.305655	0.997642	3.60811	29.9996	1.46	0.751463	9.87517	1.58929
4.5	0.797047	1.08387	1.29732		-0.226842	0.080538	0.260301	#NUM!	-749.491	6.23164	-1.06441	1.50575	0.293723	0.997783	3.61241	30.0354	1.40301	1.09808	8.39887	1.60714
4.55	0.827432	1.12293	1.3412		-0.189428	0.115941	0.293565	#NUM!	-743.317	6.18031	-0.992089	1.37874	0.282502	0.997915	3.61832	30.0845	1.34941	1.40095	7.07732	1.625
4.6	0.858412	1.1628	1.38604		-0.152671	0.150831	0.326451	#NUM!	-737.559	6.13243	-0.926532	1.25367	0.271923	0.998038	3.62571	30.1459	1.29888	1.6567	5.86178	1.64286
4.65	0.890004	1.20351	1.43185		-0.116529	0.185242	0.358967	#NUM!	-732.173	6.08765	-0.866723	1.14822	0.26175	0.998155	3.63438	30.218	1.25029	1.87329	4.87755	1.66071
4.7	0.922224	1.24507	1.47866		-0.0809671	0.219192	0.391136	#NUM!	-727.135	6.04576	-0.81171	1.05804	0.252129	0.998264	3.64424	30.3	1.20433	2.05797	4.07243	1.67857
4.75	0.95509	1.2875	1.52649		-0.0459497	0.252702	0.422971	#NUM!	-722.411	6.00648	-0.760918	0.987251	0.24302	0.998366	3.65517	30.3909	1.16082	2.21533	3.45075	1.69643
4.8	0.98862	1.33083	1.57537		-0.0114452	0.285803	0.45449	#NUM!	-717.983	5.96967	-0.712985	0.903488	0.234343	0.998461	3.66709	30.49	1.11937	2.35391	2.794	1.71429
4.85	1.02283	1.37508	1.62533		0.0225733	0.318512	0.485711	#NUM!	-713.835	5.93518	-0.67057	0.81615	0.226119	0.998551	3.67996	30.597	1.08009	2.46003	2.16379	1.73214
4.9	1.05775	1.42028	1.67638		0.056144	0.350854	0.516637	#NUM!	-709.918	5.90261	-0.63137	0.766124	0.218211	0.998635	3.69356	30.7101	1.04232	2.54746	1.79727	1.75
4.95	1.09339	1.46644	1.72857		0.089283	0.382838	0.547294	#NUM!	-706.242	5.87205	-0.593957	18.1764	0.210832	0.998713	3.70795	30.8298	1.00707	2.62423	197.965	1.76786
5	1.12978	1.51361	1.78192		0.122023	0.414498	0.577691	#NUM!	-702.774	5.84322	1.18627	-0.119991	0.203709	0.998786	3.72301	30.955	0.973045	21.0236	1.78952	1.78571

## Sheet: Qst_Fe-PCN-224_LT
	Units = K		1/T1	1/T2	1/T3	1/T4
T1	141		0.0070922	0.00641026	0.00512821	0.00442478							n min	0.05				-∆H	31.8
T2	156												Interval	0.05				-∆S	121.2
T3	195																	-∆S corrected	122.2
T4	226																	Accesible sites	0.55	mmol/g
																		Low-loading	0.45	mmol/g
n (mmol/g)	P (T1)	P (T2)	P (T3)	P (T4)	lnP (T1)	lnP (T2)	lnP (T3)	lnp (T4)	dlnP/dT	∆H	1st derivative	2nd derivative	Qst std error	R2	Y-int	∆S	∆S std erro	1st derivative	2nd derivative	Surface coverage
0.05	1.44897e-06	6.15685e-07	0.000584688	0.00870194	-13.4447	-14.3005	-7.44443	-4.74421	-3350.77	27.86			13.9347	0.799892	9.07917	75.4887	87.278			0.0909091
0.1	2.25326e-06	3.09926e-06	0.00173495	0.0213757	-13.0031	-12.6843	-6.35678	-3.8455	-3584.17	29.8006	31.3852		9.42943	0.908992	11.5771	96.2576	59.0599	338.349		0.181818
0.15	3.0204e-06	8.77793e-06	0.0034802	0.0375739	-12.7101	-11.6433	-5.66067	-3.28145	-3728.25	30.9985	20.8321	-155.829	6.54652	0.957304	13.1486	109.324	41.0032	230.067	-1570.04	0.272727
0.2	3.83876e-06	1.99395e-05	0.00598884	0.0576373	-12.4704	-10.8228	-5.11786	-2.85359	-3834.72	31.8838	15.8023	-85.2057	4.29236	0.982199	14.3441	119.264	26.8846	181.346	-786.616	0.363636
0.25	4.78102e-06	4.07633e-05	0.00953185	0.0820377	-12.2509	-10.1077	-4.65312	-2.50058	-3918.31	32.5787	12.3115	-69.4396	2.3466	0.994839	15.3296	127.458	14.6976	151.405	-546.187	0.454545
0.3	5.95013e-06	7.93555e-05	0.0145071	0.111251	-12.0321	-9.44157	-4.23312	-2.19597	-3982.8	33.115	8.8583	-83.115	0.556834	0.999717	16.1651	134.405	3.48765	126.727	-541.859	0.545455
0.35	7.54201e-06	0.000152639	0.0214581	0.145664	-11.795	-8.78743	-3.84165	-1.92645	-4024.85	33.4646	4.00001	-142.828	1.16625	0.998787	16.8538	140.131	7.30465	97.2192	-822.874	0.636364
0.4	1.00414e-05	0.000299378	0.0310341	0.185505	-11.5088	-8.1138	-3.47267	-1.68467	-4030.9	33.515	-5.42452	-497.542	2.86664	0.992737	17.3344	144.127	17.9548	44.4397	-2733.27	0.727273
0.45	1.52673e-05	0.000618961	0.0438098	0.2308	-11.0898	-7.38747	-3.1279	-1.4662	-3959.6	32.9221	-45.7542	-1620.24	4.44587	0.98209	17.3883	144.575	27.8461	-176.108	-8853.87	0.818182
0.5	5.49596e-05	0.00139565	0.0599736	0.281385	-9.80891	-6.5744	-2.81385	-1.26803	-3480.61	28.9395	-167.449	-1106.52	3.81959	0.982878	15.2163	126.516	23.9235	-840.947	-6087.26	0.909091
0.55	0.00200773	0.0034152	0.0791379	0.336955	-6.21075	-5.67952	-2.53656	-1.08781	-1945.66	16.1772	-156.406	1239.66	3.52969	0.954557	7.27406	60.4802	22.1077	-784.834	6621.98	1
0.6	0.00486366	0.00786534	0.100523	0.397132	-5.32596	-4.84529	-2.29737	-0.923487	-1599.49	13.2989	-43.4834	1327.32	2.70665	0.960226	5.77696	48.0326	16.9527	-178.75	7018.1	1.09091
0.65	0.0080842	0.0146676	0.123325	0.461527	-4.81784	-4.22211	-2.09293	-0.773215	-1422.68	11.8289	-23.6744	284.064	1.66129	0.980657	5.12421	42.6052	10.4053	-83.0239	1330.03	1.18182
0.7	0.0115708	0.0227674	0.14694	0.529787	-4.45927	-3.78243	-1.91773	-0.63528	-1314.75	10.9315	-15.0769	130.804	0.974879	0.99211	4.77842	39.7302	6.10602	-45.7467	551.426	1.27273
0.75	0.0152744	0.0315121	0.170983	0.601617	-4.18158	-3.45738	-1.76619	-0.508134	-1241.35	10.3212	-10.594	70.8685	0.542743	0.997242	4.574	38.0306	3.39939	-27.8813	274.586	1.36364
0.8	0.0191648	0.0406255	0.195235	0.676789	-3.95468	-3.20336	-1.63355	-0.390396	-1187.34	9.87211	-7.99007	42.5337	0.258977	0.999312	4.44309	36.9421	1.62207	-18.2881	152.171	1.45455
0.85	0.0232219	0.0499891	0.219581	0.755141	-3.76266	-2.99595	-1.51603	-0.280851	-1145.25	9.52219	-6.34059	27.6941	0.0633807	0.999956	4.35405	36.2017	0.396976	-12.6642	91.6767	1.54545
0.9	0.027431	0.0595479	0.243969	0.836568	-3.59608	-2.82097	-1.41071	-0.178447	-1111.08	9.23805	-5.22066	19.2312	0.0772717	0.99993	4.29077	35.6756	0.483981	-9.12042	59.1411	1.63636
0.95	0.031781	0.0692752	0.26838	0.921017	-3.44889	-2.66967	-1.31535	-0.0822768	-1082.46	9.00013	-4.41748	14.0562	0.182084	0.999591	4.24436	35.2897	1.14046	-6.75007	40.4241	1.72727
1	0.0362632	0.0791574	0.292816	1.00848	-3.31695	-2.53632	-1.22821	0.00844425	-1057.95	8.7963	-3.81504	10.7048	0.262536	0.99911	4.20959	35.0006	1.64436	-5.07802	29.0361	1.81818
1.05	0.0408708	0.0891882	0.317293	1.09898	-3.19734	-2.41701	-1.14793	0.0943825	-1036.58	8.61862	-3.347	8.42363	0.325849	0.998573	4.18328	34.7819	2.04091	-3.84646	21.7344	1.90909
1.1	0.0455981	0.0993653	0.341828	1.19259	-3.08789	-2.30895	-1.07345	0.176127	-1017.69	8.4616	-2.97268	6.81482	0.376793	0.998021	4.16333	34.616	2.35999	-2.90458	16.8947	2
1.15	0.0504404	0.109689	0.366445	1.28938	-2.98696	-2.21011	-1.00391	0.254161	-1000.82	8.32136	-2.66552	5.64056	0.418595	0.997476	4.14835	34.4914	2.62181	-2.157	13.5702	2.09091
1.2	0.0553938	0.120159	0.391169	1.38948	-2.89329	-2.11894	-0.938616	0.32893	-985.633	8.19505	-2.40862	4.75528	0.453427	0.996948	4.13739	34.4003	2.83998	-1.54755	11.195	2.18182
1.25	0.0604551	0.13078	0.416025	1.49303	-2.80585	-2.03424	-0.87701	0.400808	-971.856	8.08049	-2.18999	4.07586	0.482987	0.99644	4.12974	34.3367	3.02513	-1.0375	9.4695	2.27273
1.3	0.0656214	0.141553	0.441039	1.60018	-2.72385	-1.95508	-0.818622	0.470116	-959.294	7.97605	-2.00104	3.54192	0.508378	0.995954	4.12491	34.2965	3.18416	-0.600605	8.1818	2.36364
1.35	0.0708904	0.152482	0.466236	1.71112	-2.64662	-1.88071	-0.763063	0.537148	-947.789	7.88039	-1.8358	3.11539	0.530494	0.995489	4.12251	34.2766	3.32268	-0.219319	7.20492	2.45455
1.4	0.0762599	0.163572	0.491642	1.82606	-2.57361	-1.8105	-0.710004	0.602161	-937.214	7.79247	-1.6895	2.7703	0.55004	0.995042	4.12227	34.2746	3.4451	0.119887	6.45197	2.54545
1.45	0.0817282	0.174825	0.517282	1.94523	-2.50436	-1.74397	-0.659167	0.66538	-927.469	7.71144	-1.55877	2.48701	0.567459	0.994614	4.12395	34.2886	3.5542	0.425878	5.86693	2.63636
1.5	0.0872938	0.186247	0.543182	2.06888	-2.43848	-1.68068	-0.610311	0.727007	-918.467	7.63659	-1.4408	2.25137	0.583194	0.994202	4.12739	34.3172	3.65276	0.70658	5.40032	2.72727
1.55	0.0929552	0.197842	0.569368	2.19729	-2.37564	-1.62029	-0.563228	0.787225	-910.14	7.56736	-1.33363	2.05389	0.597547	0.993803	4.13245	34.3593	3.74265	0.965911	5.02559	2.81818
1.6	0.0987115	0.209614	0.595864	2.33078	-2.31555	-1.56249	-0.517743	0.846203	-902.427	7.50323	-1.23541	1.88561	0.610746	0.993418	4.13901	34.4138	3.82532	1.20914	4.72083	2.90909
1.65	0.104561	0.221569	0.622697	2.46968	-2.25798	-1.50702	-0.473695	0.904089	-895.281	7.44382	-1.14507	1.74093	0.623035	0.993043	4.14699	34.4802	3.90229	1.43799	4.46748	3
1.7	0.110504	0.233712	0.649892	2.61437	-2.2027	-1.45367	-0.430949	0.961023	-888.655	7.38872	-1.06132	1.61932	0.63454	0.992679	4.1563	34.5576	3.97435	1.65589	4.27475	3.09091
1.75	0.116539	0.246047	0.677478	2.76525	-2.14953	-1.40223	-0.389378	1.01713	-882.517	7.33769	-0.983139	1.51378	0.645385	0.992323	4.16691	34.6458	4.04228	1.86547	4.11633	3.18182
1.8	0.122666	0.258581	0.70548	2.9228	-2.09829	-1.35255	-0.348877	1.07254	-876.831	7.29041	-0.909939	1.42538	0.6557	0.991976	4.17874	34.7441	4.10689	2.06752	4.00422	3.27273
1.85	0.128884	0.271319	0.733928	3.0875	-2.04884	-1.30446	-0.309344	1.12736	-871.573	7.24669	-0.840601	1.34698	0.665567	0.991635	4.19178	34.8525	4.16869	2.26589	3.90748	3.36364
1.9	0.135192	0.284266	0.762849	3.25992	-2.00106	-1.25784	-0.270695	1.1817	-866.721	7.20635	-0.775241	1.27428	0.675066	0.991301	4.20599	34.9707	4.22818	2.45827	3.81041	3.45455
1.95	0.141591	0.29743	0.792274	3.44067	-1.95481	-1.21258	-0.232848	1.23567	-862.249	7.16917	-0.713173	1.21726	0.684255	0.990973	4.22134	35.0984	4.28574	2.64693	3.76991	3.54545
2	0.14808	0.310815	0.822234	3.63044	-1.91	-1.16856	-0.19573	1.28935	-858.143	7.13503	-0.653515	1.16796	0.693167	0.99065	4.23783	35.2354	4.34156	2.83526	3.74596	3.63636
2.05	0.154658	0.32443	0.852761	3.82999	-1.86654	-1.12569	-0.159276	1.34286	-854.389	7.10382	-0.596377	1.1192	0.7019	0.990332	4.25544	35.3819	4.39626	3.02153	3.70262	3.72727
2.1	0.161326	0.338279	0.883889	4.04016	-1.82433	-1.08388	-0.123424	1.39628	-850.97	7.07539	-0.541595	1.07882	0.710425	0.990019	4.27417	35.5376	4.44965	3.20552	3.68745	3.81818
2.15	0.168084	0.35237	0.915653	4.26194	-1.78329	-1.04307	-0.0881178	1.44972	-847.875	7.04966	-0.488495	1.04578	0.718788	0.989711	4.294	35.7024	4.50203	3.39027	3.69684	3.90909
2.2	0.174931	0.366711	0.94809	4.49637	-1.74336	-1.00318	-0.0533058	1.50327	-845.095	7.02654	-0.437017	1.01691	0.727041	0.989407	4.31494	35.8766	4.55372	3.57521	3.7137	4
2.25	0.181868	0.381309	0.981238	4.7447	-1.70447	-0.964145	-0.0189402	1.55703	-842.619	7.00596	-0.386804	0.992423	0.735182	0.989108	4.337	36.06	4.60471	3.76164	3.74416	4.09091
2.3	0.188894	0.396171	1.01514	5.00829	-1.66657	-0.925909	0.0150265	1.61109	-840.443	6.98786	-0.337774	0.970108	0.743234	0.988814	4.36019	36.2528	4.65514	3.94962	3.77352	4.18182
2.35	0.196011	0.411306	1.04984	5.28872	-1.62958	-0.888418	0.0486378	1.66558	-838.557	6.97218	-0.289793	0.953318	0.75119	0.988525	4.3845	36.4549	4.70497	4.13899	3.82036	4.27273
2.4	0.203217	0.426721	1.08538	5.58778	-1.59348	-0.851625	0.0819302	1.72058	-836.958	6.95888	-0.242442	0.941704	0.759085	0.988241	4.40997	36.6667	4.75443	4.33166	3.89477	4.36364
2.45	0.210513	0.442426	1.12181	5.90755	-1.55821	-0.815482	0.114943	1.77623	-835.641	6.94793	-0.195622	0.929948	0.766929	0.987962	4.4366	36.8881	4.80355	4.52847	3.9587	4.45455
2.5	0.2179	0.458429	1.15919	6.25041	-1.52372	-0.77995	0.147721	1.83265	-834.605	6.93932	-0.149448	0.923325	0.774691	0.98769	4.46443	37.1195	4.85217	4.72753	4.04161	4.54545
2.55	0.225377	0.47474	1.19756	6.61913	-1.48998	-0.744988	0.180286	1.88996	-833.843	6.93299	-0.10329	0.920109	0.782424	0.987424	4.49346	37.3608	4.90061	4.93263	4.14091	4.63636
2.6	0.232945	0.491368	1.237	7.01697	-1.45695	-0.710562	0.212689	1.94833	-833.363	6.92899	-0.0574367	0.915628	0.790081	0.987165	4.52376	37.6128	4.94857	5.14162	4.22532	4.72727
2.65	0.240604	0.508324	1.27755	7.44775	-1.4246	-0.676636	0.244944	2.00791	-833.152	6.92725	-0.0117271	0.918548	0.797708	0.986913	4.55529	37.875	4.99633	5.35517	4.35109	4.81818
2.7	0.248355	0.525618	1.3193	7.916	-1.3929	-0.643181	0.277101	2.06889	-833.221	6.92782	0.0344181	0.925637	0.805258	0.986669	4.58816	38.1483	5.04362	5.57673	4.49625	4.90909
2.75	0.256198	0.54326	1.36231	8.42713	-1.3618	-0.610167	0.309182	2.13146	-833.566	6.93069	0.0808366	0.93083	0.812741	0.986435	4.62237	38.4327	5.09049	5.80479	4.62334	5
2.8	0.264133	0.561263	1.40667	8.98768	-1.3313	-0.577566	0.341225	2.19585	-834.194	6.9359	0.127501	0.935123	0.820157	0.98621	4.65798	38.7288	5.13694	6.03906	4.74104	5.09091
2.85	0.272161	0.579638	1.45245	9.60561	-1.30136	-0.545352	0.373252	2.26235	-835.1	6.94344	0.174349	0.947721	0.8275	0.985996	4.695	39.0366	5.18293	6.27889	4.908	5.18182
2.9	0.280283	0.598397	1.49975	10.2907	-1.27196	-0.513501	0.405298	2.33124	-836.291	6.95334	0.222273	0.96869	0.834743	0.985793	4.7335	39.3567	5.2283	6.52986	5.12405	5.27273
2.95	0.288498	0.617554	1.54867	11.0551	-1.24307	-0.481989	0.437396	2.40289	-837.773	6.96566	0.271218	#NUM!	0.841898	0.985602	4.77354	39.6896	5.27311	6.7913	#NUM!	5.36364
3	0.296807	0.637121	1.59932	11.9142	-1.21467	-0.450796	0.469579	2.47773	-839.553	6.98046	#NUM!	#NUM!	0.848933	0.985425	4.81518	40.0358	5.31717	#NUM!	#NUM!	5.45455
3.05					#NUM!	#NUM!	#NUM!	#NUM!	#NUM!	#NUM!	#NUM!	#NUM!	#VALUE!	#VALUE!	#NUM!	#NUM!	#VALUE!	#NUM!	#NUM!	5.54545
3.1					#NUM!	#NUM!	#NUM!	#NUM!	#NUM!	#NUM!	#NUM!	#NUM!	#VALUE!	#VALUE!	#NUM!	#NUM!	#VALUE!	#NUM!	#NUM!	5.63636
3.15	5.95757	8.99941	9.48497		1.78466	2.19716	2.24971	#NUM!	-211.536	1.75881	#NUM!	#NUM!	1.19006	0.685956	3.39086	28.1933	7.45376	#NUM!	#NUM!	5.72727
3.2	6.1694	9.21928	9.69493		1.8196	2.2213	2.2716	#NUM!	-205.525	1.70884	-1.00527	#NUM!	1.16032	0.684435	3.38052	28.1074	7.26753	-1.778	#NUM!	5.81818
3.25	6.38789	9.4408	9.90646		1.8544	2.24504	2.29319	#NUM!	-199.445	1.65829	-1.01741	-0.247359	1.12966	0.683033	3.36948	28.0155	7.07544	-1.89898	-2.42117	5.90909
3.3	6.61335	9.66397	10.1195		1.88909	2.2684	2.31446	#NUM!	-193.288	1.6071	-1.03	-0.259443	1.09805	0.681741	3.35768	27.9175	6.87749	-2.02011	-2.44876	6
3.35	6.84611	9.88878	10.3342		1.92368	2.2914	2.33546	#NUM!	-187.057	1.55529	-1.04336	-0.282831	1.06547	0.680593	3.34518	27.8135	6.67339	-2.14386	-2.55363	6.09091
3.4	7.0865	10.1152	10.5504		1.95819	2.31404	2.35616	#NUM!	-180.74	1.50276	-1.05829	-0.303377	1.03191	0.679569	3.3319	27.7031	6.4632	-2.27548	-2.63728	6.18182
3.45	7.33491	10.3433	10.7681		1.99265	2.33634	2.37659	#NUM!	-174.329	1.44946	-1.07369	-0.315171	0.99738	0.678661	3.31781	27.586	6.24695	-2.40758	-2.66744	6.27273
3.5	7.59173	10.573	10.9874		2.02706	2.3583	2.39675	#NUM!	-167.826	1.39539	-1.0898	-0.33177	0.961821	0.677915	3.30294	27.4623	6.02423	-2.54222	-2.72911	6.36364
3.55	7.85737	10.8043	11.2082		2.06145	2.37994	2.41665	#NUM!	-161.222	1.34048	-1.10687	-0.349449	0.925228	0.67732	3.28724	27.3317	5.79504	-2.6805	-2.79826	6.45455
3.6	8.13229	11.0373	11.4306		2.09584	2.40128	2.43629	#NUM!	-154.514	1.2847	-1.12475	-0.369941	0.887607	0.676888	3.2707	27.1943	5.55941	-2.82205	-2.89124	6.54545
3.65	8.41696	11.2718	11.6545		2.13025	2.4223	2.45569	#NUM!	-147.694	1.228	-1.14386	-0.388071	0.848867	0.676664	3.2533	27.0495	5.31676	-2.96962	-2.96514	6.63636
3.7	8.71189	11.508	11.8799		2.16469	2.44304	2.47485	#NUM!	-140.756	1.17032	-1.16356	-0.403405	0.80907	0.676622	3.23499	26.8973	5.0675	-3.11856	-3.01951	6.72727
3.75	9.01764	11.7457	12.1069		2.19918	2.46349	2.49378	#NUM!	-133.7	1.11165	-1.1842	-0.426536	0.76809	0.676862	3.21579	26.7377	4.81082	-3.27157	-3.12788	6.81818
3.8	9.33479	11.9851	12.3354		2.23375	2.48366	2.51247	#NUM!	-126.514	1.0519	-1.20621	-0.447257	0.725996	0.677348	3.19564	26.5701	4.54718	-3.43135	-3.21908	6.90909
3.85	9.66398	12.226	12.5654		2.26841	2.50356	2.53095	#NUM!	-119.193	0.991027	-1.22893	-0.462461	0.682677	0.678184	3.17452	26.3945	4.27585	-3.59348	-3.27601	7
3.9	10.0059	12.4686	12.797		2.30317	2.52321	2.54921	#NUM!	-111.733	0.929005	-1.25245	-0.4862	0.638162	0.679406	3.15242	26.2108	3.99704	-3.75895	-3.39189	7.09091
3.95	10.3612	12.7127	13.0301		2.33807	2.5426	2.56726	#NUM!	-104.129	0.865782	-1.27755	-0.516826	0.592379	0.681131	3.12931	26.0186	3.71028	-3.93267	-3.54435	7.18182
4	10.7308	12.9584	13.2647		2.37312	2.56174	2.58511	#NUM!	-96.3677	0.80125	-1.30414	-0.540445	0.545288	0.68346	3.10512	25.8175	3.41533	-4.11339	-3.65423	7.27273
4.05	11.1155	13.2057	13.5008		2.40834	2.58065	2.60275	#NUM!	-88.4441	0.735368	-1.33159	-0.558541	0.496865	0.686565	3.07984	25.6073	3.11204	-4.29809	-3.73045	7.36364
4.1	11.5162	13.4545	13.7384		2.44375	2.59931	2.62019	#NUM!	-80.3524	0.66809	-1.35999	-0.582011	0.447038	0.690736	3.05343	25.3877	2.79996	-4.48643	-3.83523	7.45455
4.15	11.9339	13.705	13.9776		2.47938	2.61776	2.63746	#NUM!	-72.0872	0.599369	-1.3898	-0.613462	0.395819	0.696322	3.02588	25.1587	2.47916	-4.68161	-3.99792	7.54545
4.2	12.3697	13.957	14.2183		2.51525	2.63598	2.65453	#NUM!	-63.6371	0.529111	-1.42134	-0.645213	0.343096	0.703991	2.99712	24.9196	2.14893	-4.88622	-4.15967	7.63636
4.25	12.8248	14.2105	14.4605		2.55138	2.65398	2.67142	#NUM!	-54.9925	0.457235	-1.45432	-0.673245	0.288811	0.714808	2.96711	24.67	1.80893	-5.09758	-4.29404	7.72727
4.3	13.3004	14.4657	14.7042		2.58779	2.67178	2.68813	#NUM!	-46.1457	0.383679	-1.48866	-0.705308	0.232995	0.730582	2.93581	24.4098	1.45933	-5.31563	-4.45561	7.81818
4.35	13.7979	14.7224	14.9494		2.62452	2.68937	2.70467	#NUM!	-37.0881	0.308369	-1.52485	-0.741284	0.175517	0.755308	2.90318	24.1385	1.09932	-5.54314	-4.63505	7.90909
4.4	14.3189	14.9807	15.1961		2.66158	2.70676	2.72104	#NUM!	-27.8061	0.231194	-1.56279	-0.775727	0.116326	0.79798	2.86914	23.8555	0.728594	-5.77913	-4.80918	8
4.45	14.8651	15.2405	15.4444		2.69902	2.72396	2.73725	#NUM!	-18.2921	0.15209	-1.60242	-0.814813	0.0553056	0.883211	2.83367	23.5606	0.346399	-6.02406	-5.01192	8.09091
4.5	15.4381	15.5019	15.6941		2.73684	2.74096	2.75328	#NUM!	-8.53352	0.0709519	-1.64427	-0.857147	0.007521	0.988889	2.79669	23.2531	0.0471068	-6.28032	-5.22626	8.18182
4.55	16.0402	15.7649	15.9454		2.7751	2.75779	2.76917	#NUM!	1.48381	-0.0123371	-1.68814	-0.899578	0.0723163	0.0282811	2.75814	22.9325	0.452944	-6.54668	-5.44685	8.27273
4.6	16.6734	16.0294	16.1982		2.81381	2.77442	2.7849	#NUM!	11.77	-0.0978616	-1.73423	-0.948531	0.139145	0.330941	2.71795	22.5984	0.871518	-6.82501	-5.7047	8.36364
4.65	17.3402	16.2955	16.4525		2.85303	2.79089	2.80048	#NUM!	22.3417	-0.18576	-1.78299	-1.0013	0.208085	0.443497	2.67605	22.25	1.30331	-7.11715	-5.98113	8.45455
4.7	18.0433	16.5632	16.7083		2.89277	2.80718	2.81591	#NUM!	33.2143	-0.27616	-1.83436	-1.0543	0.279238	0.494459	2.63235	21.8867	1.74897	-7.42312	-6.25819	8.54545
4.75	18.7857	16.8324	16.9656		2.9331	2.82331	2.83119	#NUM!	44.4039	-0.369196	-1.88842	-1.11474	0.352745	0.522775	2.58677	21.5077	2.20937	-7.74297	-6.57599	8.63636
4.8	19.5708	17.1031	17.2245		2.97404	2.83926	2.84633	#NUM!	55.9267	-0.465002	-1.94583	-1.17992	0.428746	0.5405	2.53923	21.1124	2.68539	-8.08072	-6.92373	8.72727
4.85	20.4022	17.3755	17.4848		3.01564	2.85506	2.86133	#NUM!	67.8068	-0.56378	-2.00641	-1.24914	0.507277	0.552608	2.48958	20.6996	3.17726	-8.43534	-7.29268	8.81818
4.9	21.2841	17.6493	17.7467		3.05796	2.8707	2.8762	#NUM!	80.0581	-0.665643	-2.07075	-1.32641	0.588589	0.561204	2.43777	20.2689	3.68655	-8.80999	-7.70349	8.90909
4.95	22.2212	17.9248	18.01		3.10105	2.88619	2.89093	#NUM!	92.712	-0.770854	-2.13905	19.1502	0.672742	0.567652	2.38362	19.8186	4.21363	-9.20569	128.138	9
5	23.2187	18.2018	18.2749		3.14496	2.90152	2.90553	#NUM!	105.785	-0.879549	-0.155728	-0.432132	0.759968	0.57255	2.32705	19.3483	4.75996	4.00377	-1.85974	9.09091

## Sheet: Qst_Fe-PCN-224_HT
	Units = K		1/T1	1/T2	1/T3	1/T4
T1	195		0.00512821	0.00442478	0.003663	0.0033557							n min	0.05				-∆H	18.5
T2	226												Interval	0.05				-∆S	69.7
T3	273																	-∆S corrected	70.8
T4	298																	Accesible sites	0.55	mmol/g
																		Low-loading	0.45	mmol/g
n (mmol/g)	P (T1)	P (T2)	P (T3)	P (T4)	lnP (T1)	lnP (T2)	lnP (T3)	lnp (T4)	dlnP/dT	∆H	1st derivative	2nd derivative	Qst std error	R2	Y-int	∆S	∆S error	1st derivative	2nd derivative	Surface coverage	Ln SC	∆S corrected
0.05	0.000584688	0.00870194	0.0626969	0.158443	-7.44443	-4.74421	-2.76944	-1.84236	-2691.11	22.3753			2.98515	0.987432	9.0336	75.1099	13.2713			0.0909091	-2.3979	77.5078
0.1	0.00173495	0.0213757	0.139367	0.33594	-6.35678	-3.8455	-1.97064	-1.09082	-2554.69	21.241	-21.3981		2.65593	0.988687	9.09751	75.6413	11.8077	-2.43214		0.181818	-1.70475	77.346
0.15	0.0034802	0.0375739	0.22352	0.518814	-5.66067	-3.28145	-1.49825	-0.65621	-2433.75	20.2355	-19.5051	28.9469	2.4945	0.988917	9.00435	74.8667	11.09	-22.6428	-327.939	0.272727	-1.29928	76.166
0.2	0.00598884	0.0576373	0.31332	0.705618	-5.11786	-2.85359	-1.16053	-0.348681	-2320.1	19.2905	-18.5034	17.5739	2.38651	0.988778	8.82518	73.377	10.6099	-35.2261	-226.246	0.363636	-1.0116	74.3886
0.25	0.00953185	0.0820377	0.40765	0.896003	-4.65312	-2.50058	-0.897346	-0.109812	-2211.21	18.3851	-17.7477	15.174	2.28849	0.988546	8.58068	71.3441	10.1741	-45.2674	-184.609	0.454545	-0.788457	72.1325
0.3	0.0145071	0.111251	0.505709	1.08993	-4.23312	-2.19597	-0.681794	0.0861135	-2106.64	17.5157	-16.986	16.379	2.1756	0.988423	8.28074	68.8503	9.67225	-53.687	-147.59	0.545455	-0.606136	69.4564
0.35	0.0214581	0.145664	0.606892	1.28749	-3.84165	-1.92645	-0.499404	0.252695	-2006.92	16.6865	-16.1098	18.9792	2.0343	0.98857	7.93498	65.9754	9.04405	-60.0264	-93.2136	0.636364	-0.451985	66.4274
0.4	0.0310341	0.185505	0.71074	1.48881	-3.47267	-1.68467	-0.341449	0.397977	-1912.89	15.9047	-15.0881	21.6781	1.86473	0.989054	7.5588	62.8476	8.29017	-63.0083	-12.9128	0.727273	-0.318454	63.1661
0.45	0.0438098	0.2308	0.816915	1.69408	-3.1279	-1.4662	-0.20222	0.52714	-1825.45	15.1777	-13.942	23.6188	1.68383	0.989771	7.17716	59.6745	7.48592	-61.3177	81.4947	0.818182	-0.200671	59.8752
0.5	0.0599736	0.281385	0.925176	1.90348	-2.81385	-1.26803	-0.0777713	0.643684	-1745.21	14.5105	-12.7262	24.4044	1.52108	0.990451	6.82132	56.7158	6.76237	-54.8589	160.245	0.909091	-0.0953102	56.8112
0.55	0.0791379	0.336955	1.03536	2.11722	-2.53656	-1.08781	0.0347492	0.750104	-1672.39	13.9051	-11.5016	24.0398	1.40346	0.990793	6.51737	54.1886	6.23948	-45.2932	198.349	1	-2.22045e-16	54.1886
0.6	0.100523	0.397132	1.14738	2.33553	-2.29737	-0.923487	0.137481	0.848239	-1606.87	13.3604	-10.3222	22.7536	1.34216	0.990611	6.27657	52.1865	5.96692	-35.0239	194.957	1.09091	0.0870114	52.0995
0.65	0.123325	0.461527	1.26119	2.55863	-2.09293	-0.773215	0.232056	0.939472	-1548.24	12.8729	-9.22621	20.8884	1.33285	0.989851	6.09613	50.6863	5.92554	-25.7974	167.415	1.18182	0.167054	50.5192
0.7	0.14694	0.529787	1.3768	2.78676	-1.91773	-0.63528	0.319762	1.02488	-1495.91	12.4377	-8.23339	18.7609	1.36388	0.988537	5.9663	49.6068	6.06351	-18.2825	133.515	1.27273	0.241162	49.3656
0.75	0.170983	0.601617	1.49424	3.02019	-1.76619	-0.508134	0.401618	1.10532	-1449.22	12.0495	-7.35012	16.5889	1.42322	0.986722	5.87624	48.858	6.32731	-12.4459	102.857	1.36364	0.310155	48.5479
0.8	0.195235	0.676789	1.61359	3.25919	-1.63355	-0.390396	0.478462	1.18148	-1407.51	11.7027	-6.57449	14.5208	1.50106	0.984468	5.81661	48.3622	6.67338	-7.9968	78.3019	1.45455	0.374693	47.9875
0.85	0.219581	0.755141	1.73494	3.50402	-1.51603	-0.280851	0.550973	1.25391	-1370.14	11.3921	-5.89804	12.646	1.59035	0.981837	5.78006	48.0583	7.07035	-4.61575	59.6902	1.54545	0.435318	47.623
0.9	0.243969	0.836568	1.85841	3.755	-1.41071	-0.178447	0.619721	1.32309	-1336.57	11.1129	-5.30989	10.9802	1.68624	0.978892	5.76109	47.9006	7.49663	-2.02779	45.8904	1.63636	0.492476	47.4081
0.95	0.26838	0.921017	1.98415	4.01243	-1.31535	-0.0822768	0.685191	1.3894	-1306.28	10.8611	-4.80002	9.52711	1.78552	0.975688	5.75567	47.8555	7.93801	-0.0267129	35.6589	1.72727	0.546544	47.309
1	0.292816	1.00848	2.1123	4.27664	-1.22821	0.00844425	0.747777	1.45317	-1278.84	10.6329	-4.35718	8.27274	1.88617	0.972275	5.76077	47.8979	8.38547	1.53811	28.083	1.81818	0.597837	47.3001
1.05	0.317293	1.09898	2.24305	4.54799	-1.14793	0.0943825	0.807837	1.51469	-1253.88	10.4254	-3.97274	7.19394	1.9868	0.968698	5.77417	48.0094	8.83284	2.78158	22.4833	1.90909	0.646627	47.3627
1.1	0.341828	1.19259	2.37658	4.82685	-1.07345	0.176127	0.865662	1.57419	-1231.06	10.2356	-3.63778	6.27637	2.08673	0.964992	5.79423	48.1761	9.27713	3.78644	18.3034	2	0.693147	47.483
1.15	0.366445	1.28938	2.51312	5.1136	-1.00391	0.254161	0.921525	1.6319	-1210.13	10.0616	-3.34511	5.4788	2.18536	0.961192	5.81971	48.388	9.71561	4.61192	15.139	2.09091	0.737599	47.6504
1.2	0.391169	1.38948	2.6529	5.40866	-0.938616	0.32893	0.975653	1.688	-1190.83	9.90113	-3.0899	4.79529	2.28252	0.957321	5.8497	48.6373	10.1476	5.30034	12.7267	2.18182	0.780159	47.8571
1.25	0.416025	1.49303	2.79616	5.71249	-0.87701	0.400808	1.02825	1.74266	-1172.96	9.7526	-2.86558	4.21925	2.37813	0.953402	5.88346	48.918	10.5726	5.88459	10.9317	2.27273	0.820981	48.0971
1.3	0.441039	1.60018	2.94317	6.02554	-0.818622	0.470116	1.07949	1.79601	-1156.36	9.61457	-2.66798	3.71538	2.47212	0.949454	5.92047	49.2258	10.9905	6.39352	9.60058	2.36364	0.860201	48.3656
1.35	0.466236	1.71112	3.09425	6.34832	-0.763063	0.537148	1.12955	1.84819	-1140.87	9.4858	-2.49404	3.2745	2.56456	0.945491	5.96036	49.5574	11.4014	6.84465	8.5787	2.45455	0.897942	48.6594
1.4	0.491642	1.82606	3.2497	6.68138	-0.710004	0.602161	1.17856	1.89932	-1126.37	9.36517	-2.34053	2.89715	2.65555	0.941526	6.00279	49.9102	11.806	7.25138	7.84252	2.54545	0.934309	48.9759
1.45	0.517282	1.94523	3.40988	7.02529	-0.659167	0.66538	1.22668	1.94952	-1112.72	9.25174	-2.20432	2.57145	2.7452	0.937569	6.04757	50.2825	12.2045	7.6289	7.32484	2.63636	0.969401	49.3131
1.5	0.543182	2.06888	3.57519	7.38067	-0.610311	0.727007	1.27402	1.99886	-1099.85	9.14474	-2.08338	2.27777	2.8336	0.93363	6.09455	50.6731	12.5976	7.98387	6.95643	2.72727	1.0033	49.6698
1.55	0.569368	2.19729	3.74603	7.74818	-0.563228	0.787225	1.3207	2.04746	-1087.67	9.04341	-1.97655	2.01753	2.92089	0.929717	6.14359	51.0809	12.9856	8.32455	6.75736	2.81818	1.03609	50.0448
1.6	0.595864	2.33078	3.92287	8.12853	-0.517743	0.846203	1.36682	2.09538	-1076.08	8.94708	-1.88163	1.7938	3.00724	0.925834	6.19467	51.5056	13.3695	8.6596	6.68303	2.90909	1.06784	50.4377
1.65	0.622697	2.46968	4.10623	8.52249	-0.473695	0.904089	1.41251	2.14271	-1065.04	8.85524	-1.79717	1.59613	3.09273	0.921991	6.24774	51.9469	13.7496	8.99285	6.70212	3	1.09861	50.8483
1.7	0.649892	2.61437	4.29666	8.93089	-0.430949	0.961023	1.45784	2.18952	-1054.47	8.76736	-1.72202	1.4138	3.17752	0.91819	6.30283	52.4049	14.1265	9.32982	6.81929	3.09091	1.12847	51.2764
1.75	0.677478	2.76525	4.49481	9.35462	-0.389378	1.01713	1.50292	2.23587	-1044.33	8.68304	-1.65579	1.24284	3.26167	0.914441	6.35996	52.8799	14.5007	9.67478	7.01977	3.18182	1.15745	51.7224
1.8	0.70548	2.9228	4.70135	9.79466	-0.348877	1.07254	1.54785	2.28184	-1034.55	8.60178	-1.59773	1.09738	3.3454	0.910744	6.41919	53.3723	14.8729	10.0318	7.30817	3.27273	1.18562	52.1867
1.85	0.733928	3.0875	4.91708	10.252	-0.309344	1.12736	1.59271	2.32747	-1025.11	8.52327	-1.54605	0.968159	3.42875	0.907109	6.48061	53.883	15.2435	10.4056	7.6843	3.36364	1.21302	52.67
1.9	0.762849	3.25992	5.14286	10.7279	-0.270695	1.1817	1.63761	2.37285	-1015.96	8.44718	-1.50092	0.835033	3.51188	0.903538	6.54434	54.4129	15.613	10.8002	8.13703	3.45455	1.23969	53.1732
1.95	0.792274	3.44067	5.37969	11.2235	-0.232848	1.23567	1.68263	2.41801	-1007.06	8.37318	-1.46255	0.716158	3.59487	0.90004	6.61051	54.9631	15.982	11.2193	8.67288	3.54545	1.26567	53.6974
2	0.822234	3.63044	5.62867	11.7401	-0.19573	1.28935	1.72787	2.46301	-998.367	8.30093	-1.4293	0.623256	3.67785	0.896619	6.67927	55.5348	16.3509	11.6675	9.31017	3.63636	1.29098	54.2438
2.05	0.852761	3.82999	5.89108	12.2793	-0.159276	1.34286	1.77344	2.50791	-989.867	8.23025	-1.40022	0.523716	3.76089	0.893284	6.75083	56.1298	16.72	12.1503	10.044	3.72727	1.31568	54.8141
2.1	0.883889	4.04016	6.16837	12.8427	-0.123424	1.39628	1.81943	2.55278	-981.527	8.1609	-1.37693	0.415146	3.84406	0.890043	6.82541	56.7498	17.0898	12.6719	10.8904	3.81818	1.33977	55.4101
2.15	0.915653	4.26194	6.46219	13.432	-0.0881178	1.44972	1.86597	2.59764	-973.306	8.09255	-1.35871	0.32234	3.92752	0.886903	6.90324	57.397	17.4609	13.2394	11.8721	3.90909	1.3633	56.0337
2.2	0.94809	4.49637	6.77449	14.0491	-0.0533058	1.50327	1.91316	2.64256	-965.185	8.02503	-1.3447	0.239261	4.01127	0.883878	6.98464	58.0738	17.8332	13.8591	12.9949	4	1.38629	56.6875
2.25	0.981238	4.7447	7.10748	14.6962	-0.0189402	1.55703	1.96115	2.68759	-957.133	7.95808	-1.33478	0.156254	4.09546	0.880977	7.06993	58.7829	18.2075	14.5388	14.2865	4.09091	1.40877	57.3741
2.3	1.01514	5.00829	7.46381	15.3757	0.0150265	1.61109	2.01007	2.73279	-949.132	7.89155	-1.32907	0.0726049	4.18008	0.878215	7.1595	59.5277	18.5837	15.2878	15.7844	4.18182	1.43075	58.0969
2.35	1.04984	5.28872	7.84655	16.0901	0.0486378	1.66558	2.06007	2.7782	-941.148	7.82518	-1.32752	-0.00547697	4.26521	0.875607	7.2538	60.3117	18.9622	16.1173	17.5395	4.27273	1.45225	58.8594
2.4	1.08538	5.58778	8.25938	16.8424	0.0819302	1.72058	2.11135	2.8239	-933.165	7.7588	-1.32962	-0.0851034	4.35087	0.873174	7.35335	61.1394	19.343	17.0417	19.5698	4.36364	1.47331	59.6661
2.45	1.12181	5.90755	8.70672	17.6358	0.114943	1.77623	2.1641	2.86993	-925.156	7.69221	-1.33603	-0.160107	4.43707	0.870935	7.45876	62.0159	19.7262	18.0743	21.9588	4.45455	1.49393	60.5219
2.5	1.15919	6.25041	9.1939	18.4738	0.147721	1.83265	2.21854	2.91635	-917.097	7.6252	-1.34563	-0.225123	4.52376	0.868919	7.57073	62.9468	20.1116	19.2376	24.8025	4.54545	1.51413	61.4327
2.55	1.19756	6.61913	9.72746	19.3606	0.180286	1.88996	2.27495	2.96324	-908.972	7.55765	-1.35854	-0.295623	4.61088	0.867157	7.69013	63.9396	20.4989	20.5545	28.1739	4.63636	1.53393	62.4057
2.6	1.237	7.01697	10.3155	20.3006	0.212689	1.94833	2.33365	3.01065	-900.757	7.48934	-1.37519	-0.355367	4.69826	0.865686	7.81794	65.0023	20.8874	22.055	32.2646	4.72727	1.55335	63.4489
2.65	1.27755	7.44775	10.9681	21.2989	0.244944	2.00791	2.39499	3.05866	-892.433	7.42013	-1.39408	-0.387546	4.78575	0.864548	7.95539	66.1451	21.2764	23.781	37.2939	4.81818	1.5724	64.5727
2.7	1.3193	7.916	11.6983	22.3613	0.277101	2.06889	2.45944	3.10733	-883.99	7.34994	-1.41395	-0.401343	4.87294	0.863803	8.10396	67.3804	21.664	25.7844	43.4772	4.90909	1.59109	65.7893
2.75	1.36231	8.42713	12.5229	23.4944	0.309182	2.13146	2.52756	3.15676	-875.427	7.27874	-1.43421	-0.383794	4.95932	0.863519	8.26551	68.7236	22.048	28.1287	51.2595	5	1.60944	67.1141
2.8	1.40667	8.98768	13.4639	24.7056	0.341225	2.19585	2.60001	3.20703	-866.741	7.20652	-1.45233	-0.296522	5.04416	0.863778	8.44227	70.1932	22.4252	30.9103	61.2913	5.09091	1.62746	68.5658
2.85	1.45245	9.60561	14.5515	26.0035	0.373252	2.26235	2.67769	3.25823	-857.959	7.1335	-1.46387	-0.10062	5.12633	0.86469	8.63727	71.8146	22.7905	34.2578	74.3992	5.18182	1.64516	70.1694
2.9	1.49975	10.2907	15.8272	27.398	0.405298	2.33124	2.76173	3.31047	-849.135	7.06013	-1.46239	0.268844	5.20418	0.86639	8.85429	73.619	23.1366	38.3502	92.0168	5.27273	1.66255	71.9565
2.95	1.54867	11.0551	17.351	28.9004	0.437396	2.40289	2.85365	3.36386	-840.371	6.98727	-1.43698	#NUM!	5.27513	0.86906	9.09852	75.6496	23.452	43.4595	#NUM!	5.36364	1.67964	73.97
3	1.59932	11.9142	19.212	30.524	0.469579	2.47773	2.95554	3.41851	-831.852	6.91643	#NUM!	#NUM!	5.33534	0.872935	9.37699	77.965	23.7197	#NUM!	#NUM!	5.45455	1.69645	76.2685
3.05					#NUM!	#NUM!	#NUM!	#NUM!	#NUM!	#NUM!	#NUM!	#NUM!	#VALUE!	#VALUE!	#NUM!	#NUM!	#VALUE!	#NUM!	#NUM!	5.54545	1.71298	#NUM!
3.1					#NUM!	#NUM!	#NUM!	#NUM!	#NUM!	#NUM!	#NUM!	#NUM!	#VALUE!	#VALUE!	#NUM!	#NUM!	#VALUE!	#NUM!	#NUM!	5.63636	1.72924	#NUM!
3.15	5.95757	8.99941	9.48497		1.78466	2.19716	2.24971	#NUM!	#NUM!	#NUM!	#NUM!	#NUM!	1.2393	0.816074	3.4603	28.7707	5.50964	#NUM!	#NUM!	5.72727	1.74524	27.0255
3.2	6.1694	9.21928	9.69493		1.8196	2.2213	2.2716	#NUM!	#NUM!	#NUM!	#NUM!	#NUM!	1.20958	0.814804	3.44844	28.672	5.3775	-2.03903	#NUM!	5.81818	1.76099	26.911
3.25	6.38789	9.4408	9.90646		1.8544	2.24504	2.29319	#NUM!	#NUM!	#NUM!	#NUM!	#NUM!	1.17871	0.813632	3.43578	28.5668	5.24029	-2.17351	-2.69391	5.90909	1.77649	26.7903
3.3	6.61335	9.66397	10.1195		1.88909	2.2684	2.31446	#NUM!	#NUM!	#NUM!	#NUM!	#NUM!	1.14672	0.81255	3.4223	28.4547	5.09806	-2.30842	-2.72551	6	1.79176	26.6629
3.35	6.84611	9.88878	10.3342		1.92368	2.2914	2.33546	#NUM!	#NUM!	#NUM!	#NUM!	#NUM!	1.11354	0.811587	3.40802	28.3359	4.95054	-2.44606	-2.82584	6.09091	1.8068	26.5292
3.4	7.0865	10.1152	10.5504		1.95819	2.31404	2.35616	#NUM!	#NUM!	#NUM!	#NUM!	#NUM!	1.07919	0.810728	3.39288	28.2101	4.79784	-2.59101	-2.90782	6.18182	1.82161	26.3885
3.45	7.33491	10.3433	10.7681		1.99265	2.33634	2.37659	#NUM!	#NUM!	#NUM!	#NUM!	#NUM!	1.0437	0.809966	3.37685	28.0768	4.64008	-2.73684	-2.94607	6.27273	1.83621	26.2406
3.5	7.59173	10.573	10.9874		2.02706	2.3583	2.39675	#NUM!	#NUM!	#NUM!	#NUM!	#NUM!	1.00698	0.809338	3.35996	27.9364	4.47683	-2.88561	-3.00855	6.36364	1.8506	26.0858
3.55	7.85737	10.8043	11.2082		2.06145	2.37994	2.41665	#NUM!	#NUM!	#NUM!	#NUM!	#NUM!	0.96905	0.808838	3.34215	27.7883	4.30818	-3.0377	-3.08002	6.45455	1.86478	25.9235
3.6	8.13229	11.0373	11.4306		2.09584	2.40128	2.43629	#NUM!	#NUM!	#NUM!	#NUM!	#NUM!	0.929907	0.808475	3.32342	27.6326	4.13416	-3.19361	-3.17754	6.54545	1.87877	25.7538
3.65	8.41696	11.2718	11.6545		2.13025	2.4223	2.45569	#NUM!	#NUM!	#NUM!	#NUM!	#NUM!	0.88945	0.808287	3.30374	27.4689	3.9543	-3.35545	-3.2547	6.63636	1.89256	25.5764
3.7	8.71189	11.508	11.8799		2.16469	2.44304	2.47485	#NUM!	#NUM!	#NUM!	#NUM!	#NUM!	0.847774	0.808251	3.28307	27.2971	3.76901	-3.51908	-3.31561	6.72727	1.90617	25.3909
3.75	9.01764	11.7457	12.1069		2.19918	2.46349	2.49378	#NUM!	#NUM!	#NUM!	#NUM!	#NUM!	0.804708	0.808453	3.26141	27.117	3.57755	-3.68701	-3.42625	6.81818	1.91959	25.1974
3.8	9.33479	11.9851	12.3354		2.23375	2.48366	2.51247	#NUM!	#NUM!	#NUM!	#NUM!	#NUM!	0.760367	0.808862	3.23872	26.9284	3.38042	-3.86171	-3.52284	6.90909	1.93284	24.9955
3.85	9.66398	12.226	12.5654		2.26841	2.50356	2.53095	#NUM!	#NUM!	#NUM!	#NUM!	#NUM!	0.714608	0.809565	3.21497	26.7308	3.17698	-4.0393	-3.58687	7	1.94591	24.7849
3.9	10.0059	12.4686	12.797		2.30317	2.52321	2.54921	#NUM!	#NUM!	#NUM!	#NUM!	#NUM!	0.667477	0.810591	3.19014	26.5244	2.96745	-4.2204	-3.71009	7.09091	1.95881	24.5656
3.95	10.3612	12.7127	13.0301		2.33807	2.5426	2.56726	#NUM!	#NUM!	#NUM!	#NUM!	#NUM!	0.618886	0.812038	3.16421	26.3088	2.75143	-4.41031	-3.86966	7.18182	1.97155	24.3373
4	10.7308	12.9584	13.2647		2.37312	2.56174	2.58511	#NUM!	#NUM!	#NUM!	#NUM!	#NUM!	0.568805	0.813989	3.1371	26.0834	2.52878	-4.60736	-3.98722	7.27273	1.98413	24.0993
4.05	11.1155	13.2057	13.5008		2.40834	2.58065	2.60275	#NUM!	#NUM!	#NUM!	#NUM!	#NUM!	0.51721	0.816583	3.10879	25.8481	2.2994	-4.80903	-4.07249	7.36364	1.99655	23.8515
4.1	11.5162	13.4545	13.7384		2.44375	2.59931	2.62019	#NUM!	#NUM!	#NUM!	#NUM!	#NUM!	0.464014	0.820056	3.07926	25.6025	2.0629	-5.01461	-4.18513	7.45455	2.00882	23.5937
4.15	11.9339	13.705	13.9776		2.47938	2.61776	2.63746	#NUM!	#NUM!	#NUM!	#NUM!	#NUM!	0.409241	0.824687	3.04848	25.3466	1.8194	-5.22754	-4.36327	7.54545	2.02095	23.3257
4.2	12.3697	13.957	14.2183		2.51525	2.63598	2.65453	#NUM!	#NUM!	#NUM!	#NUM!	#NUM!	0.352762	0.831006	3.01639	25.0798	1.5683	-5.45094	-4.53383	7.63636	2.03292	23.0468
4.25	12.8248	14.2105	14.4605		2.55138	2.65398	2.67142	#NUM!	#NUM!	#NUM!	#NUM!	#NUM!	0.294514	0.839839	2.98292	24.8015	1.30934	-5.68092	-4.67185	7.72727	2.04476	22.7568
4.3	13.3004	14.4657	14.7042		2.58779	2.67178	2.68813	#NUM!	#NUM!	#NUM!	#NUM!	#NUM!	0.234552	0.85255	2.94806	24.5117	1.04276	-5.91812	-4.84971	7.81818	2.05645	22.4552
4.35	13.7979	14.7224	14.9494		2.62452	2.68937	2.70467	#NUM!	#NUM!	#NUM!	#NUM!	#NUM!	0.172714	0.872041	2.91174	24.2097	0.767848	-6.1659	-5.0505	7.90909	2.06801	22.1417
4.4	14.3189	14.9807	15.1961		2.66158	2.70676	2.72104	#NUM!	#NUM!	#NUM!	#NUM!	#NUM!	0.108957	0.904285	2.8739	23.8951	0.484398	-6.42317	-5.23861	8	2.07944	21.8156
4.45	14.8651	15.2405	15.4444		2.69902	2.72396	2.73725	#NUM!	#NUM!	#NUM!	#NUM!	#NUM!	0.0431337	0.961635	2.83449	23.5674	0.191763	-6.68976	-5.45124	8.09091	2.09074	21.4766
4.5	15.4381	15.5019	15.6941		2.73684	2.74096	2.75328	#NUM!	#NUM!	#NUM!	#NUM!	#NUM!	0.0247004	0.935277	2.79344	23.2261	0.109812	-6.9683	-5.68668	8.18182	2.10191	21.1242
4.55	16.0402	15.7649	15.9454		2.7751	2.75779	2.76917	#NUM!	#NUM!	#NUM!	#NUM!	#NUM!	0.0947406	0.0993113	2.75068	22.8706	0.421196	-7.25842	-5.92868	8.27273	2.11296	20.7576
4.6	16.6734	16.0294	16.1982		2.81381	2.77442	2.7849	#NUM!	#NUM!	#NUM!	#NUM!	#NUM!	0.167057	0.479177	2.70615	22.5003	0.742698	-7.56117	-6.20173	8.36364	2.12389	20.3764
4.65	17.3402	16.2955	16.4525		2.85303	2.79089	2.80048	#NUM!	#NUM!	#NUM!	#NUM!	#NUM!	0.241724	0.594434	2.65974	22.1144	1.07465	-7.8786	-6.50148	8.45455	2.1347	19.9797
4.7	18.0433	16.5632	16.7083		2.89277	2.80718	2.81591	#NUM!	#NUM!	#NUM!	#NUM!	#NUM!	0.318855	0.644017	2.61139	21.7124	1.41756	-8.21131	-6.81087	8.54545	2.1454	19.567
4.75	18.7857	16.8324	16.9656		2.9331	2.82331	2.83119	#NUM!	#NUM!	#NUM!	#NUM!	#NUM!	0.398611	0.670896	2.56098	21.2933	1.77213	-8.55969	-7.15284	8.63636	2.15598	19.1373
4.8	19.5708	17.1031	17.2245		2.97404	2.83926	2.84633	#NUM!	#NUM!	#NUM!	#NUM!	#NUM!	0.481151	0.687476	2.50844	20.8564	2.13909	-8.9266	-7.52404	8.72727	2.16645	18.69
4.85	20.4022	17.3755	17.4848		3.01564	2.85506	2.86133	#NUM!	#NUM!	#NUM!	#NUM!	#NUM!	0.566485	0.698693	2.45362	20.4006	2.51846	-9.31209	-7.92736	8.81818	2.17682	18.2238
4.9	21.2841	17.6493	17.7467		3.05796	2.8707	2.8762	#NUM!	#NUM!	#NUM!	#NUM!	#NUM!	0.654925	0.706603	2.39644	19.9252	2.91165	-9.71933	-8.37079	8.90909	2.18707	17.7381
4.95	22.2212	17.9248	18.01		3.10105	2.88619	2.89093	#NUM!	#NUM!	#NUM!	#NUM!	#NUM!	0.746498	0.712506	2.33673	19.4287	3.31876	-10.1492	136.443	9	2.19722	17.2315
5	23.2187	18.2018	18.2749		3.14496	2.90152	2.90553	#NUM!	#NUM!	#NUM!	#NUM!	#NUM!	0.841489	0.716975	2.27438	18.9103		3.92499	-2.05034	9.09091	2.20727	16.703

## Sheet: Qst_Co-PCN-224
	Units = K		1/T1	1/T2	1/T3	1/T4
T1	113		0.00884956	0.0070922	0.00641026	0.00512821							n min	0.05				-∆H	15.2
T2	141												Interval	0.05				-∆S	59.6
T3	156																	-∆S corrected	60.5
T4	195																	Accesible sites	0.7	mmol/g
																		Low-loading	0.7	mmol/g
n (mmol/g)	P (T1)	P (T2)	P (T3)	P (T4)	lnP (T1)	lnP (T2)	lnP (T3)	lnp (T4)	dlnP/dT	∆H	1st derivative	2nd derivative	Qst std error	R2	Y-int	∆S	∆S error	1st derivative	2nd derivative	Surface coverage
0.05	1.55711e-05	0.000133761	0.000643264	0.0123232	-11.0701	-8.91946	-7.34896	-4.39627	-1782.56	14.8211			1.95983	0.974783	1.8061	15.0168	222.06			0.0714286
0.1	3.31524e-05	0.000440899	0.001899	0.0278165	-10.3144	-7.72669	-6.26643	-3.58213	-1804.05	14.9997	3.8721		1.21462	0.991956	3.98468	33.1306	207.345	297.054		0.142857
0.15	4.93191e-05	0.000880079	0.00357046	0.0448077	-9.9172	-7.0355	-5.63506	-3.10538	-1829.13	15.2083	3.65625	-12.3158	0.751488	0.997286	5.37882	44.7222	199.849	197.619	-1551.03	0.214286
0.2	6.51656e-05	0.00142509	0.00557607	0.062868	-9.63858	-6.55352	-5.18927	-2.76672	-1848.02	15.3654	2.64052	-19.5741	0.444972	0.999127	6.36147	52.8925	194.755	141.951	-921.04	0.285714
0.25	8.1474e-05	0.00205349	0.00786217	0.0817807	-9.41523	-6.18821	-4.84569	-2.50371	-1860.89	15.4723	1.69884	-17.8362	0.24042	0.99976	7.0861	58.9174	190.79	105.515	-626.778	0.357143
0.3	9.88966e-05	0.00274795	0.0103885	0.101413	-9.22144	-5.8969	-4.56706	-2.28855	-1868.45	15.5352	0.856897	-16.2633	0.105881	0.999955	7.63052	63.444	187.435	79.2736	-464.861	0.428571
0.35	0.000118105	0.00349817	0.0131239	0.121675	-9.04394	-5.65552	-4.33332	-2.1064	-1871.19	15.558	0.0725115	-15.5008	0.0194933	0.999999	8.03954	66.8447	184.421	59.0289	-368.089	0.5
0.4	0.000139895	0.00430085	0.0160439	0.142501	-8.87462	-5.44894	-4.13243	-1.94841	-1869.32	15.5425	-0.693183	-15.4078	0.0341279	0.999996	8.34047	69.3469	181.587	42.4647	-308.681	0.571429
0.45	0.000165294	0.00515829	0.0191305	0.163841	-8.70778	-5.26715	-3.95647	-1.80886	-1862.86	15.4887	-1.46827	-15.7433	0.0651307	0.999984	8.55027	71.0912	178.814	28.1609	-272.381	0.642857
0.5	0.000195675	0.00607649	0.022371	0.185655	-8.53906	-5.10333	-3.79999	-1.68387	-1851.67	15.3957	-2.26751	-16.1806	0.0796075	0.999976	8.67917	72.163	176.016	15.2267	-249.447	0.714286
0.55	0.000232884	0.00706342	0.0257574	0.207913	-8.36497	-4.95283	-3.65903	-1.57064	-1835.58	15.262	-3.08633	-16.2155	0.0806572	0.999975	8.7334	72.6139	173.122	3.21622	-230.63	0.785714
0.6	0.00027932	0.00812765	0.0292858	0.230587	-8.18315	-4.81248	-3.53065	-1.46713	-1814.55	15.087	-3.88907	-15.1516	0.0696517	0.999981	8.71785	72.4846	170.083	-7.83636	-206.014	0.857143
0.65	0.000337854	0.00927726	0.0329552	0.253656	-7.9929	-4.68019	-3.41261	-1.37178	-1788.81	14.8731	-4.6015	-12.3838	0.0476986	0.999991	8.63915	71.8302	166.885	-17.3852	-167.312	0.928571
0.7	0.000411424	0.010519	0.0367674	0.277102	-7.79589	-4.55457	-3.30314	-1.28337	-1759.2	14.6269	-5.12745	-7.92226	0.0169413	0.999999	8.50876	70.7461	163.562	-24.5676	-113.358	1
0.75	0.00050234	0.0118581	0.0407256	0.300907	-7.59623	-4.43474	-3.2009	-1.20095	-1727.14	14.3603	-5.39372	-2.66758	0.018725	0.999998	8.34367	69.3735	160.194	-28.721	-52.9262	1.07143
0.8	0.000611701	0.0132975	0.0448347	0.325059	-7.39927	-4.32018	-3.10477	-1.12375	-1694.33	14.0875	-5.39421	2.04684	0.0547728	0.999986	8.16333	67.874	156.888	-29.8602	0.381492	1.14286
0.85	0.000739371	0.014839	0.0490998	0.349545	-7.20971	-4.2105	-3.0139	-1.05112	-1662.26	13.8209	-5.18904	5.30612	0.0872204	0.999963	7.98454	66.3875	153.739	-28.6828	37.2273	1.21429
0.9	0.000884452	0.0164824	0.0535266	0.374354	-7.03054	-4.10546	-2.92758	-0.982553	-1631.92	13.5686	-4.86359	6.987	0.114003	0.999933	7.81835	65.0057	150.806	-26.1375	56.6253	1.28571
0.95	0.00104581	0.0182272	0.0581208	0.399477	-6.86296	-4.00484	-2.84523	-0.917599	-1603.77	13.3345	-4.49034	7.47994	0.134523	0.999903	7.67018	63.7737	148.112	-23.0203	62.9725	1.35714
1	0.00122237	0.0200718	0.0628874	0.424905	-6.70696	-3.90844	-2.76641	-0.85589	-1577.92	13.1196	-4.1156	7.26698	0.149299	0.999876	7.54148	62.7037	145.658	-19.8402	61.5873	1.42857
1.05	0.00141325	0.0220146	0.0678314	0.450631	-6.56186	-3.81605	-2.69073	-0.797106	-1554.27	12.923	-3.76364	6.71823	0.159268	0.999853	7.43156	61.7897	143.428	-16.8616	56.522	1.5
1.1	0.00161776	0.0240538	0.0729567	0.476647	-6.42671	-3.72746	-2.61789	-0.740979	-1532.65	12.7432	-3.44378	6.05887	0.165454	0.999837	7.33869	61.0175	141.405	-14.188	50.2088	1.57143
1.15	0.00183534	0.0261879	0.0782667	0.502948	-6.30053	-3.64246	-2.54763	-0.687268	-1512.85	12.5786	-3.15776	5.39341	0.168736	0.999825	7.26092	60.3709	139.567	-11.8407	43.7813	1.64286
1.2	0.00206556	0.0284153	0.0837641	0.529528	-6.18235	-3.56083	-2.47975	-0.635769	-1494.67	12.4274	-2.90444	4.77367	0.169886	0.999818	7.19628	59.8334	137.897	-9.80989	37.7948	1.71429
1.25	0.0023081	0.0307346	0.0894507	0.556381	-6.07133	-3.48237	-2.41407	-0.586302	-1477.92	12.2882	-2.68039	4.22419	0.169506	0.999814	7.14293	59.3899	136.375	-8.0612	32.5281	1.78571
1.3	0.00256266	0.0331447	0.0953277	0.583504	-5.96671	-3.40687	-2.35043	-0.538704	-1462.43	12.1594	-2.48202	3.73917	0.16802	0.999813	7.09932	59.0273	134.988	-6.55708	27.917	1.85714
1.35	0.00282902	0.0356445	0.101396	0.610891	-5.86782	-3.33416	-2.28872	-0.492837	-1448.07	12.04	-2.30647	3.3158	0.165776	0.999814	7.06407	58.7342	133.722	-5.26949	23.9269	1.92857
1.4	0.00310701	0.0382333	0.107655	0.638539	-5.77409	-3.26405	-2.22882	-0.448573	-1434.69	11.9288	-2.15044	2.95165	0.162983	0.999817	7.03595	58.5004	132.565	-4.16439	20.5332	2
1.45	0.00339645	0.0409103	0.114105	0.666444	-5.68502	-3.19637	-2.17064	-0.405799	-1422.2	11.8249	-2.01131	2.63581	0.159827	0.999821	7.01398	58.3177	131.506	-3.21617	17.6348	2.07143
1.5	0.00369722	0.0436749	0.120744	0.694602	-5.60017	-3.13098	-2.11408	-0.364416	-1410.5	11.7276	-1.88686	2.3623	0.156399	0.999826	6.99726	58.1788	130.538	-2.40091	15.1729	2.14286
1.55	0.0040092	0.0465265	0.127573	0.723011	-5.51916	-3.06773	-2.05907	-0.324331	-1399.51	11.6362	-1.77508	2.125	0.152831	0.999831	6.9851	58.0777	129.652	-1.69888	13.0679	2.21429
1.6	0.0043323	0.0494649	0.134589	0.751669	-5.44166	-3.00649	-2.00553	-0.285459	-1389.15	11.5501	-1.67435	1.91762	0.149123	0.999837	6.97683	58.0089	128.842	-1.09413	11.2593	2.28571
1.65	0.00466641	0.0524896	0.141792	0.780571	-5.36737	-2.94714	-1.95339	-0.24773	-1379.37	11.4688	-1.58331	1.73564	0.145344	0.999843	6.97195	57.9682	128.102	-0.572944	9.70059	2.35714
1.7	0.00501148	0.0556004	0.149179	0.809716	-5.29602	-2.88956	-1.90261	-0.211072	-1370.11	11.3918	-1.50079	1.57724	0.141489	0.999849	6.96994	57.9516	127.426	-0.124069	8.39255	2.42857
1.75	0.00536744	0.0587971	0.15675	0.839102	-5.2274	-2.83366	-1.8531	-0.175423	-1361.32	11.3187	-1.42559	1.43834	0.137596	0.999856	6.97045	57.9558	126.809	0.266312	7.26811	2.5
1.8	0.00573422	0.0620796	0.164503	0.868726	-5.1613	-2.77934	-1.80483	-0.140728	-1352.96	11.2492	-1.35696	1.31421	0.133658	0.999863	6.97314	57.9782	126.249	0.602742	6.27015	2.57143
1.85	0.00611178	0.0654477	0.172436	0.898587	-5.09754	-2.7265	-1.75773	-0.106932	-1345	11.183	-1.29417	1.20479	0.129679	0.999869	6.9777	58.0161	125.74	0.893327	5.42493	2.64286
1.9	0.00650008	0.0689014	0.180548	0.928682	-5.03594	-2.67508	-1.71176	-0.0739889	-1337.4	11.1198	-1.23648	1.10837	0.125664	0.999876	6.98389	58.0675	125.28	1.14523	4.71117	2.71429
1.95	0.00689907	0.0724406	0.188837	0.959011	-4.97637	-2.62499	-1.66687	-0.0418527	-1330.13	11.0594	-1.18333	1.02148	0.121607	0.999883	6.99148	58.1306	124.866	1.36444	4.09599	2.78571
2	0.00730873	0.0760654	0.197303	0.989571	-4.91869	-2.57616	-1.62301	-0.0104838	-1323.17	11.0015	-1.13433	0.94414	0.117524	0.99989	7.0003	58.204	124.494	1.55483	3.55101	2.85714
2.05	0.00772903	0.0797757	0.205944	1.02036	-4.86277	-2.52854	-1.58015	0.0201555	-1316.49	10.9459	-1.08892	0.875745	0.113408	0.999897	7.01018	58.2861	124.163	1.71955	3.06738	2.92857
2.1	0.00815994	0.0835717	0.214759	1.05138	-4.80852	-2.48205	-1.53824	0.0501036	-1310.07	10.8926	-1.04676	0.812191	0.109255	0.999903	7.02098	58.3759	123.87	1.86157	2.65758	3
2.15	0.00860145	0.0874534	0.223746	1.08263	-4.75582	-2.43665	-1.49724	0.0793933	-1303.9	10.8413	-1.0077	0.75499	0.105057	0.99991	7.03257	58.4723	123.614	1.9853	2.32036	3.07143
2.2	0.00905354	0.0914208	0.232906	1.1141	-4.7046	-2.39228	-1.45712	0.108047	-1297.95	10.7918	-0.971257	0.704706	0.100844	0.999917	7.04486	58.5745	123.391	2.09361	2.00798	3.14286
2.25	0.0095162	0.0954743	0.242237	1.1458	-4.65476	-2.3489	-1.41784	0.136103	-1292.22	10.7441	-0.937229	0.658739	0.0965903	0.999923	7.05775	58.6816	123.202	2.1861	1.72987	3.21429
2.3	0.00998942	0.0996138	0.251738	1.17772	-4.60623	-2.30645	-1.37937	0.16358	-1286.68	10.6981	-0.905383	0.618046	0.0923051	0.999929	7.07115	58.7931	123.044	2.2666	1.50442	3.28571
2.35	0.0104732	0.10384	0.261409	1.20987	-4.55894	-2.2649	-1.34167	0.190513	-1281.33	10.6536	-0.875424	0.578635	0.0879783	0.999935	7.08501	58.9083	122.915	2.33654	1.27559	3.35714
2.4	0.0109675	0.108152	0.271249	1.24224	-4.51282	-2.22422	-1.30472	0.216916	-1276.15	10.6105	-0.847519	0.541631	0.0836425	0.999941	7.09925	59.0267	122.815	2.39415	1.08822	3.42857
2.45	0.0114724	0.11255	0.281257	1.27483	-4.46781	-2.18436	-1.26849	0.242813	-1271.13	10.5688	-0.821261	0.51012	0.0793	0.999947	7.1138	59.1477	122.741	2.44536	0.955819	3.5
2.5	0.0119878	0.117036	0.291433	1.30764	-4.42387	-2.14527	-1.23295	0.268224	-1266.27	10.5284	-0.796507	0.483416	0.0748893	0.999952	7.12866	59.2713	122.694	2.48974	0.807976	3.57143
2.55	0.0125138	0.121609	0.301776	1.34067	-4.38092	-2.10694	-1.19807	0.293169	-1261.55	10.4892	-0.77292	0.45736	0.0704571	0.999958	7.14375	59.3967	122.672	2.52616	0.683347	3.64286
2.6	0.0130503	0.126268	0.312287	1.37393	-4.33894	-2.06935	-1.16383	0.317675	-1256.98	10.4511	-0.750771	0.428056	0.0660444	0.999963	7.15905	59.5239	122.674	2.55807	0.571997	3.71429
2.65	0.0135974	0.131016	0.322964	1.4074	-4.29788	-2.03244	-1.13021	0.341744	-1252.52	10.4141	-0.730114	0.404535	0.0615642	0.999967	7.17451	59.6525	122.699	2.58336	0.457179	3.78571
2.7	0.0141551	0.135851	0.333808	1.44109	-4.25768	-1.9962	-1.09719	0.3654	-1248.19	10.3781	-0.710318	0.385855	0.0570942	0.999972	7.19012	59.7822	122.747	2.60379	0.379352	3.85714
2.75	0.0147234	0.140774	0.344818	1.475	-4.21832	-1.9606	-1.06474	0.388658	-1243.98	10.3431	-0.691529	0.366937	0.0526072	0.999976	7.20583	59.9129	122.815	2.6213	0.317319	3.92857
2.8	0.0153023	0.145786	0.355994	1.50913	-4.17975	-1.92562	-1.03284	0.411533	-1239.88	10.309	-0.673624	0.348612	0.0480874	0.99998	7.22164	60.0443	122.905	2.63552	0.254684	4
2.85	0.0158918	0.150886	0.367336	1.54348	-4.14195	-1.89123	-1.00148	0.43404	-1235.88	10.2757	-0.656668	0.32993	0.0435699	0.999983	7.23753	60.1764	123.015	2.64677	0.175948	4.07143
2.9	0.0164919	0.156075	0.378844	1.57804	-4.10489	-1.85742	-0.970631	0.456184	-1231.98	10.2433	-0.640631	0.315122	0.039038	0.999987	7.25348	60.309	123.144	2.65312	0.118593	4.14286
2.95	0.0171028	0.161353	0.390518	1.61283	-4.06851	-1.82416	-0.940281	0.47799	-1228.17	10.2117	-0.625155	0.300357	0.0345122	0.99999	7.26944	60.4417	123.292	2.65862	0.102603	4.21429
3	0.0177242	0.16672	0.402358	1.64783	-4.03282	-1.79144	-0.910413	0.499459	-1224.46	10.1808	-0.610595	0.284878	0.029981	0.999992	7.28545	60.5749	123.458	2.66338	0.0540913	4.28571
3.05	0.0183564	0.172178	0.414364	1.68304	-3.99778	-1.75923	-0.88101	0.520602	-1220.83	10.1506	-0.596668	0.273294	0.0254255	0.999994	7.30147	60.7081	123.641	2.66403	-0.00726385	4.35714
3.1	0.0189993	0.177726	0.426536	1.71848	-3.96335	-1.72751	-0.852059	0.54144	-1217.28	10.1211	-0.583266	0.26038	0.0208697	0.999996	7.31749	60.8413	123.843	2.66265	-0.0362554	4.42857
3.15	0.019653	0.183364	0.438874	1.75413	-3.92953	-1.69628	-0.823543	0.561973	-1213.82	10.0923	-0.57063	0.248972	0.016325	0.999998	7.33349	60.9743	124.06	2.66041	-0.0533732	4.5
3.2	0.0203174	0.189093	0.451378	1.78999	-3.89628	-1.66552	-0.79545	0.58221	-1210.42	10.0641	-0.558368	0.240697	0.0117717	0.999999	7.34949	61.1073	124.294	2.65731	-0.0737607	4.57143
3.25	0.0209927	0.194914	0.464049	1.82608	-3.86358	-1.6352	-0.767765	0.602172	-1207.1	10.0364	-0.54656	0.228915	0.00721315	1	7.36545	61.2401	124.544	2.65303	-0.10162	4.64286
3.3	0.0216787	0.200826	0.476886	1.86238	-3.83143	-1.60532	-0.740478	0.621855	-1203.85	10.0094	-0.535477	0.218584	0.00265866	1	7.3814	61.3726	124.809	2.64715	-0.1283	4.71429
3.35	0.0223757	0.20683	0.489891	1.89889	-3.79978	-1.57586	-0.713572	0.64127	-1200.66	9.98289	-0.524701	0.212822	0.0018797	1	7.39729	61.5048	125.09	2.6402	-0.140017	4.78571
3.4	0.0230835	0.212927	0.503062	1.93563	-3.76864	-1.54681	-0.687042	0.660433	-1197.54	9.95692	-0.514195	0.201929	0.00643482	1	7.41315	61.6367	125.385	2.63315	-0.16135	4.85714
3.45	0.0238022	0.219116	0.5164	1.97258	-3.73798	-1.51815	-0.660874	0.679342	-1194.48	9.93147	-0.504509	0.192495	0.0109737	0.999999	7.42896	61.7681	125.694	2.62407	-0.182792	4.92857
3.5	0.024532	0.225399	0.529907	2.00974	-3.70778	-1.48988	-0.635054	0.698005	-1191.47	9.90647	-0.494945	0.189154	0.0155069	0.999998	7.44471	61.8991	126.018	2.61487	-0.183429	5
3.55	0.0252727	0.231775	0.543581	2.04713	-3.67803	-1.46199	-0.609577	0.716439	-1188.52	9.88197	-0.485593	0.181476	0.020032	0.999996	7.46041	62.0296	126.355	2.60572	-0.186229	5.07143
3.6	0.0260244	0.238245	0.557423	2.08473	-3.64872	-1.43446	-0.584431	0.734639	-1185.63	9.85791	-0.476798	0.173304	0.0245515	0.999994	7.47605	62.1596	126.706	2.59625	-0.198999	5.14286
3.65	0.0267872	0.24481	0.571435	2.12255	-3.61983	-1.40727	-0.559605	0.752618	-1182.79	9.83429	-0.468263	0.167319	0.0290631	0.999992	7.49164	62.2892	127.07	2.58582	-0.212208	5.21429
3.7	0.0275611	0.25147	0.585615	2.16059	-3.59135	-1.38043	-0.535093	0.770381	-1180	9.81109	-0.460066	0.160904	0.0335719	0.99999	7.50715	62.4182	127.447	2.57503	-0.216167	5.28571
3.75	0.0283461	0.258225	0.599965	2.19884	-3.56327	-1.35392	-0.510884	0.78793	-1177.25	9.78828	-0.452172	0.156603	0.0380646	0.999987	7.52261	62.5467	127.836	2.56421	-0.224072	5.35714
3.8	0.0291423	0.265076	0.614485	2.23731	-3.53556	-1.32774	-0.486971	0.805274	-1174.56	9.76587	-0.444405	0.150679	0.0425486	0.999983	7.53799	62.6746	128.238	2.55262	-0.23849	5.42857
3.85	0.0299497	0.272023	0.629175	2.27601	-3.50824	-1.30187	-0.463346	0.822424	-1171.91	9.74384	-0.437104	0.143428	0.0470201	0.99998	7.55331	62.802	128.652	2.54036	-0.244271	5.5
3.9	0.0307684	0.279067	0.644035	2.31491	-3.48127	-1.2763	-0.440002	0.839371	-1169.3	9.72216	-0.430063	0.14017	0.0514859	0.999975	7.56855	62.9287	129.078	2.52819	-0.242052	5.57143
3.95	0.0315984	0.286208	0.659067	2.35404	-3.45465	-1.25104	-0.41693	0.856133	-1166.74	9.70084	-0.423087	0.136826	0.0559342	0.999971	7.58371	63.0548	129.516	2.51615	-0.239051	5.64286
4	0.0324398	0.293447	0.674271	2.39339	-3.42837	-1.22606	-0.394123	0.872711	-1164.21	9.67985	-0.41638	0.131048	0.0603716	0.999966	7.59881	63.1803	129.965	2.50429	-0.239345	5.71429
4.05	0.0332925	0.300784	0.689647	2.43296	-3.40242	-1.20136	-0.371575	0.889109	-1161.73	9.6592	-0.409983	0.125899	0.0647982	0.999961	7.61383	63.3052	130.426	2.49222	-0.250484	5.78571
4.1	0.0341567	0.30822	0.705196	2.47274	-3.3768	-1.17694	-0.34928	0.905327	-1159.28	9.63885	-0.40379	0.123351	0.069213	0.999955	7.62878	63.4295	130.898	2.47924	-0.256851	5.85714
4.15	0.0350324	0.315755	0.720918	2.51275	-3.35148	-1.15279	-0.32723	0.921378	-1156.87	9.61882	-0.397648	0.120044	0.0736131	0.999949	7.64365	63.5531	131.381	2.46653	-0.249122	5.92857
4.2	0.0359196	0.323389	0.736814	2.55298	-3.32647	-1.1289	-0.30542	0.937261	-1154.5	9.59909	-0.391786	0.115271	0.0779924	0.999943	7.65845	63.6762	131.875	2.45433	-0.248426	6
4.25	0.0368184	0.331124	0.752885	2.59343	-3.30176	-1.10526	-0.283843	0.952981	-1152.16	9.57964	-0.386121	0.11159	0.0823645	0.999936	7.67317	63.7986	132.38	2.44169	-0.250774	6.07143
4.3	0.0377288	0.338959	0.76913	2.6341	-3.27733	-1.08188	-0.262495	0.968542	-1149.86	9.56048	-0.380627	0.108088	0.0867191	0.999929	7.68781	63.9203	132.895	2.42925	-0.246801	6.14286
4.35	0.0386509	0.346896	0.785552	2.67499	-3.25319	-1.05873	-0.241369	0.983946	-1147.58	9.54158	-0.375312	0.104988	0.0910625	0.999922	7.70239	64.0415	133.42	2.41701	-0.257201	6.21429
4.4	0.0395847	0.354935	0.802149	2.7161	-3.22931	-1.03582	-0.220461	0.999197	-1145.34	9.52295	-0.370128	0.102665	0.0953985	0.999914	7.71688	64.162	133.956	2.40353	-0.258401	6.28571
4.45	0.0405304	0.363075	0.818924	2.75744	-3.2057	-1.01315	-0.199764	1.0143	-1143.13	9.50457	-0.365045	0.100561	0.0996994	0.999906	7.7313	64.2819	134.502	2.39117	-0.241626	6.35714
4.5	0.0414878	0.371319	0.835876	2.799	-3.18236	-0.990694	-0.179275	1.02926	-1140.95	9.48644	-0.360072	0.0970594	0.104002	0.999897	7.74564	64.4011	135.058	2.37937	-0.248359	6.42857
4.55	0.0424571	0.379666	0.853006	2.84079	-3.15926	-0.968463	-0.158989	1.04408	-1138.8	9.46856	-0.355339	0.0925356	0.108286	0.999888	7.75991	64.5198	135.624	2.36634	-0.258026	6.5
4.6	0.0434384	0.388117	0.870315	2.8828	-3.13641	-0.946448	-0.1389	1.05876	-1136.68	9.45091	-0.350818	0.0904054	0.112553	0.999879	7.7741	64.6378	136.2	2.35356	-0.247331	6.57143
4.65	0.0444317	0.396673	0.887803	2.92503	-3.1138	-0.924643	-0.119005	1.0733	-1134.58	9.43348	-0.346299	0.0887069	0.116811	0.99987	7.78822	64.7551	136.785	2.3416	-0.242242	6.64286
4.7	0.045437	0.405334	0.905472	2.96749	-3.09143	-0.903044	-0.0992989	1.08772	-1132.51	9.41628	-0.341948	0.0864103	0.121051	0.99986	7.80227	64.8719	137.38	2.32934	-0.247906	6.71429
4.75	0.0464545	0.414101	0.923322	3.01017	-3.06928	-0.881645	-0.0797772	1.102	-1130.47	9.39928	-0.337658	0.0852571	0.125276	0.99985	7.81623	64.9881	137.985	2.31681	-0.244995	6.78571
4.8	0.0474841	0.422974	0.941353	3.05309	-3.04736	-0.860445	-0.0604371	1.11615	-1128.45	9.38251	-0.333422	0.0817423	0.129486	0.999839	7.83013	65.1036	138.599	2.30484	-0.237624	6.85714
4.85	0.0485259	0.431953	0.959567	3.09623	-3.02566	-0.839438	-0.0412731	1.13019	-1126.46	9.36594	-0.329483	0.078554	0.133671	0.999829	7.84396	65.2186	139.222	2.29305	-0.240648	6.92857
4.9	0.04958	0.441041	0.977964	3.13959	-3.00417	-0.818617	-0.0222824	1.14409	-1124.49	9.34956	-0.325566	0.0774113	0.137855	0.999817	7.85771	65.3329	139.854	2.28077	-0.247381	7
4.95	0.0506465	0.450236	0.996545	3.18319	-2.98289	-0.797983	-0.00346098	1.15788	-1122.54	9.33338	-0.321742	22.111	0.142011	0.999806	7.87139	65.4466	140.495	2.26831	109.408	7.07143
5	0.0517254	0.45954	1.01531	3.22701	-2.96181	-0.777529	0.015194	1.17156	-1120.62	9.31739	1.88553	-0.0649984	0.146157	0.999794	7.88499	65.5598		13.2215	0.458245	7.14286
